1                                    **Self-assembly of pericentriolar material in**  
2                                    **interphase cells lacking centrioles**

3

4                    Fangrui Chen<sup>1</sup>, Jingchao Wu<sup>1</sup>, Malina K. Iwanski<sup>1</sup>, Daphne Jurriens<sup>1</sup>, Arianna Sandron<sup>1</sup>,

5                    Milena Pasolli<sup>1</sup>, Gianmarco Puma<sup>1</sup>, Jannes Z. Kromhout<sup>1</sup>, Chao Yang<sup>1</sup>, Wilco Nijenhuis<sup>1,2</sup>,

6                                    Lukas C. Kapitein<sup>1,2</sup>, Florian Berger<sup>1</sup> and Anna Akhmanova<sup>1</sup>

7

8                    <sup>1</sup> Cell Biology, Neurobiology and Biophysics, Department of Biology, Faculty of Science, Utrecht  
9                    University, Utrecht, The Netherlands

10                    <sup>2</sup> Center for Living Technologies, Eindhoven-Wageningen-Utrecht Alliance, The Netherlands

11                    Correspondence: a.akhmanova@uu.nl

12 **Abstract**

13 The major microtubule-organizing center (MTOC) in animal cells, the centrosome, comprises a pair of  
14 centrioles surrounded by pericentriolar material (PCM), which nucleates and anchors microtubules.  
15 Centrosome assembly depends on PCM binding to centrioles, PCM self-association and dynein-  
16 mediated PCM transport, but the self-assembly properties of PCM in interphase cells are poorly  
17 understood. Here, we used experiments and modeling to study centriole-independent features of  
18 interphase PCM assembly. We showed that when centrioles are lost due to PLK4 depletion or  
19 inhibition, dynein-based PCM transport and PCM self-clustering are sufficient to form a single compact  
20 MTOC, which generates a dense radial microtubule array. Interphase PCM self-assembly depends on  
21  $\gamma$ -tubulin, pericentrin, CDK5RAP2 and ninein, but not NEDD1, CEP152 or CEP192. Formation of a  
22 compact acentriolar MTOC is inhibited by AKAP450-dependent PCM recruitment to the Golgi or by  
23 randomly organized CAMSAP2-stabilized microtubules, which keep PCM mobile and prevent its  
24 coalescence. Linking of CAMSAP2 to a minus-end-directed motor leads to the formation of an MTOC,  
25 but MTOC compaction requires cooperation with pericentrin-containing self-clustering PCM. Our data  
26 reveal that interphase PCM contains a set of components that can self-assemble into a compact  
27 structure and organize microtubules, but PCM self-organization is sensitive to motor- and  
28 microtubule-based rearrangement.

## 29 **Introduction**

30 The centrosome is the major microtubule organizing center (MTOC) in animal cells. It consists of two  
31 centrioles surrounded by pericentriolar material (PCM) (reviewed in (Conduit et al., 2015; Paz and  
32 Luders, 2017)). Major PCM components are microtubule-nucleating and anchoring proteins, which  
33 can associate with centrioles and with each other. For a long time it was thought that the PCM is  
34 amorphous, but super-resolution microscopy studies have shown that it has a distinct organization,  
35 with some proteins likely attached to the centriole wall and others organized around them (Fu and  
36 Glover, 2012; Lawo et al., 2012; Mennella et al., 2014; Mennella et al., 2012). This distinct organization  
37 is more obvious in interphase than in mitosis, when the microtubule-organizing capacity of the  
38 centrosome increases due to enhanced PCM recruitment. Many PCM components are known to  
39 oligomerize and interact with each other, and recent work suggested that the phase separation of  
40 interacting PCM components might contribute to centrosome assembly during mitosis (Raff, 2019;  
41 Woodruff et al., 2017). This idea is underscored by data showing that various cell-type-specific  
42 assemblies of PCM components can form clusters that are able to nucleate and organize microtubules  
43 and serve as MTOCs in the absence of centrioles, particularly during the formation of mitotic spindle  
44 poles (Balestra et al., 2021; Chinen et al., 2021; Gartenmann et al., 2020; Meitinger et al., 2020;  
45 Watanabe et al., 2020; Yeow et al., 2020). Furthermore, an important centrosome component,  
46 cytoplasmic dynein, is a motor that can bind to different PCM proteins and transport them to the  
47 centrosome-anchored microtubule ends, where these PCM proteins can nucleate and anchor  
48 additional microtubules, thus generating a positive feedback loop in centrosome assembly (Balczon et  
49 al., 1999; Burakov et al., 2008; Purohit et al., 1999; Redwine et al., 2017). Dynein and its mitotic binding  
50 partner NuMA also strongly participate in the formation of mitotic and meiotic spindle poles (Chinen  
51 et al., 2020; Khodjakov et al., 2000; Kolano et al., 2012). The relative importance of different molecular  
52 pathways of PCM assembly varies between cell systems and phases of the cell cycle and has not been  
53 explored systematically in interphase cells.

54 Here, we set out to investigate the centriole-independent self-assembly properties of interphase PCM.  
55 These properties, such as the ability of PCM to cluster or form molecular condensates, nucleate and  
56 anchor microtubules and move with motor proteins, are relevant because in most differentiated cell  
57 types, centrosome function is suppressed, and PCM forms acentrosomal MTOCs that are still poorly  
58 understood (Muroyama and Lechler, 2017; Sallee and Feldman, 2021). To study centriole-independent  
59 PCM function and dynamics, we removed centrioles using the PLK4 kinase inhibitor centrinone B  
60 which blocks centriole duplication (Wong et al., 2015). Importantly, in most commonly studied  
61 cultured cell lines, such as fibroblasts, epithelial, endothelial or cancer cells, microtubule networks are  
62 dense, and the centrosome is not the only MTOC. In such cells, non-centrosomal microtubule minus

63 ends are often stabilized by the members of CAMSAP family (Jiang et al., 2014; Meng et al., 2008;  
64 Tanaka et al., 2012), and the Golgi apparatus serves as a second MTOC which nucleates and anchors  
65 a very significant proportion of microtubules (Efimov et al., 2007; Rios, 2014; Wu et al., 2016; Zhu and  
66 Kaverina, 2013). If centrosomes are lost because centriole duplication is blocked by inhibiting PLK4 or  
67 depleting another essential centriole component, Golgi-dependent microtubule organization  
68 becomes predominant (Gavilan et al., 2018; Martin et al., 2018; Wu et al., 2016). The ability of the  
69 Golgi complex to serve as an MTOC critically depends on the Golgi adaptor AKAP450, which recruits  
70 several PCM components that nucleate microtubules including the  $\gamma$ -tubulin ring complex ( $\gamma$ -TuRC),  
71 CDK5RAP2 and pericentrin (Gavilan et al., 2018; Rivero et al., 2009; Wu et al., 2016). Moreover,  
72 AKAP450 also tethers microtubule minus ends stabilized by CAMSAP2 to the Golgi membranes (Wu et  
73 al., 2016). In the absence of AKAP450, the Golgi ribbon is maintained, but neither PCM components  
74 nor CAMSAP-stabilized microtubule minus ends can be attached to the Golgi membranes and they are  
75 instead dispersed in cytoplasm, leading to a randomly organized microtubule network (Gavilan et al.,  
76 2018; Rivero et al., 2009; Wu et al., 2016). These data seem to suggest that centrioles and/or Golgi  
77 membranes are essential to assemble PCM into an MTOC in interphase. However, this notion appears  
78 to be inaccurate: in our previous study in RPE1 cells, we observed that a single compact acentriolar  
79 MTOC (caMTOC) can still form after centriole loss in AKAP450 knockout cells, if the stabilization of  
80 free minus ends in these cells is disabled by knocking out CAMSAP2 (Wu et al., 2016).

81 We used this observation as a starting point to investigate which properties of PCM allow it to self-  
82 assemble in interphase mammalian cells and how the presence of non-centrosomal microtubules  
83 affects this process. AKAP450 knockout cells provided a system to study PCM assembly in the absence  
84 of competition with the Golgi-associated MTOC. caMTOC formation in AKAP450 knockout cells  
85 required microtubules and depended on dynein, which brought together small PCM clusters with  
86 attached minus ends. Experiments and modeling showed CAMSAP2-mediated minus-end stabilization  
87 strongly perturbed PCM coalescence, because in the absence of AKAP450, randomly oriented  
88 CAMSAP2-stabilized microtubules supported PCM motility and prevented PCM clustering. In the  
89 absence of CAMSAP2, caMTOCs did form, but were often cylindrical rather than spherical in shape  
90 and contained a subset of the major centrosome components.  $\gamma$ -tubulin, pericentrin, CDK5RAP2 and  
91 ninein were necessary for the formation of caMTOCs, whereas some other major PCM proteins,  
92 namely CEP192, CEP152 and NEDD1, were neither enriched in these structures nor required for their  
93 formation, indicating that not all PCM components associate with each other in the absence of  
94 centrioles. A single caMTOC containing PCM components could also form in the presence of CAMSAP2  
95 when this protein was directly linked to a microtubule minus-end-directed motor. Importantly, in the  
96 absence of pericentrin, minus-end-directed transport of CAMSAP2-stabilized minus ends organized

97 these ends into a ring, indicating that self-associating PCM is required for the formation of a caMTOC.  
98 This conclusion was supported by modeling. Taken together, our data show that a subset of interphase  
99 PCM components can self-assemble and efficiently nucleate and tether microtubules, but PCM  
100 clustering is sensitive to microtubule- and motor-dependent rearrangements. These properties of  
101 interphase PCM may also be involved in the transition from a centrosomal to a non-centrosomal  
102 microtubule network, as typically occurs during cell differentiation.

103 **Results**

104 ***Assembly of microtubule-dependent caMTOCs in AKAP450/CAMSAP2 KO cells lacking PLK4 activity***

105 To study centriole-independent PCM organization and dynamics in interphase cells, we induced  
106 centriole loss in RPE1 cells by treating them for 11 days with the PLK4 inhibitor centrinone B (Wong et  
107 al., 2015) (Figure 1A,B). In wild type (WT) cells, PCM (detected with antibodies against pericentrin)  
108 relocalized to the Golgi apparatus, and the microtubule array reorganized around the Golgi  
109 membranes, as described previously (Gavilan et al., 2018; Wu et al., 2016) (Figure 1C,D). In AKAP450  
110 knockout cells, centriole loss led to the appearance of strongly dispersed PCM clusters, which could  
111 no longer bind to the Golgi, and a highly disorganized microtubule system, consistent with published  
112 work (Gavilan et al., 2018; Wu et al., 2016) (Figure 1D,E). In contrast, in AKAP450/CAMSAP2 double  
113 knockout cells, a single caMTOC with microtubules focused around it was observed (Figure 1D-F).  
114 Formation of a single caMTOC was also observed in AKAP450 knockout cells transiently depleted of  
115 CAMSAP2 by siRNA transfection (Figure 1 – figure supplement 1A,B). As an alternative approach to  
116 block the ability of the Golgi apparatus to recruit PCM, we treated the cells with Brefeldin A, which  
117 disrupts the Golgi (Klausner et al., 1992). As expected, Brefeldin A by itself had no effect on  
118 centrosome integrity but led to the dispersal of the Golgi marker GM130 (Figure 1 – figure supplement  
119 1C-E). In centrinone-treated wild type cells, PCM was dispersed after Golgi disruption, and the same  
120 was true for the majority of CAMSAP2 knockout cells (Figure 1 – figure supplement 1C-F). However, in  
121 12 % of CAMSAP2 knockout cells treated with both centrinone B and Brefeldin A, we observed PCM  
122 compaction (Figure 1 – figure supplement 1D-F), similar to that seen in AKAP450/CAMSAP2 double  
123 knockout cells. The efficiency of caMTOC formation was low likely because dispersed AKAP450 could  
124 still recruit PCM to some extent or because the duration of the Brefeldin A treatment (2 hrs) was too  
125 short to allow for PCM compaction in most cells (longer Brefeldin A treatments were not performed  
126 due to potential cell toxicity). The acentriolar PCM can thus form a compact structure if both the Golgi  
127 MTOC and CAMSAP2-mediated minus-end stabilization are disabled.

128 Unlike centrosomes, which always have a spherical shape, caMTOCs in AKAP450/CAMSAP2 knockout  
129 cells were cylindrical in ~35% of the cells, whereas in the remaining cells that lacked centrioles based  
130 on staining for centrin, MTOCs had a round shape (~38% of the cells); the rest of the centrin-negative  
131 cells either had dispersed PCM clusters (~7%) or no detectable PCM clusters (~11%) (Figure 1 – figure  
132 supplement 2A, B). In contrast, ~72% of acentriolar AKAP450 knockout cells had dispersed PCM, while  
133 caMTOCs were very rare (Figure 1E, Figure 1 – figure supplement 2A, B). Analysis by Stimulated  
134 Emission Depletion (STED) microscopy revealed that cylindrical caMTOCs in AKAP450/CAMSAP2  
135 knockout cells consisted of small clusters of PCM components, including pericentrin, CDK5RAP2,  $\gamma$ -

136 tubulin, ninein and dynein heavy chain (Figure 1F). caMTOCs with a clearly elongated shape had an  
137 average length of  $\sim 11 \mu\text{m}$  and an average width of  $\sim 1.5 \mu\text{m}$  (Figure 1G).

138 To study PCM dynamics in caMTOCs, we generated cell lines stably expressing the PCM component  
139 CDK5RAP2 tagged with GFP. In control, untreated cells, GFP-CDK5RAP2 was localized to the  
140 centrosome and the Golgi apparatus as expected (Figure 1 – figure supplement 3A). In centrinone-  
141 treated AKAP450/CAMSAP2 knockout cells, it was strongly enriched within caMTOCs and sometimes  
142 also present in small motile clusters around a caMTOC (Figure 1H, Figure 1 – figure supplement 3B).  
143 Fluorescence recovery after photobleaching (FRAP) assays showed that when the whole caMTOC was  
144 bleached, the recovery was very slow and incomplete (Figure 1H, I). If only a part of a caMTOC was  
145 photobleached, the dynamics of recovery showed cell-to-cell variability. Highly condensed caMTOCs  
146 displayed a slow redistribution of GFP-CDK5RAP2 signal, suggesting that their components are largely  
147 immobile and do not rearrange. In more loosely organized caMTOCs, some rearrangement of small  
148 PCM clusters was observed (Figure 1H,I); however, the recovery was still far from complete. These  
149 data indicate that caMTOCs display variable degrees of compaction and are composed of PCM clusters  
150 that display limited exchange of GFP-CDK5RAP2 with the cytoplasmic pool, possibly because most of  
151 the GFP-CDK5RAP2 is accumulated within the caMTOC.

152 Next, we investigated whether centriole loss induced by means other than pharmacological PLK4  
153 inhibition could also cause the formation of a single caMTOC in AKAP450/CAMSAP2 knockout cells. To  
154 achieve efficient protein depletion in RPE1 cells, they were transfected with siRNAs twice (on day 0  
155 and day 2), treated with thymidine starting from day 4 to block cell cycle progression and fixed and  
156 stained on day 5 or day 7 (Figure 1 – figure supplement 2C). Depletion of PLK4 using siRNAs caused  
157 the appearance of round or cylindrical caMTOCs, similar to those observed after PLK4 inhibition with  
158 centrinone B, indicating that catalytically inactive PLK4 had no scaffolding role within these structures  
159 (Figure 1 – figure supplement 2C-F). The percentage of cells with caMTOCs increased over time (Figure  
160 1 – figure supplement 2D), possibly due to the gradual depletion of PLK4. In contrast, depletion of  
161 CPAP, an essential centriole biogenesis factor (Kohlmaier et al., 2009; Schmidt et al., 2009; Tang et al.,  
162 2009), which also led to centriole loss, was much less efficient in inducing caMTOCs, and cylindrical  
163 caMTOCs were never observed (Figure 1 – figure supplement 2C-E). After CPAP depletion, cells in  
164 which pericentrin formed dispersed clusters or no visible clusters predominated ( $\sim 67\%$ , Figure 1 –  
165 figure supplement 2D, E). Treatment of CPAP-depleted AKAP450/CAMSAP2 knockout cells with  
166 centrinone B for 1 day promoted the assembly of round or cylindrical caMTOCs, and the proportion  
167 of such cells increased to  $\sim 55\%$  after 3 days of centrinone B treatment (Figure 1 – figure supplement  
168 2C-G). We also tested whether the inhibition of PLK1, a kinase that is known to be a major regulator  
169 of PCM self-assembly in mitosis (Haren et al., 2009; Joukov et al., 2014; Lee and Rhee, 2011), has an

170 effect on the formation of caMTOCs by treating cells with BI2536 (a highly selective and potent  
171 inhibitor of PLK1), but found this not to be the case (Figure 1 – figure supplement 2C, D). We conclude  
172 that PCM can assemble into a single stable MTOC in a centriole-independent manner if PLK4 is either  
173 inactivated or depleted and the two major pathways of microtubule nucleation and minus-end  
174 stabilization dependent on the Golgi membranes and CAMSAP2 are disabled.

175

### 176 ***Composition of caMTOCs and their effect on microtubule organization***

177 PCM is composed of numerous proteins that can bind to each other and interact with microtubules,  
178 and we next set out to investigate which PCM components can self-assemble in the absence of  
179 centrioles. We first stained centrinone-treated AKAP450/CAMSAP2 knockout cells with antibodies  
180 against different centrosome and centriole markers and microtubule-associated proteins (MAPs). As  
181 indicated above, the abundant PCM components pericentrin, CDK5RAP2, ninein and  $\gamma$ -tubulin  
182 colocalized within caMTOCs (Figure 1F). In contrast, three other major PCM proteins, CEP152, CEP192  
183 and NEDD1, could not be detected in these structures although they were present in centrosomes of  
184 AKAP450/CAMSAP2 knockout RPE1 cells that were not treated with centrinone B (Figure 2A-C) and  
185 were also expressed in centrinone-treated cells (Figure 2 – figure supplement 1A). We then  
186 individually depleted all these proteins in centrinone-treated AKAP450/CAMSAP2 knockout cells using  
187 siRNAs. After the depletion of pericentrin, no clusters of other PCM components could be detected  
188 (Figure 2D,J,K, Figure 2 – figure supplement 1B). To confirm this result, we also attempted to knock  
189 out pericentrin in AKAP450/CAMSAP2 knockout cells, but such cells were not viable, likely because  
190 centrosome defects in these cells caused prolonged mitosis and p53-dependent G1 arrest (Fong et al.,  
191 2016; Lambrus et al., 2016; Meitinger et al., 2016). However, we were able to knock out pericentrin in  
192 cells lacking AKAP450, CAMSAP2 and p53 (Figure 2 – figure supplement 2), confirming that the loss of  
193 p53 makes the cells more tolerant to centrosome absence and allows them to divide even in the  
194 presence of centrinone B (Figure 2 – figure supplement 3, Video 1). Similar to pericentrin-depleted  
195 cells, these quadruple knockout cells were unable to form a single caMTOC when treated with  
196 centrinone B (Figure 2E, J). In these acentriolar quadruple knockout cells, CDK5RAP2,  $\gamma$ -tubulin and  
197 cytoplasmic dynein displayed no clustering, while ninein and PCM1, a centriolar satellite protein that  
198 localizes closely around the centrosome in normal cells (Prosser and Pelletier, 2020), formed small  
199 clusters distributed throughout the cytoplasm (Figure 2 – figure supplement 4A). Loss of pericentrin  
200 had no effect on the expression of CDK5RAP2,  $\gamma$ -tubulin and ninein (Figure 2 – figure supplement 4B),  
201 indicating that clustering by pericentrin affects the organization but not the stability of these PCM  
202 components.



203 The depletion of CDK5RAP2,  $\gamma$ -tubulin or ninein in centrinone-treated AKAP450/CAMSAP2 knockout  
204 cells did not prevent the formation of small pericentrin clusters, but these failed to coalesce into a  
205 single caMTOC (Figure 2F-H, J, Figure 2 – figure supplement 1B). In contrast, the depletion of CEP152,  
206 CEP192 or NEDD1 had no effect on the formation of caMTOCs (Figure 2A-C, J, Figure 2 – figure  
207 supplement 1B), in agreement with the fact these proteins could not be detected within these  
208 structures. caMTOCs contained several centriole biogenesis factors, including CPAP, CP110 and  
209 CEP120, but lacked centrin and CEP135; however, the depletion of different centriolar proteins did  
210 not affect caMTOC formation (Figure 2K, Figure 2 – figure supplement 1C). Within caMTOCs, we also  
211 detected a component of the HAUS complex (HAUS2), the centrosomal protein CEP170, dynein,  
212 dynactin, CLASP1/2, CLIP-115, CLIP-170, chTOG, KIF2A and KIF1C (Figure 2K, Figure 2 – figure  
213 supplement 1C). We tested the importance of some of these proteins for caMTOC formation by siRNA-  
214 mediated depletion (see Figure 2K for an overview), but among the tested proteins, only cytoplasmic  
215 dynein appeared essential for this process. In dynein-depleted cells, no clusters of pericentrin or other  
216 PCM components could be detected after centrinone B treatment (Figure 2I-K). It is important to note,  
217 however, that because we used siRNAs to reduce protein expression, we cannot exclude that the  
218 residual levels of some of the investigated proteins were sufficient to support caMTOC formation.  
219 Because we detected several microtubule plus-end tracking proteins (+TIPs) in the caMTOCs, such as  
220 CLIP-170, CLASP1/2 and the large subunit of dynactin, p150Glued, we also tested for the presence of  
221 the core components of the +TIP machinery, EB1 and EB3, but found that they were not enriched  
222 within the caMTOCs (Figure 2K, Figure 2 – supplement 5A). Using the previously described cells that  
223 lack EB3, CAMSAP2 and the C-terminal partner-binding half of EB1 (EB1/EB3/CAMSAP2mut cells; Yang  
224 et al., 2017), we generated a knockout cell line that also lacks AKAP450 and found that caMTOCs could  
225 still form in these cells (Figure 2K, Figure 2 – figure supplement 5B,C). We conclude that a subset of  
226 PCM components binds to each other in the absence of centrioles, and in AKAP450/CAMSAP2  
227 knockout cells, these proteins form caMTOCs that recruit a number of additional PCM proteins and  
228 MAPs normally present in interphase centrosomes.

229 Despite containing only a subset of centrosomal proteins, caMTOCs strongly affected the organization  
230 and density of the microtubule network in acentriolar cells: microtubules were focused around  
231 caMTOCs if present and disorganized in cells lacking caMTOCs. The strongest loss of microtubule  
232 density was observed in cells lacking pericentrin, dynein or  $\gamma$ -tubulin, while milder phenotypes were  
233 observed in cells lacking CDK5RAP2 or ninein (Figure 3A,B,E). To further characterize microtubule  
234 organization after the loss of these proteins, we analyzed the proportion of the radial and non-radial  
235 microtubules. Whereas control cells (AKAP450/CAMSAP2 knockout cells treated with centrinone B  
236 and control siRNA) formed radial microtubule networks with ~12% non-radial microtubules,

237 acentriolar cells lacking pericentrin or cytoplasmic dynein had ~46% non-radial microtubules, and the  
238 depletion of CDK5RAP2, ninein and  $\gamma$ -tubulin led to an intermediate phenotype with 25-30% non-  
239 radial microtubules (Figure 3C,D,E). An acentriolar PCM assembly containing pericentrin, CDK5RAP2,  
240 ninein,  $\gamma$ -tubulin and dynein is thus sufficient to form a radial microtubule array, similar to a  
241 centrosome, and PCM clustering promotes dense microtubule organization.

242

### 243 ***Dynamics of caMTOC disassembly***

244 To test whether the formation and maintenance of caMTOCs depends on microtubules, we  
245 depolymerized them by treating cells with nocodazole at 37°C and found that caMTOCs fragmented  
246 into small clusters upon nocodazole treatment and reassembled into a single structure after  
247 nocodazole washout (Figure 4A-C). Because we found that caMTOC formation is dynein-dependent,  
248 we also included the dynein inhibitor dynapyrazole A in these experiments (Steinman et al., 2017). We  
249 confirmed that treatment with dynapyrazole A for 3 hrs had no effect on dynein expression (Figure  
250 4D) and found that the addition of this drug before nocodazole treatment prevented the disassembly  
251 of caMTOCs, whereas the treatment of cells with dynapyrazole A during nocodazole washout strongly  
252 inhibited caMTOC re-assembly (Figure 4A-C). These data indicate that both microtubule-dependent  
253 dispersal and coalescence of PCM clusters into caMTOCs are driven by dynein activity.

254 We next studied PCM dynamics using stably expressed GFP-CDK5RAP2 as a marker in live cells where  
255 microtubules were labeled with SiR-tubulin. GFP-CDK5RAP2 was mostly immobile within caMTOCs  
256 before nocodazole treatment (Figure 1 – figure supplement 3B, Video 2). After a few minutes of  
257 nocodazole treatment, when the microtubule density was significantly reduced, small PCM clusters  
258 started to move out of the caMTOC and undergo rapid directional motility with speeds of up to 2  
259  $\mu\text{m}/\text{sec}$ , which is within the range characteristic for cytoplasmic dynein (Schlager et al., 2014) (Figure  
260 4E,F, Figure 4 – figure supplement 1A, Video 2). Once microtubules were completely disassembled,  
261 the movement of GFP-CDK5RAP2-positive clusters stopped, indicating that it is microtubule-  
262 dependent but occurs only when the microtubule network is partially depolymerized. Since cluster  
263 dispersal towards the cell periphery could be blocked by a dynein inhibitor, and since cytoplasmic  
264 dynein is a minus-end-directed motor, these data indicate that during microtubule disassembly by  
265 nocodazole at 37°C, there is a transient stage when PCM clusters interact with only a few  
266 microtubules, some of which have their minus-ends facing outwards, and these microtubules serve as  
267 tracks for PCM transport. To support this idea, we used motor-PAINT, a technique that employs  
268 nanometric tracking of purified kinesin motors on the extracted cytoskeleton of fixed cells to super-  
269 resolve microtubules and determine their orientation (Tas et al., 2017). Using this approach, we

270 determined microtubule orientations in centrinone-treated AKAP450/CAMSAP2 knockout cells and in  
271 cells that were also treated with nocodazole for 15 min to induce partial microtubule disassembly  
272 (Figure 4G, Figure 4 – figure supplement 1B). We found that the cells contained a significant number  
273 of minus-end-out microtubules, and their proportion increased during early stages of nocodazole  
274 treatment, possibly because minus-end-out microtubules are more stable (Figure 4G, e.g., minus-end-  
275 out microtubules constituted ~23% of the total microtubule length determined from kinesin-1  
276 trajectories in the untreated cell and ~46% in the nocodazole-treated cell). These microtubules could  
277 serve as tracks for outward movement of PCM, causing the disassembly of caMTOC when the overall  
278 microtubule density around the caMTOC was strongly reduced (Figure 4H). These data suggest that  
279 the dense network of PCM-anchored microtubule minus-ends around a caMTOC allows for its  
280 compaction via dynein-mediated forces, but that dynein can pull the caMTOC apart when  
281 microtubules are disorganized.

282 To further confirm that caMTOC disassembly is an active microtubule-dependent process, we also  
283 depolymerized microtubules by a combination of cold (4°C) and nocodazole treatment. When all  
284 microtubules were depolymerized, caMTOCs did not fall apart, even when the cells were subsequently  
285 warmed to 37°C in the presence of nocodazole, so that microtubules could not re-grow (Figure 4I).  
286 However, we noticed that in these conditions, the continuity and cylindrical organization of the PCM  
287 cluster were often perturbed. This raised the possibility that the elongated arrangement of PCM  
288 components within caMTOCs is microtubule-driven. Indeed, when cells were subjected to cold (4°C)  
289 treatment in the absence of nocodazole, most of microtubules depolymerized, but some short cold-  
290 stable microtubules remained associated with the caMTOC (Figure 4 – figure supplement 1C). These  
291 data indicate that PCM self-assembly in the absence of centrioles is microtubule-dependent, and  
292 microtubules are involved in shaping the PCM cluster. Once assembled, the PCM cluster is quite stable,  
293 unless microtubule organization is altered and dynein-driven microtubule-based transport pulls it  
294 apart.

295

### 296 ***Dynamics of caMTOC assembly***

297 When nocodazole-mediated microtubule disassembly was carried out at 4°C, the caMTOC remained  
298 intact and after nocodazole washout it served as the major microtubule nucleation site, similar to the  
299 centrosome in untreated wild-type cells (Figure 5 – figure supplement 1A). However, when  
300 nocodazole-mediated disassembly of the caMTOC was carried out at 37°C, the cluster fell apart and  
301 reassembled upon nocodazole washout (Figure 4A, B), providing a way to study the dynamics of PCM  
302 self-assembly and the roles of different PCM components during this process. Small PCM clusters

303 positive for pericentrin, CDK5RAP2,  $\gamma$ -tubulin and the centriolar satellite protein PCM1 that co-  
304 localized with the plus-ends of microtubules (labeled with EB1) could be detected 30 s after  
305 nocodazole washout; these PCM clusters and nascent microtubules did not colocalize with the Golgi  
306 membranes (Figure 5A, Figure 5 – figure supplement 1B). Ninein was not detected within the clusters  
307 at this early stage of microtubule regrowth but could be found 2 min after nocodazole washout. In  
308 contrast, no clusters of CEP192 or NEDD1 were observed even 10 min after nocodazole washout  
309 (Figure 5A, Figure 5 – figure supplement 1B,C). The depletion of pericentrin, CDK5RAP2 and  $\gamma$ -tubulin  
310 strongly inhibited microtubule nucleation in these conditions, whereas the depletion of dynein heavy  
311 chain or ninein had a milder effect (Figure 5B,C). Live cell imaging with GFP-CDK5RAP2 and SiR-tubulin  
312 showed that CDK5RAP2 clusters with attached microtubules coalesced by undergoing microtubule-  
313 based movements (Figure 5D), and measurements in cells fixed at different time points after  
314 nocodazole washout showed that a partly radial microtubule system emerged already 2 min after  
315 nocodazole washout (Figure 5 – figure supplement 1D). Reassembly of a single caMTOC in the central  
316 part of the cell occurred within ~15 min after nocodazole washout, though it was less compact than  
317 in cells that were not treated with nocodazole (Figure 5D-G). Depletion of pericentrin,  $\gamma$ -tubulin and  
318 dynein heavy chain strongly inhibited the reformation of a radial microtubule network during  
319 nocodazole washout, whereas the effect of depleting CDK5RAP2 and ninein was less strong (Figure 5  
320 – figure supplement 1D-F). Live cell imaging of acentriolar AKAP450/CAMSAP2 knockout RPE1 cells  
321 stably expressing GFP-CDK5RAP2 showed that when pericentrin was depleted, CDK5RAP2 clusters  
322 were not detectable, and the microtubule network, both before nocodazole treatment and after  
323 nocodazole washout, was disorganized (Figure 5 – figure supplement 2, Video 3). Taken together, our  
324 data show that pericentrin and  $\gamma$ -tubulin form microtubule-nucleating and anchoring units, which are  
325 clustered by the self-association of pericentrin and assembled into larger structures by dynein-based  
326 transport. CDK5RAP2 contributes to microtubule nucleation efficiency, whereas ninein appears to act  
327 somewhat later and contributes to the formation of a compact PCM cluster and a radial microtubule  
328 network. Importantly, all these proteins can cluster in the absence of centrioles, and together they  
329 can efficiently nucleate and anchor microtubules.

330

### 331 ***The role of CAMSAP2-stabilized minus ends in defining microtubule network geometry***

332 The results of nocodazole treatment and washout suggested that PCM can self-assemble into a  
333 caMTOC which nucleates and anchors microtubules, but this structure is sensitive to microtubule  
334 organization. This observation prompted us to investigate in more detail how the microtubules that  
335 are not anchored at PCM clusters affect PCM organization in steady state conditions. An abundant

336 population of stable minus ends that do not attach to PCM is decorated by CAMSAP2. In centrinone-  
337 treated wild type cells, CAMSAP2-bound microtubule minus ends were anchored at the Golgi (Wu et  
338 al., 2016)(Figure 1D), whereas in centrinone-treated AKAP450 knockout cells they were distributed  
339 randomly (Figure 1D, 6A). Live imaging showed that CAMSAP2-decorated minus ends displayed only  
340 limited motility on the scale of hours and thus formed a relatively stationary, disorganized microtubule  
341 network (Video 4). Live imaging of GFP-CDK5RAP2 together with SiR-tubulin in these cells  
342 demonstrated that small PCM clusters were distributed throughout the cytoplasm (Figure 6B). These  
343 clusters moved along microtubules and encountered each other, but the direction of the movements  
344 was random and the clusters did not coalesce into a single structure (Figure 6B, Figure 6 – figure  
345 supplement 1A, Video 5). Treatment with nocodazole and subsequent nocodazole washout confirmed  
346 that the motility of GFP-CDK5RAP2 clusters in centrinone-treated AKAP450 knockout cells was  
347 microtubule-dependent, and that these clusters could nucleate microtubules and move together with  
348 microtubule minus ends, but did not converge into a single caMTOC (Figure 6 – figure supplement 1A-  
349 C, Video 5). Treatment with dynapyrazole A strongly inhibited the movements of small PCM clusters  
350 (Figure 6 – figure supplement 1D,E, Video 6), indicating that they are dynein-driven. After the  
351 depletion of pericentrin, GFP-CDK5RAP2 became completely diffuse, and it failed to form clusters  
352 during nocodazole treatment or washout (Figure 6 – figure supplement 2, Video 7), indicating that  
353 clustering of GFP-CDK5RAP2 in AKAP450 knockout cells is pericentrin-dependent. Based on these data,  
354 we conclude that in AKAP450 knockout cells, pericentrin still forms PCM clusters that can nucleate  
355 microtubules and can be moved by dynein along other microtubules, similar to what occurs in wild-  
356 type cells. However, in the absence of AKAP450, CAMSAP2-stabilized microtubules form a  
357 disorganized network, which imposes a random motility pattern on pericentrin-dependent PCM  
358 clusters and thus prevents their assembly into a single caMTOC, likely because PCM interactions are  
359 not sufficient to trigger their stable association (Figure 6C).

360 If the geometry of the CAMSAP2-stabilized microtubule network determines PCM distribution,  
361 focusing CAMSAP2-bound minus ends is expected to bring PCM together. To test this idea, we linked  
362 CAMSAP2-stabilized minus ends to a minus-end-directed motor. In order to avoid potential cell  
363 toxicity associated with manipulating cytoplasmic dynein, we used the motor-containing part of a  
364 moss kinesin-14, type VI kinesin-14b from the spreading earthmoss *Physcomitrella patens* (termed  
365 here ppKin14). The C-terminal motor-containing part of this protein can efficiently induce minus-end-  
366 directed motility of different cargoes in mammalian cells when it is tetramerized through a fusion with  
367 the leucine zipper domain of GCN4 (GCN4-ppKin14-VIb (861–1321)) and recruited to cargoes using  
368 inducible protein heterodimerization (Jonsson et al., 2015; Nijenhuis et al., 2020). We employed a  
369 chemical heterodimerization system that is based on inducible binding of two protein domains, FRB

370 and FKBP, upon the addition of a rapamycin analog (rapalog) (Pollock et al., 2000). To ensure that all  
371 CAMSAP2-decorated microtubule minus ends were linked to kinesin-14, we rescued centrinone-  
372 treated AKAP450/CAMSAP2 knockout cells by expressing CAMSAP2 fused to a tandemly repeated  
373 FKBP domain (2FKBP-mCherry-CAMSAP2) (Figure 6D-F). This construct was co-expressed with the FRB-  
374 GCN4-tagBFP-ppKin14 fusion, which by itself localized quite diffusely, with only a weak enrichment  
375 along microtubules, as described previously (Nijenhuis et al., 2020) (Figure 6D,F). In the absence of  
376 rapalog, CAMSAP2-decorated microtubule minus ends were distributed randomly, similar to  
377 endogenous CAMSAP2 in AKAP450 knockout cells (Figure 6F). However, upon rapalog addition,  
378 ppKin14 was rapidly recruited to CAMSAP2-decorated microtubule ends, and after 2 hrs, more than  
379 90% of cells acquired a radial microtubule organization (Figure 6E-G). In rapalog-treated cells,  
380 CAMSAP2-bound microtubule minus ends formed either a tight cluster or a “whirlpool-like” ring in the  
381 cell center (Figure 6D-G, Figure 6 – figure supplement 1F). The whirlpool-like arrangement likely comes  
382 about when CAMSAP2-stretches are a bit longer and continue to slide against each other, forming a  
383 nematic circular bundle. The major caMTOC components, pericentrin, CDK5RAP2,  $\gamma$ -tubulin and ninein  
384 were also concentrated within the CAMSAP2 cluster (Figure 6F, Figure 6 – figure supplement 1F).  
385 These data indicate that the positioning of stabilized minus-ends is an important determinant of the  
386 overall microtubule organization and PCM localization in interphase cells.

387

### 388 ***The role of PCM in CAMSAP2-driven microtubule organization***

389 Presence of PCM in the caMTOC induced by minus-end-directed transport of CAMSAP2 might be a  
390 passive consequence of microtubule reorganization, but might also play an active role in forming this  
391 caMTOC. To distinguish between these possibilities, we attached CAMSAP2 to ppKin14 in centrinone  
392 -treated cells where both AKAP450 and pericentrin were knocked out  
393 (AKAP450/CAMSAP2/p53/pericentrin knockout). In the absence of rapalog, CAMSAP2-stabilized  
394 minus ends and the whole microtubule network were disorganized, as expected, and the same was  
395 true when the two constructs were expressed separately, with or without rapalog (Figure 7A,D, Figure  
396 7- figure supplement 1). After rapalog addition, microtubules in cells expressing both constructs  
397 acquired a radial organization, but their minus ends usually did not converge in a single spot but rather  
398 accumulated in a ~30-70  $\mu\text{m}$ -large ring-like structure (Figure 7A,D, Figure 7- figure supplement 2,  
399 Video 8). Staining for PCM markers showed that CDK5RAP2 and  $\gamma$ -tubulin were enriched in the vicinity  
400 of CAMSAP2-positive microtubule minus ends, whereas ninein appeared rather diffuse (Figure 7A). To  
401 determine the nature of the structure “corralled” by the ring of CAMSAP2-decorated minus ends in  
402 rapalog-treated cells, we stained for different membrane organelles and found that whereas there

403 was no strong correlation with the nucleus, Golgi membranes or lysosomes, the majority of  
404 mitochondria were found within the CAMSAP2 ring, and the endoplasmic reticulum (ER) displayed  
405 increased density overlapping with the CAMSAP2 ring (Figure 7B, Figure 7 - figure supplement 2B). It  
406 therefore appeared that in the absence of pericentrin, CAMSAP2-decorated minus ends were brought  
407 together by ppKin14, but their convergence was inefficient and possibly impeded by membrane  
408 organelles enriched in the central, thicker part of the cell before rapalog addition (see the upper panel  
409 of Figure 7 - figure supplement 2B). Transient transfection of centrinone-treated  
410 AKAP450/CAMSAP2/p53/pericentrin knockout cells with GFP-pericentrin rescued the formation of a  
411 tight CAMSAP2 cluster upon rapalog treatment (Figure 7C). Our data show that pericentrin-containing  
412 PCM contributes to the formation of a caMTOC driven by minus-end-directed transport of CAMSAP2-  
413 stabilized minus-ends.

414 To support this notion further, we also generated cells that were knockout for AKAP450, CAMSAP2,  
415 CDK5RAP2, myomegalin (MMG, homologue of CDK5RAP2), p53 and pericentrin. To achieve this, we  
416 used the previously described RPE1 cell line knockout for AKAP450, CAMSAP2, CDK5RAP2 and MMG  
417 (Wu et al., 2016), in which we sequentially knocked out p53 and pericentrin (Figure 7 – figure  
418 supplement 3A-G). While it was not possible to induce centriole loss by centrinone B treatment in  
419 AKAP450/CAMSAP2/CDK5RAP2/MMG knockout cells because the proliferation of these cells was  
420 arrested in the absence of centrioles (Wu et al., 2016), centriole removal was successful in  
421 AKAP450/CAMSAP2/CDK5RAP2/MMG/p53/pericentrin knockout cells due to the absence of p53 and  
422 led to microtubule disorganization (Figure 7 – figure supplement 3H). Interestingly, when these cells  
423 were co-transfected with FKBP-linked CAMSAP2 and FRB-linked ppKin14 and treated with rapalog  
424 (Figure 6D), we observed that CAMSAP2 clustering was even less efficient than in  
425 AKAP450/CAMSAP2/p53/pericentrin knockout cells (Figure 7D,E). 49% of  
426 AKAP450/CAMSAP2/CDK5RAP2/MMG/p53/pericentrin knockout cells had small bundles of CAMSAP2  
427 stretches dispersed throughout the cytoplasm, and only 37% of these cells formed a ring of CAMSAP2-  
428 decorated minus ends, whereas 80% of AKAP450/CAMSAP2/p53/pericentrin knockout cells formed  
429 such a ring. We examined the ER and mitochondria in these cells and found that in cells that did form  
430 a CAMSAP2 ring, the ER displayed an overlapping ring-like density, although the mitochondria inside  
431 the CAMSAP2 ring were more scattered compared to those of AKAP450/CAMSAP2/p53/pericentrin  
432 knockout cells (Figure 7 – figure supplement 2B). In cells with dispersed CAMSAP2-positive bundles,  
433 no increased ER density or central accumulation of mitochondria were observed (Figure 7 – figure  
434 supplement 2B). These data further support the notion that minus-end-directed transport of stable  
435 minus ends alone is insufficient to generate a caMTOC, and that synergy with PCM is required.

436

### 437 ***Recapitulation of PCM self-organization by computer simulations***

438 To rationalize the appearance of the different microtubule arrangements and to find a minimal set of  
439 interactions between filaments and motors that would lead to self-organization into structures that  
440 we observed experimentally, we set up agent-based computer simulations with Cytosim (Nedelec and  
441 Foethke, 2007). First, we sought to recapitulate the formation of a single PCM cluster. The numerical  
442 values for the parameters of our simulations have been taken from literature or reasonably chosen  
443 otherwise (Supplemental Table S1). For simplicity, we considered a two-dimensional circular cell with  
444 a radius of 10  $\mu\text{m}$ . We described a mobile PCM complex as a bead with a radius of 50 nm from which  
445 one microtubule plus end could grow. Microtubule growth and shrinkage were simulated with the  
446 classical microtubule model from Cytosim. When the microtubule reached a maximal length of 7.5  
447  $\mu\text{m}$ , its growth was stopped. In this way, we limited the microtubule length to avoid long microtubules  
448 that push their minus end to the periphery of the cell. Additionally, one dynein molecule was attached  
449 to a PCM complex with its cargo-binding domain. With this configuration, dynein molecules could  
450 transport PCM complexes along microtubules growing from other PCM complexes. Once they were  
451 bound to a microtubule, they walked towards the minus end in a force-dependent manner. When a  
452 dynein motor reached a minus end, it detached. Furthermore, we implemented a reversible binding  
453 interaction between PCM complexes to make them adhere to each other. Because we were interested  
454 in the spatial arrangement of the PCM complexes, we introduced steric interactions between them.  
455 However, we neglected steric interactions between microtubules to effectively account for the three-  
456 dimensional space that we projected to two dimensions. Simulations of 300 of such PCM complexes  
457 reproducibly reached a steady state in which they formed a compact centrally located cluster (Figure  
458 8A, Video 9A). Quantification of 10 simulations showed that the mean and standard deviation of the  
459 distance from each PCM complex to the average location of all complexes (the center of mass) were  
460 small compared to the radius of the cell (Figure 8E, F). However, if we disabled the adhesive  
461 interactions between PCM complexes, they formed a loose ring-like arrangement and not a compact  
462 cluster (Figure 8B, Video 9B), and the mean and standard deviation of the distance of PCM complexes  
463 to the center of mass were larger (Figure 8E, F). Taken together, our simulations support the idea that  
464 PCM components form a central cluster through positive feedback of dynein molecules carrying them  
465 towards the minus ends of microtubules attached to other PCM proteins, and that adhesive  
466 interactions between the PCM complexes promote cluster compaction.

467 In our experiments, we saw that the presence of CAMSAP2-stabilized microtubule network prevented  
468 PCM clustering (Figure 1D,E, Figure 6A-C), and that CAMSAP2-bound minus ends appeared almost  
469 stationary on the scale of minutes (Video 4) compared to the rapid dynein-driven movement of small  
470 PCM clusters (Video 5). To simulate such a situation, we assumed that 300 microtubules could grow



471 and shrink with random orientations from CAMSAP2-stabilized microtubule ends that were randomly  
472 distributed and stationary within the cell. Furthermore, we assumed that some of the moving PCM  
473 complexes were not efficient in nucleating microtubules, because the presence of a PCM-independent  
474 microtubule population would reduce the concentration of soluble tubulin and thus nucleation  
475 efficiency. To effectively account for such an effect, we allowed only 50 of the 300 PCM complexes to  
476 nucleate microtubules. In this system, the PCM cluster formation was disrupted, and PCM complexes  
477 randomly moved around the cell (Figure 8C, Video 9C). The distributions of the distances to the  
478 average position of the PCM complexes were broad and had a large mean and standard deviation,  
479 indicating the dispersed localization (Figure 8E, F). However, if we increased the strength of adhesive  
480 interactions between the PCM complexes, the randomly oriented microtubule network no longer  
481 suppressed the clustering of PCM complexes (Figure 8D, Video 9D). Therefore, the presence of a  
482 stationary randomly organized microtubule network can be sufficient to block the formation of a  
483 compact PCM cluster even though individual PCM complexes can still move with dynein and adhere  
484 to each other, provided that the interaction between PCM complexes is not too tight.

485 Next, we examined how CAMSAP2-stabilized microtubules would organize when minus-end-directed  
486 kinesin-14 motors could attach to them and carry the minus ends. CAMSAP2-stabilized microtubule  
487 ends bound to kinesin-14 motors (termed “CAMSAP-kin14 complexes” in the text below) were  
488 modelled as a bead with a radius of 50 nm from which a microtubule could grow and to which 6  
489 kinesin-14 molecules were attached. Because the biophysical properties of single plant kinesin-14  
490 molecules used in our assays are poorly understood, we assumed typical kinesin-1 values with an  
491 opposite directionality. CAMSAP-kin14 complexes only interacted sterically but did not adhere to each  
492 other. In a simulation of 300 CAMSAP-kin14 complexes, a loose ring-like arrangement appeared  
493 (Figure 8G), similar to the one observed in our simulations of PCM complexes that could not bind to  
494 each other (Figure 8B). Introducing adhesive interactions between CAMSAP-kin14 complexes was  
495 sufficient to promote compact cluster formation (Figure 8H).

496 Finally, to investigate if a compact cluster of CAMSAP-kin14 complexes would emerge in the presence  
497 of self-associating PCM complexes, we set up simulations with 150 CAMSAP-kin14 complexes together  
498 with 150 adherent PCM complexes. The steady state of such a system displayed a compact central  
499 cluster, in which both types of complexes were mixed (Figure 8I,K,L, Video 9I), while making PCM  
500 complexes non-adhesive prevented cluster compaction (Figure 8J,K,L, Video 9J). Taken together, our  
501 simulations suggest that the PCM complexes provide enough adhesive interactions to compact the  
502 cluster of non-interacting CAMSAP-kin14 and PCM complexes, very similar to our experimental  
503 observations.

## 504 Discussion

505 In this study, we explored the mechanisms of interphase PCM self-assembly in the absence of  
506 centrioles. Our experiments and simulations support the idea that PCM complexes can form a single  
507 cluster through a positive feedback mechanism, whereby dynein motors carry microtubule minus-  
508 ends to other microtubule minus ends (Cytrynbaum et al., 2004). However, for a compact cluster to  
509 emerge, the minus ends must not only be able to move towards each other but also to bind to each  
510 other, and this idea is fully supported by our simulations. Interphase PCM is thus capable both of  
511 dynein binding and self-association sufficient to organize a compact microtubule-nucleating and  
512 anchoring structure in the absence of centrioles. However, the formation of a compact MTOC in  
513 acentriolar cells is slow and less robust than in centriole-containing cells, and the resulting structure  
514 is sensitive to the overall organization of microtubules and to dynein function. This means that  
515 interphase PCM self-association is by itself reversible and not sufficiently tight to resist dynein-driven  
516 forces. Centrioles can thus be regarded as catalysts of PCM assembly and stabilizers of interphase  
517 centrosomes, preventing PCM movement on microtubules oriented with their minus ends away from  
518 the centrosome.

519 Our experimental system allowed us to examine which PCM components are capable of associating  
520 with each other and with dynein to promote microtubule nucleation and anchoring independently of  
521 centrioles. The major scaffold for interphase acentriolar PCM assembly is pericentrin, which can self-  
522 associate (Jiang et al., 2021) and form clusters that recruit CDK5RAP2 and ninein, two proteins known  
523 to bind to pericentrin (Chen et al., 2014; Delaval and Doxsey, 2010; Kim and Rhee, 2014; Lawo et al.,  
524 2012). CDK5RAP2 is important for efficient microtubule nucleation, consistent with its role as an  
525 activator of  $\gamma$ -TuRC (Choi et al., 2010). The same may be true for pericentrin itself (Takahashi et al.,  
526 2002) and, to a lesser extent, for ninein (Delgehyr et al., 2005; Mogensen et al., 2000), which was less  
527 important for microtubule nucleation in our assays. Ninein might be required for promoting minus-  
528 end anchoring, as proposed by previous studies (Abal et al., 2002; Chong et al., 2020; Delgehyr et al.,  
529 2005; Goldspink et al., 2017; Lechler and Fuchs, 2007; Mogensen et al., 2000; Shinohara et al., 2013;  
530 Zheng et al., 2020). The importance of ninein for the formation of caMTOCs highlights its function  
531 within the PCM independent of its role at the centriolar appendages, a major site of ninein localization  
532 at the centrosome (Chong et al., 2020; Delgehyr et al., 2005; Sonnen et al., 2012). Pericentrin can also  
533 directly interact with dynein through the dynein light intermediate chain (Purohit et al., 1999). Ninein  
534 was shown to form a triple complex with dynein and dynactin and activates dynein motility (Redwine  
535 et al., 2017), and an interaction between CDK5RAP2 and dynein has also been reported (Jia et al.,  
536 2013; Lee and Rhee, 2010). All these interactions likely contribute to dynein-dependent PCM  
537 coalescence in the absence of centrioles and also to the function of PCM in microtubule organization,

538 as in the absence of PCM clustering, microtubule density is strongly reduced even though all PCM  
539 proteins are expressed.

540 Pericentrin-dependent MTOC assembly has also been observed in acentriolar mitotic cells (Chinen et  
541 al., 2021; Watanabe et al., 2020), but the interphase pathway displays some interesting differences.  
542 Most notably, CEP192 and its binding partners CEP152 and NEDD1 (Gomez-Ferreria et al., 2012;  
543 Joukov et al., 2014; Kim et al., 2013; Sonnen et al., 2013) were not enriched at caMTOCs, and their  
544 depletion appeared to have no impact on caMTOC formation. This is surprising, because CEP192 is  
545 essential for cell division (Gomez-Ferreria et al., 2007; Joukov et al., 2014; Yang and Feldman, 2015;  
546 Zhu et al., 2008), and in acentriolar cells that rely on pericentrin and CDK5RAP2 for spindle pole  
547 formation, CEP192 is recruited to mitotic pericentrin clusters (Chinen et al., 2021; Watanabe et al.,  
548 2020). Moreover, although NEDD1 is targeted to centrosomes by CEP192, pericentrin can also  
549 contribute to the centrosomal targeting of NEDD1 independently of CEP192 during mitosis (Chi et al.,  
550 2021). However, our data indicate that in interphase, pericentrin and CEP192/NEDD1 are brought  
551 together by centrioles. This conclusion is important for understanding MTOC assembly in  
552 differentiated cells, where centrosome function is suppressed. Strikingly, pericentrin, ninein,  
553 CDK5RAP2 and  $\gamma$ -TuRC are also present in non-centrosomal PCM-based MTOCs at the nuclear  
554 envelope and the Golgi membranes in muscle cells, where they are targeted by AKAP450 (Gimpel et  
555 al., 2017; Oddoux et al., 2013; Vergarajauregui et al., 2020). Recent work also demonstrated that at  
556 the ciliary base of certain types of worm neurons, there is an acentriolar PCM-dependent MTOC that  
557 is formed by the functional counterparts of CDK5RAP2 (SPD-5), pericentrin (PCMD-1) and  $\gamma$ -tubulin,  
558 but lacks CEP192/SPD-2 (Garbrecht et al., 2021; Magescas et al., 2021). The co-assembly of  
559 pericentrin, ninein and CDK5RAP2 counterparts into structures that can promote  $\gamma$ -TuRC-dependent  
560 microtubule nucleation and also anchor minus ends may thus be a general property of interphase  
561 PCM-dependent acentriolar MTOCs. Additionally, the participation of dynein is likely to be a general  
562 feature of acentrosomal microtubule organization, as exemplified by MTOCs formed by the Golgi  
563 apparatus or endosomal membranes (Liang et al., 2020; Zhu and Kaverina, 2013).

564 Our simple cellular system allowed us to dissect the molecular details of acentriolar PCM assemblies.  
565 We found that caMTOCs recruited multiple MAPs and a subset of centriolar proteins. For example,  
566 caMTOCs accumulated several +TIPs, such as CLASPs, CLIP170 and chTOG, though the depletion of  
567 these proteins had no effect on caMTOC formation or function. In contrast, the core components of  
568 the +TIP complexes, EB1 and EB3, were neither enriched in caMTOCs nor required for their assembly.  
569 While the negative results on other +TIPs might be due to their incomplete depletion, EB1 and EB3  
570 function was tested using genetic knockouts, indicating that interphase PCM function is EB-  
571 independent. Among the centriolar proteins, we detected CPAP, CP110 and CEP120 in caMTOCs, and

572 it will be interesting to test whether any of these microtubule-binding factors contribute to  
573 microtubule organization independently of their participation in centriole and centrosome assembly.

574 Furthermore, our work provided insight into the self-assembly properties of interphase PCM. It seems  
575 that while oligomerization and clustering of pericentrin molecules is important for MTOC formation  
576 both in interphase and in mitosis, during mitotic entry, pericentrin forms condensates (Jiang et al.,  
577 2021), while in interphase, pericentrin clusters show no hallmarks of liquid droplets or condensates.  
578 Moreover, the compaction and shape of these acentriolar PCM clusters depend on dynein and  
579 microtubules. While caMTOCs were stable when all microtubules were disassembled, indicating that  
580 attractive interactions between PCM components are sufficient to keep them together, cold  
581 treatment experiments suggested that the cylindrical shape of caMTOCs is likely due to their  
582 association with some stable microtubules. Furthermore, when the number of PCM-unattached stable  
583 minus-end-out microtubules was increased by either nocodazole treatment or by the presence of  
584 CAMSAP2, PCM clusters could no longer form a compact structure but continued to move along  
585 microtubules. Therefore, an important outcome of our study is the key role of stabilized minus ends  
586 in determining interphase PCM organization in the absence of the centrosome. This property may help  
587 to explain how acentrosomal MTOCs form in cells where both PCM proteins and PCM-independent  
588 microtubule stabilizers such as CAMSAPs are present. Two well studied examples of such systems are  
589 the MTOCs at the Golgi membranes and the apical cortex of epithelial cells, where CAMSAPs and PCM  
590 proteins are present simultaneously and may cooperate with each other or play redundant roles  
591 (Goldspink et al., 2017; Nashchekin et al., 2016; Noordstra et al., 2016; Sanchez et al., 2021; Toya et  
592 al., 2016; Wang et al., 2015; Wu et al., 2016; Zhu and Kaverina, 2013). We found that CAMSAP2-  
593 stabilized minus ends can exert a highly dominant effect on PCM organization, and this property likely  
594 explains how the Golgi, which anchors CAMSAP2-stabilized microtubules, recruits PCM and becomes  
595 the major MTOC in cells lacking centrosomes. Importantly, our experiments and simulations showed  
596 that coupling stable minus-ends to a minus-end directed motor is by itself insufficient to form a  
597 compact MTOC, but self-clustering PCM can contribute to this process. Altogether, self-association of  
598 interphase PCM appears to be strong enough to promote its clustering but is sufficiently dynamic to  
599 allow PCM reorganization dependent on other microtubule regulators present in the cell.

600 An interesting question that remains unanswered by our work is the inhibitory role of PLK4 in  
601 interphase caMTOC formation. We did observe caMTOCs in cells depleted of PLK4, indicating that,  
602 unlike cells lacking TRIM37, which form PCM clusters containing catalytically inactive PLK4 (Meitinger  
603 et al., 2020; Yeow et al., 2020), interphase cells studied here do not rely on enzymatically inactive PLK4  
604 for PCM assembly. PLK4 is known to phosphorylate NEDD1 (Chi et al., 2021), and it is possible that the  
605 lack of phosphorylation prevents this  $\gamma$ -TuRC activator and its partners, such as CEP192, from

606 participating in interphase caMTOC assembly. It is, of course, also possible that PLK4 phosphorylation  
607 inhibits the interactions or activities of some of the players driving caMTOC formation. The easy-to-  
608 manipulate cellular model that we have described here will allow these questions to be addressed and  
609 facilitate detailed studies of the interactions and functions of PCM components in nucleating and  
610 stabilizing interphase microtubule minus ends.

## 611 **Materials and Methods**

### 612 ***DNA constructs and protein purification***

613 To generate the lentiviral vector pLVX-GFP-CDK5RAP2-IRES-Puro, pLVX-IRES-Puro plasmid (Clontech)  
614 was digested with AgeI and NotI (FastDigest, Thermo Fisher), and then Gibson Assembly (NEB) was  
615 performed with gel-purified PCR product of GFP-CDK5RAP2 (Wu et al., 2016). To generate pB80-FRB-  
616 TagBFP-GCN4-ppKin14 and pB80-FRB-HA-GCN4-ppKin14, pB80-FRB-GFP-GCN4-ppKin14-VIb was  
617 digested with XbaI and BsrGI (FastDigest, Thermo Fisher), and then TagBFP and HA-tag encoding DNA  
618 fragments were subcloned into the linearized vector by Gibson Assembly.

619 To generate the PX459 with single guide RNA (sgRNA) sequences, pSpCas9(BB)-2A-Puro (PX459) V2.0  
620 (Ran et al., 2013)(purchased from Addgene) was digested with FastDigest BbsI (Thermo Fisher), and  
621 the annealing product of single-strand sgRNA-encoding oligonucleotides was inserted into the linear  
622 PX459 linear vector by T4 ligation (Thermo Fisher). The sgRNA sequences that were used in this study  
623 are: sgRNA targeting AKAP450 5'- gAGGGTTACCTATGGGACTGA -3'; sgRNA targeting CAMSAP2  
624 encoding gene 5'-gCATGATCGATACCCTCATGA-3'; sgRNA targeting p53-encoding gene exon 2 #1 5'-  
625 gCGTCGAGCCCCCTCTGAGTC-3'; sgRNA targeting p53 exon 4 #2 5'-gCCATTGTTCAATATCGTCCG-3';  
626 sgRNA targeting PCNT exon 5 #1 5'-gAGACGGCATTGACGGAGCTG-3'; sgRNA targeting pericentrin-  
627 encoding gene exon 5 #2 5'-GCTCAACAGCCGGCGTGCCC-3'.

628 To generate the GST-DmKHC(1-421)-mNeonGreen construct used for protein purification for motor-  
629 PAINT, the fragment containing amino acids 1 to 421 of the *Drosophila melanogaster* Kinesin Heavy  
630 Chain (DmKHC) was amplified from donor construct DmKHC(1-421)-GFP-6x-His with a C-terminal  
631 mNeonGreen tag by PCR and then cloned into a pGEX vector. The plasmid was transformed into *E. coli*  
632 BL21 cells for purification. Bacteria were cultured until OD<sub>600</sub> ≈ 0.7 and cultures were cooled prior to  
633 inducing protein expression with 0.15 mM IPTG at 18°C overnight. Cells were then pelleted by  
634 centrifugation, snap frozen in liquid nitrogen, and stored at -80°C until use. Cells were rapidly thawed  
635 at 37°C before being resuspended in chilled lysis buffer (phosphate buffered saline (PBS)  
636 supplemented with 5 mM MgCl<sub>2</sub>, 0.5 mM ATP, 0.1% Tween 20, 250 mM NaCl, and 1x complete  
637 protease inhibitor; pH 7.4). Bacteria were lysed by sonication (5 rounds of 30 s) and supplemented  
638 with 5 mM DTT and 2mg/mL lysozyme and then incubated on ice for 45 min. The lysate was clarified  
639 by centrifuging at 26000 xg for 30 minutes before being incubated with equilibrated Glutathione  
640 Sepharose 4B resin for 1.75 hrs. Beads were then pelleted, resuspended in wash buffer (PBS  
641 supplemented with 5 mM MgCl<sub>2</sub>, 0.1% Tween 20, 250 mM NaCl, 1 mM DTT, and 0.5 mM ATP; pH 7.4),  
642 and transferred to a BioRad column. Once settled, the resin was washed with 2 x 10 column volumes  
643 (CV) wash buffer, followed by 1 x 10CV PreScission buffer (50 mM Tris-HCl, 5 mM MgCl<sub>2</sub>, 100mM NaCl,

644 1 mM DTT, 0.5 mM ATP; pH 8.0). The resin was then incubated overnight in 4CV PreScission buffer  
645 with 80U PreScission protease to cleave off the GST tag. The following morning, after allowing the  
646 resin to settle, the eluent was collected, concentrated by spinning through a 3000kDa MWCO filter,  
647 supplemented with an additional 0.1mM ATP, 1mM DTT, and 20% w/v sucrose before flash freezing  
648 in liquid nitrogen, and finally stored at -80°C. Concentration was determined using a Nanodrop. All  
649 steps from lysis onwards were performed at 4°C.

650

### 651 ***Cell culture and drug treatment***

652 hTERT immortalized RPE-1 (RPE1) cell lines were grown in an 1:1 mix of DMEM and F-10 (Lonza) and  
653 Human Embryonic Kidney (HEK) 293T cells line were cultured in DMEM, both supplemented with 10%  
654 fetal bovine serum (FBS, GE Healthcare) and 1% penicillin and streptomycin (Sigma-Aldrich). All cells  
655 were grown in tissue culture polystyrene flasks (Corning) and were maintained in a humidified  
656 incubator at 37°C with 5% CO<sub>2</sub>. Mycoplasma contamination was routinely checked with LT07-518  
657 Mycoalert assay (Lonza).

658 FuGENE 6 (Promega) was used to transfect RPE1 cells with plasmids for generating CRISPR/Cas9  
659 knockouts, immunofluorescence staining and live cell imaging; RNAiMAX (Thermo Fisher Scientific)  
660 was used to transfect RPE1 cells with siRNAs at 20 nM; MaxPEI was used to transfect HEK293T cells  
661 for lentivirus packaging. Transfections were performed according to the manufacturer's instructions  
662 within the recommended reagent/DNA or reagent/siRNA ratio range.

663 We used the following drugs: centrinone B (Tocris Bioscience), nocodazole (Sigma), rapalog (A/C  
664 Heterodimerizer, Takara), dynapyrazole A (Sigma-Aldrich) , BI2536 (Selleckchem), Thymidine (Sigma-  
665 Aldrich), proTAME (Boston Biochem) and Brefeldin A (Peptrotech).

666 To remove centrioles, RPE1 cells were treated with 125 nM centrinone B containing complete medium  
667 for ~10 days, and drug-containing medium was refreshed every 24 hrs; cell confluence was maintained  
668 around ~50-80% during the treatment.

669 For the microtubule disassembly and regrowth assay, the acentriolar RPE1 cells were seeded onto  
670 coverslips in 24-well plates and incubated for 24 hrs, then cells were treated with 10 μM nocodazole  
671 for 1 hr in an incubator (37°C, 5% CO<sub>2</sub>) and followed by another 1 hr treatment at 4°C to achieve  
672 complete disassembly of stable microtubule fragments. Nocodazole washout was then carried out by  
673 at least six washes on ice with ice-cold complete medium; subsequently, plates were moved to a 37°C  
674 water bath and pre-warmed medium was added to each well to allow microtubule regrowth.

675 For cell cycle synchronization, centrinone-treated AKAP450/CAMSAP2/P53 knockout cells were  
676 treated with 5 mM Thymidine (Sigma-Aldrich) overnight, released in centrinone containing medium  
677 for 4 hrs and subsequently treated with 5 $\mu$ M proTAME (Boston Biochem, I-440) for 2 hrs before being  
678 released in centrinone containing medium for 1-4 hrs followed by live imaging and fixation.

679 For the inducible ppKin14-CAMSAP2 heterodimerization experiment, acentriolar cells were seeded  
680 onto coverslips in 24-well plates, cultured with centrinone B containing medium and co-transfected  
681 with 2FKBP-mCherry-CAMSAP2 and FRB-TagBFP-GCN4-ppKin14 vectors. 24 hrs after transfection,  
682 rapalog was added into the medium at a final concentration of 50 nM and incubated overnight for  
683 preparation of fixed cells. For live imaging, rapalog was used at 100 nM.

684

#### 685 ***Lentivirus packaging and generation of transgenic stable cell lines***

686 Lentiviruses were produced by MaxPEI-based co-transfection of HEK293T cells with the transfer  
687 vectors together with the packaging vector psPAX2 and envelope vector pMD2.G (psPAX2 and  
688 pMD2.G were a gift from Didier Trono, Addgene plasmid #12259 and #12260; RRID:Addgene\_12259  
689 and RRID:Addgene\_12260). Supernatant of packaging cells was harvested 48-72 hrs after transfection,  
690 filtered through a 0.45  $\mu$ m filter, incubated with a polyethylene glycol (PEG)-6000-based precipitation  
691 solution overnight at 4°C and centrifuged for 30 minutes at 1500 rpm to concentrate the virus.  
692 Lentiviral pellet was resuspended in PBS.

693 Wild type, AKAP450 and AKAP450/CAMSAP2 knockout RPE1 cells were infected with lentivirus and  
694 incubated in complete medium supplemented with 8  $\mu$ g/ml polybrene (Sigma-Aldrich). After 24 hrs,  
695 the cell medium was replaced with fresh medium. Starting 72 hrs after viral transduction, cells were  
696 subjected to selection with puromycin at a concentration of 25  $\mu$ g/ml for wild-type, 20  $\mu$ g/ml for  
697 AKAP450 knockout and 15  $\mu$ g/ml for AKAP450/CASMAP2 knockout for up to 3 days (until most of the  
698 untransduced control cells, treated with the same concentration of antibiotic, were dead). After  
699 selection, cells were grown in normal medium for 3 days and individual colonies expressing GFP were  
700 isolated into 96-well plates by fluorescence-activated cell sorting (FACS). Sorted single transgenic  
701 stable cell lines were further confirmed by immunofluorescence staining to check the expression level  
702 of GFP-CDK5RAP2 and its colocalization with other centrosomal proteins.

703

#### 704 ***Generation of CRISPR/Cas9 knockout cell lines***

705 The CRISPR/Cas9-mediated knockout of p53-, pericentrin-, AKAP450- and CAMSAP2-encoding genes  
706 was performed as described previously (Ran et al., 2013). In brief, AKAP450/CAMSAP2 knockout RPE1



707 cells (Wu et al., 2016) were transfected with the vectors bearing the appropriate targeting sequences  
708 using FuGENE 6. One day after transfection, the transfected AKAP450/CAMSAP2 knockout RPE1 cells  
709 were subjected to selection with 15 µg/ml puromycin for up to 3 days. After selection, cells were  
710 allowed to recover in normal medium for ~7 days, and knockout efficiency was checked by  
711 immunofluorescence staining. Depending on the efficiency, 50–500 individual clones were isolated  
712 and confirmed by immunofluorescence staining, and the resulted single colonies were characterized  
713 by Western blotting, immunostaining and genome sequencing. AKAP450/CAMSAP2/p53 and  
714 AKAP450/CAMSAP2/MMG/CDK5RAP2/p53 knockout cell lines were generated first and subsequently,  
715 each of them was used to knock out the gene encoding pericentrin. The mutated portions of the p53-  
716 and pericentrin-encoding genes were sequenced using gel-purified PCR products obtained with  
717 primers located in the vicinity of the corresponding sgRNA targeting sites.

718

#### 719 ***Antibodies, immunofluorescence staining and Western blotting***

720 Antibodies used for immunostaining and Western blotting are listed in the Key Reagent or Resource  
721 table. For immunofluorescence cell staining, cultured cells were fixed with –20°C methanol for 5 min  
722 or with 4% paraformaldehyde (PFA) for 12 min at room temperature, rinsed in PBS for 5 min,  
723 permeabilized with 0.15% Triton X-100 in PBS for 2 min, washed 3 times for 5 min with 0.05% Tween-  
724 20 in PBS, sequentially incubated for 20 min in the blocking buffer (2% BSA and 0.05% Tween-20 in  
725 PBS), 1 hr with primary antibodies in the blocking buffer, washed 3 times for 5 min with 0.05% Tween-  
726 20 in PBS, then for 1 hr in secondary antibodies in the blocking buffer, washed 3 times for 5 min with  
727 0.05% Tween-20 in PBS, and air-dried after a quick wash in 96% ethanol. Cells were mounted in  
728 Vectashield mounting medium with or without DAPI (Vector laboratories, Burlingame, CA). Alexa Fluor  
729 -405, -488, -594 and -647 conjugated goat antibodies against rabbit, rat and mouse IgG were used as  
730 secondary antibodies (Molecular Probes, Eugene, OR).

731 For Western blotting, cells were harvested from six-well plates or 10 cm dishes at 90% confluence and  
732 protein extracts were prepared using the lysis buffer containing 20 mM Tris-Cl, pH 7.5, 150 mM NaCl,  
733 0.5 mM EDTA, 1 mM DTT, 1% Triton X-100 or RIPA buffer containing 50 mM Tris-HCl, pH 7.5, 150 mM  
734 NaCl, 1% Triton X-100, 0.5% Sodium Deoxycholate supplemented with protease inhibitor and  
735 phosphatase inhibitors (Roche). Samples were run on polyacrylamide gels, followed by transfer on  
736 0.45 µm nitrocellulose membrane (Sigma-Aldrich). Blocking was performed in 2% BSA in PBS for 30  
737 min at room temperature. The membrane was first incubated with the primary antibodies overnight  
738 at 4°C and washed with 0.05% Tween-20 in PBS 3 times and subsequently incubated with secondary  
739 antibodies for 1 hr at room temperature and washed 3 times with 0.05% Tween-20 in PBS. IRDye

740 800CW/680 LT Goat anti-rabbit and anti-mouse were used as secondary antibodies (Li-Cor  
741 Biosciences, Lincoln, LE) and membranes were imaged on Odyssey CLx infrared imaging system (Image  
742 Studio version 5.2.5, Li-Cor Biosciences).

743

#### 744 ***Imaging and analysis of fixed cells***

745 Images of fixed cells were collected with a Nikon Eclipse Ni upright fluorescence microscope equipped  
746 with a DS-Qi2 CMOS camera (Nikon), an Intensilight C-HGFI epi-fluorescence illuminator (Nikon), Plan  
747 Apo Lambda 100× NA 1.45 or Plan Apo Lambda 60x N.A. 1.40 oil objectives (Nikon) and driven by NIS-  
748 Elements Br software (Nikon).

749 Gated STED imaging was performed with Leica TCS SP8 STED 3X microscope driven by LAS X software  
750 using HC PL APO 100x/1.4 oil STED WHITE objective, white laser (633 nm) for excitation and 775 nm  
751 pulsed laser for depletion. Images were acquired in 2D STED mode with vortex phase mask. Depletion  
752 laser power was equal to 90% of maximum power and an internal Leica HyD hybrid detector with a  
753 time gate of  $1 \leq t_g \leq 8$  ns was used.

754 ImageJ was used for adjustments of intensity levels and contrast, quantification of the  
755 immunofluorescence signal intensity and maximum intensity projections. To analyze PCM clustering  
756 after nocodazole washout in AKAP450/CAMSAP2 knockout RPE1 cells, images were separated into  
757 concentric circular areas using Concentric Circles plugin of ImageJ. The biggest PCM cluster (which  
758 normally also had the highest fluorescence intensity) was selected as the center, around which 20  
759 circles with 2  $\mu$ m inner radius and 20  $\mu$ m outer radius were drawn. Fluorescence intensity of PCM  
760 clusters in these concentric circles was measured automatically and normalized by the sum of the total  
761 PCM intensity in each cell per condition. To quantify the areas occupied by PCM clusters,  
762 immunofluorescence images of fixed cells and time lapse images of live cells were analyzed by drawing  
763 the smallest circle that covered visible PCM clusters to indicate the area occupied by the PCM clusters,  
764 and the diameters of the circles were used for the quantification.

765

#### 766 ***Measurements of microtubule radiality***

767 To analyze microtubule radiality, images of fluorescently labeled microtubules were separated into  
768 radial and non-radial components using a customized ImageJ macro  
769 (<https://github.com/ekatruxha/radialitymap>). First, a local orientation angle map was calculated for  
770 each pixel using the OrientationJ plugin. We used 'cubic spline gradient' method and tensor sigma

771 parameter of 6 pixels (0.4  $\mu\text{m}$ ). The new origin of coordinates was specified by selecting the  
772 centrosome position in the corresponding channel, or the brightest spot in case of centrinone  
773 treatment. Radial local orientation angle was calculated as a difference between the local orientation  
774 angle and the angle of the vector drawn from the new origin of coordinates to the current pixel  
775 position. A radial map image was calculated as an absolute value of the cosine of the radial local  
776 orientation angle at each pixel providing values between zero and one. A non-radial map image was  
777 calculated as one minus the radial map. Both maps were multiplied with the original image to account  
778 for different signal intensities; the two maps illustrate separated radial and non-radial image  
779 components.

780

### 781 ***Live cell imaging and analysis***

782 Live fluorescent imaging was performed with spinning disk confocal microscopy on inverted research  
783 microscope Nikon EclipseTi-E (Nikon), equipped with the Perfect Focus System (Nikon), Nikon Plan  
784 Apo VC 60x NA 1.4 and Nikon Plan Apo VC 100x N.A. 1.40 oil objectives (Nikon) and spinning-disc  
785 confocal scanner unit (CSU-X1-A1, Yokogawa). The system was also equipped with ASI motorized stage  
786 with the piezo top plate MS-2000-XYZ (ASI), Photometrics Evolve 512 EMCCD camera (Photometrics)  
787 and controlled by the MetaMorph 7.8 software (Molecular Devices). Vortran Stradus lasers (405 nm  
788 100 mW, 488 nm 150 mW and 642 nm 165 mW) and Cobolt Jive 561 nm 110 mW laser were used as  
789 the light sources. System was equipped with ET-DAPI (49000), ET-GFP (49002), ET-mCherry (49008)  
790 and ET-Cy5 (49006) filter sets (Chroma). 16-bit images were projected onto the EMCCD chip with the  
791 intermediate lens 2.0X (Edmund Optics) at a magnification of 110 nm per pixel (60x objective) and 67  
792 nm per pixel (100x objective). To keep cells at 37°C and 5% CO<sub>2</sub> we used stage top incubator (INUBG2E-  
793 ZILCS, Tokai Hit). Cells were plated on round 25 mm coverslips, which were mounted in Attofluor Cell  
794 Chamber (Thermo fisher). Cells were imaged with a 2 s interval and 200 ms exposure for 1-3 hrs at  
795 10% laser power.

796 Phase-contrast live cell imaging was performed on a Nikon Ti equipped with a perfect focus system  
797 (Nikon), a super high pressure mercury lamp (C-SHG1, Nikon, Japan), a Plan Apo 60x NA 1.4 (Ph3), a  
798 CoolSNAP HQ2 CCD camera (Photometrics, Tucson, AZ), a motorized stage MS-2000-XYZ with Piezo  
799 Top Plate (ASI, Eugene, OR) and a stage top incubator (Tokai Hit, Japan) for 37°C/5% CO<sub>2</sub> incubation.  
800 The microscope setup was controlled by Micro-manager software. Cells were plated on round 25 mm  
801 coverslips, which were mounted in Attofluor Cell Chamber (Thermo fisher), and imaged with a 1 min  
802 interval for ~24 hrs.

803 For live imaging of nocodazole treatment and washout experiments, cells were incubated with the  
804 medium containing 100 nM SiR-tubulin (Tebu-bio) overnight to image the microtubule network.  
805 Centrinone-treated cells were imaged for a desired period of time prior to the nocodazole treatment,  
806 and then nocodazole was added into the medium at a final concentration of 10  $\mu$ M while imaging  
807 simultaneously. Culture medium was carefully removed when microtubules were completely  
808 depolymerized and washed with prewarmed medium six times to let microtubules regrow. GFP-  
809 CDK5RAP2 and SiR-tubulin imaging was performed with a 2 s interval with 200 ms exposure for 1-3  
810 hrs in total, and maximum intensity projections, contrast adjustment and further processing was  
811 performed using ImageJ.

812

### 813 **FRAP**

814 FRAP experiments were performed on the spinning disc microscope describe above, equipped with  
815 iLas platform and using Targeted Laser Action options of iLas and controlled with iLas software (Roper  
816 Scientific, now Gataca Systems). Photobleaching in the GFP channel was performed with the 488 nm  
817 laser. For the FRAP analysis, Polygon ROIs were set in photobleached and non-bleached regions as  
818 well as in the background. The average fluorescence intensity was measured using ImageJ for each  
819 frame, the background intensity was subtracted from the bleached and non-bleached areas and  
820 normalized to the average of the frames acquired prior to the bleach. The mean fluorescence  
821 intensities of the images before photobleaching were set as 100%, and the subsequent relative  
822 recovery percentages were calculated. Time lapse acquisitions were corrected for drift with the  
823 ImageJ plugins Template Matching.

824

### 825 ***motor-PAINT and analysis***

826 For motor-PAINT, a protocol published previously (Tas et al., 2017) was used, with minor adjustments.  
827 Cells were incubated with 50 nM SiR-tubulin and 500 nM verapamil overnight to allow fields of view  
828 suitable for imaging to be located before the addition of purified GST-DmKHC(1-421)-mNeonGreen.  
829 For nocodazole-treated samples, cells were first incubated with 10  $\mu$ M nocodazole for 15 minutes at  
830 37°C. A single nocodazole-treated or control sample was then transferred to an imaging chamber, and  
831 cells were subjected to extraction for 1 minute in extraction buffer (BRB80: 80 mM K-Pipes, 1 mM  
832 MgCl<sub>2</sub>, 1 mM EGTA; pH 6.8, supplemented with 1M sucrose and 0.15% TritonX-100) pre-warmed to  
833 37°C. Pre-warmed fixation buffer (BRB80 supplemented with 2% PFA) was added to this (i.e. final PFA  
834 concentration of 1%) and the solutions were mixed by gentle pipetting for 1 minute. This buffer was

835 removed and the chamber was washed for 4 times for 1 minute in pre-warmed wash buffer (BRB80  
836 supplemented with 1  $\mu$ M Taxol) before adding imaging buffer (BRB80 supplemented with 583  $\mu$ g/mL  
837 catalase, 42  $\mu$ g/mL glucose oxidase, 1.7% w/v glucose, 1 mM DTT, 1  $\mu$ M Taxol, and 5mM ATP). An  
838 aliquot of GST-DmKHC(1-421)-mNeonGreen motors was warmed, spun in the Airfuge at 20 psi for 5  
839 minutes in a pre-chilled rotor to remove any aggregates, and then transferred to a clean tube prior to  
840 use. Motors were kept on ice and added locally to cells in 0.3  $\mu$ l increments.

841 Imaging was performed immediately after sample preparation at room temperature on a Nikon Ti-E  
842 microscope equipped with a 100x Apo TIRF oil immersion objective (NA. 1.49) and Perfect Focus  
843 System 3 (Nikon). Excitation was achieved with a Lighthub-6 laser combiner (Omicron) containing a  
844 647 nm laser (LuxX 140 mW, Omicron), a 488 nm laser (LuxX 200 mW, Omicron), and optics allowing  
845 for a tunable angle of incidence. Illumination was adjusted for (pseudo-) total internal reflection  
846 fluorescence (TIRF) microscopy. Emission light was separated from excitation light using a quad-band  
847 polychroic mirror (ZT405/488/561/640rpc, Chroma), a quad-band emission filter  
848 (ZET405/488/561/640m, Chroma), and an additional single-band emission filter (ET525/50m for  
849 mNeonGreen emission, Chroma). Detection was achieved using a Hamamatsu Flash 4.0v2 sCMOS  
850 camera. Image stacks were acquired with a 60 ms exposure time, 7% laser power, and 15000-22000  
851 images per field of view. Components were controlled using MicroManager (Edelstein et al., 2014).

852 Acquired stacks were pre-processed using the Faster Temporal Median ImageJ plugin  
853 (<https://github.com/HohlbeinLab/FTM2>; (Jabermoradi et al., 2021)) with a window size of 100 frames.  
854 These stacks were then analyzed using Detection of Molecules (DoM) plugin v.1.2.1 for ImageJ  
855 ([https://github.com/ekatruxha/DoM\\_Utrecht](https://github.com/ekatruxha/DoM_Utrecht)), as has been described previously (Chazeau et al.,  
856 2016; Tas et al., 2017). Each image in an acquired stack is convoluted with a two-dimensional Mexican  
857 hat kernel. The resulting intensity histogram is used to create a thresholded mask based on a cut-off  
858 of three standard deviations above the mean. This mask is then subject to rounds of dilation and  
859 erosion to create a filtered mask used to calculate the centroids on the original image. These centroids  
860 are used as initial values to perform unweighted nonlinear least squares fitting with a Levenberg-  
861 Marquardt algorithm to an asymmetric two-dimensional Gaussian point spread function (PSF),  
862 allowing for the sub-pixel localization of particles.

863 Images were drift-corrected using DoM. The normalized cross-correlation between intermediate  
864 reconstructions of consecutive sub-stacks is used to calculate the drift in x and y between sub-stacks,  
865 which is then linearly interpolated to adjust each individual frame in the stack.

866 Detected particles were linked into tracks again using DoM, which performs a quicker variant of a  
867 nearest neighbor search, with a maximum distance of 5 pixels ( $\sim$ 320nm) between consecutive frames

868 and no permitted frame gap. Tracks were later filtered to remove those shorter than 4 frames or  
869 longer than 200 frames, those in which an angle between parts of the trajectory exceeded 90 degrees,  
870 and those in which the speed of the motor was less than 100nm/s or more than 1500nm/s.

871 The particle table was then split into four particle tables corresponding to the four quadrants of the  
872 image with tracks sorted based on their net displacement (i.e.,  $\Delta x > 0 \wedge \Delta y > 0$ ;  $\Delta x > 0 \wedge \Delta y < 0$ ;  $\Delta$   
873  $x < 0 \wedge \Delta y > 0$ ;  $\Delta x < 0 \wedge \Delta y < 0$ ), as described previously (Tas et al., 2017). These directionality-filtered  
874 particle tables were reconstructed using DoM, creating four super-resolved images of microtubule  
875 segments pointing in a similar direction. These were merged with the reconstructed image of all  
876 localizations to determine the direction of each microtubule segment. Each microtubule was manually  
877 assessed to assign it as being plus-end-in or plus-end-out. Microtubules were manually traced with  
878 lines 4 pixels (80 nm) wide, assigned a color based on their orientation, flattened onto the image,  
879 filtered with a Gaussian Blur of radius 2, and finally merged with the reconstructed image of all  
880 localizations.

881 To quantify the percentage of minus-end-out microtubule length to total microtubule length before  
882 and after nocodazole treatment, the length of each microtubule (determined from kinesin-1  
883 trajectories) in the cell was measured by calculating the Euclidean distance between all subsequent  
884 pairs of points along the microtubule and summed. The ratio was calculated as the total minus-end-  
885 out microtubule length divided by the total microtubule length.

886

### 887 ***Analysis of PCM cluster dynamics***

888 To represent the motion of PCM clusters during nocodazole treatment, ImageJ plugin  
889 KymoResliceWide v.0.4 (<https://github.com/ekatruxha/KymoResliceWide>) was used for generating  
890 kymographs from the time lapse images. The velocity of PCM clusters was measured manually using  
891 kymographs starting from the time point when a small PCM cluster moved out of a caMTOC.  
892 Microtubule density around each PCM cluster was determined by measuring the mean fluorescence  
893 intensity of SiR-tubulin in a circular area with a 2  $\mu$ m radius centered on the PCM cluster and  
894 normalizing it to the mean fluorescence intensity of 20 images prior to nocodazole addition (set as  
895 100%). The moment when a PCM cluster started to move out of the caMTOC was set as the initial time  
896 point (0 min), and the subsequent PCM cluster motion velocity and the relative local microtubule  
897 density at 43 time points were calculated and averaged.

898 The movement trajectories of PCM clusters were generated using ImageJ plugin TrackMate (version  
899 is 6.0.2). The parameters and the settings used were as following: LoG (Laplacian of Gaussian) detector

900 with estimated blob diameter: 14.9  $\mu\text{m}$ ; thresholding value 12.25; sub-pixel localization was selected.  
901 HyperStack Displayer was selected to overlay the spots and tracks on the current hyperstack window.  
902 Simple LAP tracker was selected to track the distance and time with the linking max distance: 32.0  $\mu\text{m}$ ,  
903 gap-closing max distance: 55.0  $\mu\text{m}$  and gap-closing max frame gap: 2. All other parameters and  
904 settings were used as the default.

905

### 906 ***Computer simulations and analysis***

907 Simulations were performed with Cytosim (version June 2019). Cytosim solves a set of Langevin-  
908 equations that describe the movement of flexible cytoskeletal filaments and associated proteins, such  
909 as molecular motors (Nedelec and Foethke, 2007). The numerical values for the parameters are given  
910 in Table S1. The configuration file is provided as Supplemental file 1.

911 We defined the following components in the simulation:

912 *Cell shape:* We considered a two-dimensional system with a circular cell with a radius of 10  $\mu\text{m}$ . As  
913 commonly used in Cytosim simulations, we set the intracellular viscosity to 1 pN s/  $\mu\text{m}^2$ .

914 *Molecular motors:* The binding process of a molecular motor to a microtubule was described by a  
915 binding rate  $k_{\text{on}}$  and the unbinding from the microtubule by a force-dependent unbinding rate  $k_{\text{off}} =$   
916  $k_{\text{off}}^0 \exp(F/F_d)$ . When a motor was engaged with the microtubule it moved along the microtubule with  
917 a linear force-dependent velocity, characterized by  $v(F) = v_0 (1 - F/F_s)$ . Dynein, as well as kinesin-14  
918 motors moved to the minus end of microtubules.

919 *Microtubule filaments:* We used a classical model for microtubule dynamics which is described by a  
920 catastrophe rate, a growth speed, and a shrinkage speed. The growth speed is force-dependent with  
921 a characteristic growing force. For simplicity, we ignored rescue events. The catastrophe rate was set  
922 as  $k_{\text{cat}} = v_g/L_{\text{MT}}$ , in which the mean microtubule length  $L_{\text{MT}}$  was 5  $\mu\text{m}$ . To further restrict the microtubule  
923 length, we set a maximum of 7.5  $\mu\text{m}$ . This limitation was necessary to avoid that long microtubules  
924 were pushing the minus ends to the periphery.

925 *PCM complexes:* We described a PCM complex as a bead with a radius of 50 nm. We randomly placed  
926 one microtubule nucleation site and one dynein on the bead. To effectively account for an unspecific  
927 adhesive interaction between PCM complexes, we introduced two molecules that can bind to each  
928 other. One was implemented as a 10 nm Cytosim fiber and the binding partner as a Cytosim hand with  
929 a binding range of 100 nm, binding rate of 10  $\text{s}^{-1}$ , force-free unbinding rate of 0.01  $\text{s}^{-1}$ , and  
930 characteristic unbinding force of 3 pN. We randomly placed one of each molecule on a PCM complex.  
931 In the simulations with strong adhesive interactions, we increased the number of adhesive binding

932 molecules on the beads and kept all the other parameters the same. We defined five random  
933 attachment points on the beads and placed to each point five molecules. In this setup each PCM  
934 complex was covered with 25 Cytosim binding filaments and 25 Cytosim binding hands. Therefore,  
935 when two PCM complexes were close to each they formed multiple bonds between each other.

936 *CAMSAP-kin14 complexes:* We described a complex consisting of a CAMSAP-stabilized microtubule  
937 end with kinesin 14 motors attached as a Cytosim bead with a radius of 50 nm. We attached five kin14  
938 motors and one microtubule nucleation site randomly on the bead. When we implemented adhesive  
939 interaction between CAMSAP-kin14 complexes, we used exactly the same binding molecules and  
940 arrangements as used for the PCM complexes.

941 *Steric interactions:* In all simulations, we considered steric interaction between the beads which either  
942 describe the PCM complex or the CAMSAP-kin14 complexes. All other steric interactions, except with  
943 the cell boundary were ignored.

944 *Simulations and data analysis:* We set the time step for the simulation to 0.01 s and simulated for a  
945 total of 30 min, after which a definite steady state was reached. For each configuration, we run 10  
946 simulations and analyzed them afterward to obtain statistics on the emerging structures. From the  
947 last frame of the simulation, we obtained all positions of the complexes and calculated the mean  
948 position, which defines the center of mass. We subtracted the center of mass from all positions and  
949 derived all distances of the complexes to the center of mass. For a few examples, we determined the  
950 empirical cumulative distribution of the distances to the center of mass. We used the standard NumPy  
951 functions to determine the mean and standard deviation of the distances to the center of mass for  
952 each simulation.

953

#### 954 ***Statistical analysis***

955 All statistical analyses were performed using GraphPad Prism 9. Statistical details for each experiment  
956 can be found in the corresponding figure legends and supporting files.

957

#### 958 ***Data and software availability***

959 All mentioned ImageJ plugins have source code available and are licensed under open-source GNU  
960 GPL v3 license. The source data for the original Western blots are available within the paper.

961



962 **Acknowledgements**

963 We thank Lynne Cassimeris (Lehigh University, USA), Pierre Gönczy and Didier Trono (EPFL,  
964 Switzerland), Dr. Duane Compton (Geisel School of Medicine at Dartmouth, USA) and Dr. Laurence  
965 Pelletier (Lunenfeld-Tanenbaum Research Institute, Canada) for the gift of materials and Ilya Grigoriev  
966 and Eugene Katrukha (Biology Imaging Center, Utrecht University) for the help with imaging and image  
967 analysis. This work was supported by China Scholarship Council scholarships to Fangrui Chen, Jingchao  
968 Wu and Chao Yang, the Netherlands Organization for Scientific Research Spinoza prize to A.A, as well  
969 as the European Research Council Consolidator Grant 819219 to L.C.K. and the Eindhoven-  
970 Wageningen-Utrecht Alliance ([www.ewuu.nl](http://www.ewuu.nl)) that supports the Center for Living Technologies.

971

972 **Competing financial interests**

973 The authors declare no competing financial interests.

974

975 **References**

- 976 Abal, M., M. Piel, V. Bouckson-Castaing, M. Mogensen, J.B. Sibarita, and M. Bornens. 2002.  
977 Microtubule release from the centrosome in migrating cells. *J Cell Biol.* 159:731-737.
- 978 Akhmanova, A., C.C. Hoogenraad, K. Drabek, T. Stepanova, B. Dortland, T. Verkerk, W. Vermeulen,  
979 B.M. Burgering, C.I. De Zeeuw, F. Grosveld, and N. Galjart. 2001. Clasps are CLIP-115 and -  
980 170 associating proteins involved in the regional regulation of microtubule dynamics in  
981 motile fibroblasts. *Cell.* 104:923-935.
- 982 Balczon, R., C.E. Varden, and T.A. Schroer. 1999. Role for microtubules in centrosome doubling in  
983 Chinese hamster ovary cells. *Cell Motil Cytoskeleton.* 42:60-72.
- 984 Balestra, F.R., A. Dominguez-Calvo, B. Wolf, C. Busso, A. Buff, T. Averink, M. Lipsanen-Nyman, P.  
985 Huertas, R.M. Rios, and P. Gonczy. 2021. TRIM37 prevents formation of centriolar protein  
986 assemblies by regulating Centrobin. *Elife.* 10:e62640.
- 987 Belyy, V., M.A. Schlager, H. Foster, A.E. Reimer, A.P. Carter, and A. Yildiz. 2016. The mammalian  
988 dynein-dynactin complex is a strong opponent to kinesin in a tug-of-war competition. *Nat*  
989 *Cell Biol.* 18:1018-1024.
- 990 Berger, F., S. Klumpp, and R. Lipowsky. 2019. Force-Dependent Unbinding Rate of Molecular Motors  
991 from Stationary Optical Trap Data. *Nano Lett.* 19:2598-2602.
- 992 Brenner, S., F. Berger, L. Rao, M.P. Nicholas, and A. Gennerich. 2020. Force production of human  
993 cytoplasmic dynein is limited by its processivity. *Sci Adv.* 6:eaaz4295.
- 994 Burakov, A., O. Kovalenko, I. Semenova, O. Zhapparova, E. Nadezhdina, and V. Rodionov. 2008.  
995 Cytoplasmic dynein is involved in the retention of microtubules at the centrosome in  
996 interphase cells. *Traffic.* 9:472-480.
- 997 Burakov, A., E. Nadezhdina, B. Slepchenko, and V. Rodionov. 2003. Centrosome positioning in  
998 interphase cells. *J Cell Biol.* 162:963-969.
- 999 Carter, N.J., and R.A. Cross. 2005. Mechanics of the kinesin step. *Nature.* 435:308-312.
- 1000 Cassimeris, L., and J. Morabito. 2004. TOGp, the human homolog of XMAP215/Dis1, is required for  
1001 centrosome integrity, spindle pole organization, and bipolar spindle assembly. *Mol Biol Cell.*  
1002 15:1580-1590.
- 1003 Charrasse, S., M. Schroeder, C. Gauthier-Rouviere, F. Ango, L. Cassimeris, D.L. Gard, and C. Larroque.  
1004 1998. The TOGp protein is a new human microtubule-associated protein homologous to the  
1005 *Xenopus* XMAP215. *J Cell Sci.* 111 ( Pt 10):1371-1383.
- 1006 Chazeau, A., E.A. Katrukha, C.C. Hoogenraad, and L.C. Kapitein. 2016. Studying neuronal microtubule  
1007 organization and microtubule-associated proteins using single molecule localization  
1008 microscopy. *Methods Cell Biol.* 131:127-149.
- 1009 Chen, C.T., H. Hehnly, Q. Yu, D. Farkas, G. Zheng, S.D. Redick, H.F. Hung, R. Samtani, A. Jurczyk, S.  
1010 Akbarian, C. Wise, A. Jackson, M. Bober, Y. Guo, C. Lo, and S. Doxsey. 2014. A unique set of  
1011 centrosome proteins requires pericentrin for spindle-pole localization and spindle  
1012 orientation. *Curr Biol.* 24:2327-2334.
- 1013 Chi, W., G. Wang, G. Xin, Q. Jiang, and C. Zhang. 2021. PLK4-phosphorylated NEDD1 facilitates  
1014 cartwheel assembly and centriole biogenesis initiations. *J Cell Biol.* 220:e202002151.
- 1015 Chinen, T., S. Yamamoto, Y. Takeda, K. Watanabe, K. Kuroki, K. Hashimoto, D. Takao, and D.  
1016 Kitagawa. 2020. NuMA assemblies organize microtubule asters to establish spindle bipolarity  
1017 in acentrosomal human cells. *EMBO J.* 39:e102378.
- 1018 Chinen, T., K. Yamazaki, K. Hashimoto, K. Fujii, K. Watanabe, Y. Takeda, S. Yamamoto, Y. Nozaki, Y.  
1019 Tsuchiya, D. Takao, and D. Kitagawa. 2021. Centriole and PCM cooperatively recruit CEP192  
1020 to spindle poles to promote bipolar spindle assembly. *J Cell Biol.* 220:e202006085.
- 1021 Choi, Y.K., P. Liu, S.K. Sze, C. Dai, and R.Z. Qi. 2010. CDK5RAP2 stimulates microtubule nucleation by  
1022 the gamma-tubulin ring complex. *J Cell Biol.* 191:1089-1095.

- 1023 Chong, W.M., W.J. Wang, C.H. Lo, T.Y. Chiu, T.J. Chang, Y.P. Liu, B. Tanos, G. Mazo, M.B. Tsou, W.N.  
1024 Jane, T.T. Yang, and J.C. Liao. 2020. Super-resolution microscopy reveals coupling between  
1025 mammalian centriole subdistal appendages and distal appendages. *Elife*. 9:e53580.
- 1026 Cizmecioglu, O., M. Arnold, R. Bahtz, F. Settele, L. Ehret, U. Haselmann-Weiss, C. Antony, and I.  
1027 Hoffmann. 2010. Cep152 acts as a scaffold for recruitment of Plk4 and CPAP to the  
1028 centrosome. *Journal of Cell Biology*. 191:731-739.
- 1029 Conduit, P.T., A. Wainman, and J.W. Raff. 2015. Centrosome function and assembly in animal cells.  
1030 *Nat Rev Mol Cell Biol*. 16:611-624.
- 1031 Cytrynbaum, E.N., V. Rodionov, and A. Mogilner. 2004. Computational model of dynein-dependent  
1032 self-organization of microtubule asters. *J Cell Sci*. 117:1381-1397.
- 1033 Delaval, B., and S.J. Doxsey. 2010. Pericentrin in cellular function and disease. *J Cell Biol*. 188:181-  
1034 190.
- 1035 Delgehr, N., J. Sillibourne, and M. Bornens. 2005. Microtubule nucleation and anchoring at the  
1036 centrosome are independent processes linked by ninein function. *J Cell Sci*. 118:1565-1575.
- 1037 Dogterom, M., and B. Yurke. 1997. Measurement of the force-velocity relation for growing  
1038 microtubules. *Science*. 278:856-860.
- 1039 Edelstein, A.D., M.A. Tsuchida, N. Amodaj, H. Pinkard, R.D. Vale, and N. Stuurman. 2014. Advanced  
1040 methods of microscope control using muManager software. *J Biol Methods*. 1:e10.
- 1041 Efimov, A., A. Kharitonov, N. Efimova, J. Loncarek, P.M. Miller, N. Andreyeva, P. Gleeson, N. Galjart,  
1042 A.R. Maia, I.X. McLeod, J.R. Yates, 3rd, H. Maiato, A. Khodjakov, A. Akhmanova, and I.  
1043 Kaverina. 2007. Asymmetric CLASP-dependent nucleation of noncentrosomal microtubules  
1044 at the trans-Golgi network. *Dev Cell*. 12:917-930.
- 1045 Fong, C.S., G. Mazo, T. Das, J. Goodman, M. Kim, B.P. O'Rourke, D. Izquierdo, and M.F. Tsou. 2016.  
1046 53BP1 and USP28 mediate p53-dependent cell cycle arrest in response to centrosome loss  
1047 and prolonged mitosis. *Elife*. 5:e16270.
- 1048 Fong, K.W., Y.K. Choi, J.B. Rattner, and R.Z. Qi. 2008. CDK5RAP2 is a pericentriolar protein that  
1049 functions in centrosomal attachment of the gamma-tubulin ring complex. *Mol Biol Cell*.  
1050 19:115-125.
- 1051 Fu, J.Y., and D.M. Glover. 2012. Structured illumination of the interface between centriole and peri-  
1052 centriolar material. *Open Biology*. 2:120104.
- 1053 Ganem, N.J., and D.A. Compton. 2004. The KinI kinesin Kif2a is required for bipolar spindle assembly  
1054 through a functional relationship with MCAK. *J Cell Biol*. 166:473-478.
- 1055 Ganem, N.J., K. Upton, and D.A. Compton. 2005. Efficient mitosis in human cells lacking poleward  
1056 microtubule flux. *Curr Biol*. 15:1827-1832.
- 1057 Garbrecht, J., T. Laos, E. Holzer, M. Dillinger, and A. Dammermann. 2021. An acentriolar centrosome  
1058 at the *C. elegans* ciliary base. *Curr Biol*. 31:2418-2428.
- 1059 Gartenmann, L., C.C. Vicente, A. Wainman, Z.A. Novak, B. Sieber, J.H. Richens, and J.W. Raff. 2020.  
1060 *Drosophila* Sas-6, Ana2 and Sas-4 self-organise into macromolecular structures that can be  
1061 used to probe centriole and centrosome assembly. *J Cell Sci*. 133:jcs244574.
- 1062 Gavilan, M.P., P. Gandolfo, F.R. Balestra, F. Arias, M. Bornens, and R.M. Rios. 2018. The dual role of  
1063 the centrosome in organizing the microtubule network in interphase. *EMBO Rep*. 19:e45942.
- 1064 Gibeaux, R., A.Z. Politi, P. Philippsen, and F. Nedelec. 2017. Mechanism of nuclear movements in a  
1065 multinucleated cell. *Mol Biol Cell*. 28:645-660.
- 1066 Gimpel, P., Y.L. Lee, R.M. Sobota, A. Calvi, V. Koullourou, R. Patel, K. Mamchaoui, F. Nedelec, S.  
1067 Shackleton, J. Schmoranzler, B. Burke, B. Cadot, and E.R. Gomes. 2017. Nesprin-1alpha-  
1068 Dependent Microtubule Nucleation from the Nuclear Envelope via Akap450 Is Necessary for  
1069 Nuclear Positioning in Muscle Cells. *Curr Biol*. 27:2999-3009.
- 1070 Goldspink, D.A., C. Rookyard, B.J. Tyrrell, J. Gadsby, J. Perkins, E.K. Lund, N. Galjart, P. Thomas, T.  
1071 Wileman, and M.M. Mogensen. 2017. Ninein is essential for apico-basal microtubule  
1072 formation and CLIP-170 facilitates its redeployment to non-centrosomal microtubule  
1073 organizing centres. *Open Biol*. 7:160274.

- 1074 Gomez-Ferreria, M.A., M. Bashkurov, A.O. Helbig, B. Larsen, T. Pawson, A.C. Gingras, and L. Pelletier.  
1075 2012. Novel NEDD1 phosphorylation sites regulate gamma-tubulin binding and mitotic  
1076 spindle assembly. *J Cell Sci.* 125:3745-3751.
- 1077 Gomez-Ferreria, M.A., U. Rath, D.W. Buster, S.K. Chanda, J.S. Caldwell, D.R. Rines, and D.J. Sharp.  
1078 2007. Human Cep192 is required for mitotic centrosome and spindle assembly. *Curr Biol.*  
1079 17:1960-1966.
- 1080 Grigoriev, I., S.M. Gouveia, B. van der Vaart, J. Demmers, J.T. Smyth, S. Honnappa, D. Splinter, M.O.  
1081 Steinmetz, J.W. Putney, Jr., C.C. Hoogenraad, and A. Akhmanova. 2008. STIM1 is a MT-plus-  
1082 end-tracking protein involved in remodeling of the ER. *Curr Biol.* 18:177-182.
- 1083 Gros, O.J., H.G.J. Damstra, L.C. Kapitein, A. Akhmanova, and F. Berger. 2021. Dynein self-organizes  
1084 while translocating the centrosome in T-cells. *Mol Biol Cell.* 32:855-868.
- 1085 Haren, L., M.H. Remy, I. Bazin, I. Callebaut, M. Wright, and A. Merdes. 2006. NEDD1-dependent  
1086 recruitment of the gamma-tubulin ring complex to the centrosome is necessary for centriole  
1087 duplication and spindle assembly. *J Cell Biol.* 172:505-515.
- 1088 Haren, L., T. Stearns, and J. Luders. 2009. Plk1-dependent recruitment of gamma-tubulin complexes  
1089 to mitotic centrosomes involves multiple PCM components. *PLoS One.* 4:e5976.
- 1090 Hoogenraad, C.C., P. Wulf, N. Schiefermeier, T. Stepanova, N. Galjart, J.V. Small, F. Grosveld, C.I. de  
1091 Zeeuw, and A. Akhmanova. 2003. Bicaudal D induces selective dynein-mediated microtubule  
1092 minus end-directed transport. *Embo J.* 22:6004-6015.
- 1093 Jabermoradi, A., S. Yang, M. Gobes, J.P.M. van Duynhoven, and H. J. 2021. Enabling single-molecule  
1094 localization microscopy in turbid food emulsions. *bioRxiv:2021.2003.2003.433739*.
- 1095 Jia, Y., K.W. Fong, Y.K. Choi, S.S. See, and R.Z. Qi. 2013. Dynamic recruitment of CDK5RAP2 to  
1096 centrosomes requires its association with dynein. *PLoS One.* 8:e68523.
- 1097 Jiang, K., S. Hua, R. Mohan, I. Grigoriev, K.W. Yau, Q. Liu, E.A. Katrukha, A.F. Altelaar, A.J. Heck, C.C.  
1098 Hoogenraad, and A. Akhmanova. 2014. Microtubule minus-end stabilization by  
1099 polymerization-driven CAMSAP deposition. *Dev Cell.* 28:295-309.
- 1100 Jiang, X., D.B.T. Ho, K. Mahe, J. Mia, G. Sepulveda, M. Antkowiak, L. Jiang, S. Yamada, and L.E. Jao.  
1101 2021. Condensation of pericentrin proteins in human cells illuminates phase separation in  
1102 centrosome assembly. *J Cell Sci.* 134.
- 1103 Jonsson, E., M. Yamada, R.D. Vale, and G. Goshima. 2015. Clustering of a kinesin-14 motor enables  
1104 processive retrograde microtubule-based transport in plants. *Nat Plants.* 1:15087.
- 1105 Joukov, V., J.C. Walter, and A. De Nicolo. 2014. The Cep192-organized aurora A-Plk1 cascade is  
1106 essential for centrosome cycle and bipolar spindle assembly. *Mol Cell.* 55:578-591.
- 1107 Khodjakov, A., R.W. Cole, B.R. Oakley, and C.L. Rieder. 2000. Centrosome-independent mitotic  
1108 spindle formation in vertebrates. *Curr Biol.* 10:59-67.
- 1109 Kim, S., and K. Rhee. 2014. Importance of the CEP215-pericentrin interaction for centrosome  
1110 maturation during mitosis. *PLoS One.* 9:e87016.
- 1111 Kim, T.S., J.E. Park, A. Shukla, S. Choi, R.N. Murugan, J.H. Lee, M. Ahn, K. Rhee, J.K. Bang, B.Y. Kim, J.  
1112 Loncarek, R.L. Erikson, and K.S. Lee. 2013. Hierarchical recruitment of Plk4 and regulation of  
1113 centriole biogenesis by two centrosomal scaffolds, Cep192 and Cep152. *Proc Natl Acad Sci U*  
1114 *S A.* 110:E4849-4857.
- 1115 Klausner, R.D., J.G. Donaldson, and J. Lippincott-Schwartz. 1992. Brefeldin A: insights into the control  
1116 of membrane traffic and organelle structure. *J Cell Biol.* 116:1071-1080.
- 1117 Klumpp, S., C. Keller, F. Berger, and R. Lipowsky. 2015. Molecular Motors: Cooperative Phenomena  
1118 of Multiple Molecular Motors. *In Multiscale Modeling in Biomechanics and Mechanobiology.*  
1119 S. De, W. Hwang, and E. Kuhl, editors. Springer London, London. 27-61.
- 1120 Kohlmaier, G., J. Loncarek, X. Meng, B.F. McEwen, M.M. Mogensen, A. Spektor, B.D. Dynlacht, A.  
1121 Khodjakov, and P. Gonczy. 2009. Overly Lona Centrioles and Defective Cell Division upon  
1122 Excess of the SAS-4-Related Protein CPAP. *Current Biology.* 19:1012-1018.

- 1123 Kolano, A., S. Brunet, A.D. Silk, D.W. Cleveland, and M.H. Verlhac. 2012. Error-prone mammalian  
1124 female meiosis from silencing the spindle assembly checkpoint without normal  
1125 interkinetochore tension. *Proc Natl Acad Sci U S A*. 109:E1858-1867.
- 1126 Kole, T.P., Y. Tseng, I. Jiang, J.L. Katz, and D. Wirtz. 2005. Intracellular mechanics of migrating  
1127 fibroblasts. *Mol Biol Cell*. 16:328-338.
- 1128 Komarova, Y., G. Lansbergen, N. Galjart, F. Grosveld, G.G. Borisy, and A. Akhmanova. 2005. EB1 and  
1129 EB3 control CLIP dissociation from the ends of growing microtubules. *Mol Biol Cell*. 16:5334-  
1130 5345.
- 1131 Lambrus, B.G., V. Daggubati, Y. Uetake, P.M. Scott, K.M. Clutario, G. Sluder, and A.J. Holland. 2016. A  
1132 USP28-53BP1-p53-p21 signaling axis arrests growth after centrosome loss or prolonged  
1133 mitosis. *J Cell Biol*. 214:143-153.
- 1134 Lansbergen, G., Y. Komarova, M. Modesti, C. Wyman, C.C. Hoogenraad, H.V. Goodson, R.P. Lemaitre,  
1135 D.N. Drechsel, E. van Munster, T.W.J. Gadella Jr., F. Grosveld, N. Galjart, G.G. Borisy, and A.  
1136 Akhmanova. 2004. Conformational changes in CLIP-170 regulate its binding to microtubules  
1137 and dynactin localisation. *J Cell Biol*. 166:1003-1014.
- 1138 Lawo, S., M. Bashkurov, M. Mullin, M.G. Ferreria, R. Kittler, B. Habermann, A. Tagliaferro, I. Poser,  
1139 J.R. Hutchins, B. Hegemann, D. Pinchev, F. Buchholz, J.M. Peters, A.A. Hyman, A.C. Gingras,  
1140 and L. Pelletier. 2009. HAUS, the 8-subunit human Augmin complex, regulates centrosome  
1141 and spindle integrity. *Curr Biol*. 19:816-826.
- 1142 Lawo, S., M. Hasegan, G.D. Gupta, and L. Pelletier. 2012. Subdiffraction imaging of centrosomes  
1143 reveals higher-order organizational features of pericentriolar material. *Nat Cell Biol*.  
1144 14:1148-1158.
- 1145 Lechler, T., and E. Fuchs. 2007. Desmoplakin: an unexpected regulator of microtubule organization in  
1146 the epidermis. *J Cell Biol*. 176:147-154.
- 1147 Lee, K., and K. Rhee. 2011. PLK1 phosphorylation of pericentrin initiates centrosome maturation at  
1148 the onset of mitosis. *J Cell Biol*. 195:1093-1101.
- 1149 Lee, S., and K. Rhee. 2010. CEP215 is involved in the dynein-dependent accumulation of  
1150 pericentriolar matrix proteins for spindle pole formation. *Cell Cycle*. 9:774-783.
- 1151 Letort, G., F. Nedelec, L. Blanchoin, and M. Thery. 2016. Centrosome centering and decentering by  
1152 microtubule network rearrangement. *Mol Biol Cell*. 27:2833-2843.
- 1153 Liang, X., M. Kokes, R.D. Fetter, M.D. Sallee, A.W. Moore, J.L. Feldman, and K. Shen. 2020. Growth  
1154 cone-localized microtubule organizing center establishes microtubule orientation in  
1155 dendrites. *Elife*. 9:e56547.
- 1156 Lin, Y.N., C.T. Wu, Y.C. Lin, W.B. Hsu, C.J. Tang, C.W. Chang, and T.K. Tang. 2013. CEP120 interacts  
1157 with CPAP and positively regulates centriole elongation. *J Cell Biol*. 202:211-219.
- 1158 Luders, J., U.K. Patel, and T. Stearns. 2006. GCP-WD is a gamma-tubulin targeting factor required for  
1159 centrosomal and chromatin-mediated microtubule nucleation. *Nat Cell Biol*. 8:137-147.
- 1160 Magescas, J., S. Eskinazi, M.V. Tran, and J.L. Feldman. 2021. Centriole-less pericentriolar material  
1161 serves as a microtubule organizing center at the base of *C. elegans* sensory cilia. *Curr Biol*.  
1162 31:2410-2417.
- 1163 Martin, M., A. Veloso, J. Wu, E.A. Katrukha, and A. Akhmanova. 2018. Control of endothelial cell  
1164 polarity and sprouting angiogenesis by non-centrosomal microtubules. *Elife*. 7:e33864.
- 1165 Meitinger, F., J.V. Anzola, M. Kaulich, A. Richardson, J.D. Stender, C. Benner, C.K. Glass, S.F. Dowdy,  
1166 A. Desai, A.K. Shiau, and K. Oegema. 2016. 53BP1 and USP28 mediate p53 activation and G1  
1167 arrest after centrosome loss or extended mitotic duration. *J Cell Biol*. 214:155-166.
- 1168 Meitinger, F., M. Ohta, K.Y. Lee, S. Watanabe, R.L. Davis, J.V. Anzola, R. Kabeche, D.A. Jenkins, A.K.  
1169 Shiau, A. Desai, and K. Oegema. 2020. TRIM37 controls cancer-specific vulnerability to PLK4  
1170 inhibition. *Nature*. 585:440-446.
- 1171 Meng, W., Y. Mushika, T. Ichii, and M. Takeichi. 2008. Anchorage of microtubule minus ends to  
1172 adherens junctions regulates epithelial cell-cell contacts. *Cell*. 135:948-959.

- 1173 Mennella, V., D.A. Agard, B. Huang, and L. Pelletier. 2014. Amorphous no more: subdiffraction view  
1174 of the pericentriolar material architecture. *Trends Cell Biol.* 24:188-197.
- 1175 Mennella, V., B. Keszthelyi, K.L. McDonald, B. Chhun, F. Kan, G.C. Rogers, B. Huang, and D.A. Agard.  
1176 2012. Subdiffraction-resolution fluorescence microscopy reveals a domain of the  
1177 centrosome critical for pericentriolar material organization. *Nat Cell Biol.* 14:1159-1168.
- 1178 Mimori-Kiyosue, Y., I. Grigoriev, G. Lansbergen, H. Sasaki, C. Matsui, F. Severin, N. Galjart, F.  
1179 Grosveld, I. Vorobjev, S. Tsukita, and A. Akhmanova. 2005. CLASP1 and CLASP2 bind to EB1  
1180 and regulate microtubule plus-end dynamics at the cell cortex. *J Cell Biol.* 168:141-153.
- 1181 Mogensen, M.M., A. Malik, M. Piel, V. Bouckson-Castaing, and M. Bornens. 2000. Microtubule  
1182 minus-end anchorage at centrosomal and non-centrosomal sites: the role of ninein. *J Cell Sci.*  
1183 113 ( Pt 17):3013-3023.
- 1184 Muroyama, A., and T. Lechler. 2017. Microtubule organization, dynamics and functions in  
1185 differentiated cells. *Development.* 144:3012-3021.
- 1186 Nashchekin, D., A.R. Fernandes, and D. St Johnston. 2016. Patronin/Shot Cortical Foci Assemble the  
1187 Noncentrosomal Microtubule Array that Specifies the Drosophila Anterior-Posterior Axis.  
1188 *Dev Cell.* 38:61-72.
- 1189 Nedelec, F., and D. Foethke. 2007. Collective Langevin dynamics of flexible cytoskeletal fibers. *New*  
1190 *Journal of Physics.* 9:427-427.
- 1191 Nijenhuis, W., M.M.P. van Grinsven, and L.C. Kapitein. 2020. An optimized toolbox for the  
1192 optogenetic control of intracellular transport. *J Cell Biol.* 219:e201907149.
- 1193 Noordstra, I., Q. Liu, W. Nijenhuis, S. Hua, K. Jiang, M. Baars, S. Remmelzwaal, M. Martin, L.C.  
1194 Kapitein, and A. Akhmanova. 2016. Control of apico-basal epithelial polarity by the  
1195 microtubule minus-end-binding protein CAMSAP3 and spectraplakins ACF7. *J Cell Sci.*  
1196 129:4278-4288.
- 1197 Oddoux, S., K.J. Zaal, V. Tate, A. Kenea, S.A. Nandkeolyar, E. Reid, W. Liu, and E. Ralston. 2013.  
1198 Microtubules that form the stationary lattice of muscle fibers are dynamic and nucleated at  
1199 Golgi elements. *J Cell Biol.* 203:205-213.
- 1200 Ohashi, K.G., L. Han, B. Mentley, J. Wang, J. Fricks, and W.O. Hancock. 2019. Load-dependent  
1201 detachment kinetics plays a key role in bidirectional cargo transport by kinesin and dynein.  
1202 *Traffic.* 20:284-294.
- 1203 Paz, J., and J. Luders. 2017. Microtubule-Organizing Centers: Towards a Minimal Parts List. *Trends*  
1204 *Cell Biol:*S0962-8924(0917)30187-30183.
- 1205 Pollock, R., R. Issner, K. Zoller, S. Natesan, V.M. Rivera, and T. Clackson. 2000. Delivery of a stringent  
1206 dimerizer-regulated gene expression system in a single retroviral vector. *Proc Natl Acad Sci U*  
1207 *S A.* 97:13221-13226.
- 1208 Prosser, S.L., and L. Pelletier. 2020. Centriolar satellite biogenesis and function in vertebrate cells. *J*  
1209 *Cell Sci.* 133:jcs239566.
- 1210 Purohit, A., S.H. Tynan, R. Vallee, and S.J. Doxsey. 1999. Direct interaction of pericentrin with  
1211 cytoplasmic dynein light intermediate chain contributes to mitotic spindle organization. *J*  
1212 *Cell Biol.* 147:481-492.
- 1213 Pyrpassopoulos, S., H. Shuman, and E.M. Ostap. 2020. Modulation of Kinesin's Load-Bearing Capacity  
1214 by Force Geometry and the Microtubule Track. *Biophys J.* 118:243-253.
- 1215 Raff, J.W. 2019. Phase Separation and the Centrosome: A Fait Accompli? *Trends Cell Biol.* 29:612-  
1216 622.
- 1217 Ran, F.A., P.D. Hsu, J. Wright, V. Agarwala, D.A. Scott, and F. Zhang. 2013. Genome engineering using  
1218 the CRISPR-Cas9 system. *Nat Protoc.* 8:2281-2308.
- 1219 Redwine, W.B., M.E. DeSantis, I. Hollyer, Z.M. Htet, P.T. Tran, S.K. Swanson, L. Florens, M.P.  
1220 Washburn, and S.L. Reck-Peterson. 2017. The human cytoplasmic dynein interactome  
1221 reveals novel activators of motility. *Elife.* 6:e28257.
- 1222 Rios, R.M. 2014. The centrosome-Golgi apparatus nexus. *Philos Trans R Soc Lond B Biol Sci.*  
1223 369:20130462.

- 1224 Rivero, S., J. Cardenas, M. Bornens, and R.M. Rios. 2009. Microtubule nucleation at the cis-side of  
1225 the Golgi apparatus requires AKAP450 and GM130. *EMBO J.* 28:1016-1028.
- 1226 Sallee, M.D., and J.L. Feldman. 2021. Microtubule organization across cell types and states. *Curr Biol.*  
1227 31:R506-R511.
- 1228 Sanchez, A.D., T.C. Branon, L.E. Cote, A. Papagiannakis, X. Liang, M.A. Pickett, K. Shen, C. Jacobs-  
1229 Wagner, A.Y. Ting, and J.L. Feldman. 2021. Proximity labeling reveals non-centrosomal  
1230 microtubule-organizing center components required for microtubule growth and  
1231 localization. *Curr Biol.* 31:3586-3600 e3511.
- 1232 Schlager, M.A., A. Serra-Marques, I. Grigoriev, L.F. Gumy, M. Esteves da Silva, P.S. Wulf, A.  
1233 Akhmanova, and C.C. Hoogenraad. 2014. Bicaudal d family adaptor proteins control the  
1234 velocity of Dynein-based movements. *Cell Rep.* 8:1248-1256.
- 1235 Schmidt, T.I., J. Kleylein-Sohn, J. Westendorf, M. Le Clech, S.B. Lavoie, Y.D. Stierhof, and E.A. Nigg.  
1236 2009. Control of centriole length by CPAP and CP110. *Curr Biol.* 19:1005-1011.
- 1237 Shinohara, H., N. Sakayori, M. Takahashi, and N. Osumi. 2013. Ninein is essential for the  
1238 maintenance of the cortical progenitor character by anchoring the centrosome to  
1239 microtubules. *Biol Open.* 2:739-749.
- 1240 Sonnen, K.F., A.M. Gabryjonczyk, E. Anselm, Y.D. Stierhof, and E.A. Nigg. 2013. Human Cep192 and  
1241 Cep152 cooperate in Plk4 recruitment and centriole duplication. *J Cell Sci.* 126:3223-3233.
- 1242 Sonnen, K.F., L. Schermelleh, H. Leonhardt, and E.A. Nigg. 2012. 3D-structured illumination  
1243 microscopy provides novel insight into architecture of human centrosomes. *Biology Open.*  
1244 1:965-976.
- 1245 Spektor, A., W.Y. Tsang, D. Khoo, and B.D. Dynlacht. 2007. Cep97 and CP110 suppress a cilia  
1246 assembly program. *Cell.* 130:678-690.
- 1247 Splinter, D., M.E. Tanenbaum, A. Lindqvist, D. Jaarsma, A. Flotho, K.L. Yu, I. Grigoriev, D. Engelsma,  
1248 E.D. Haasdijk, N. Keijzer, J. Demmers, M. Fornerod, F. Melchior, C.C. Hoogenraad, R.H.  
1249 Medema, and A. Akhmanova. 2010. Bicaudal D2, dynein and kinesin-1 associate with nuclear  
1250 pore complexes and regulate centrosome and nuclear positioning during mitotic entry. *PLoS*  
1251 *Biol.* 8:e1000350.
- 1252 Steinman, J.B., C.C. Santarossa, R.M. Miller, L.S. Yu, A.S. Serpinskaya, H. Furukawa, S. Morimoto, Y.  
1253 Tanaka, M. Nishitani, M. Asano, R. Zalyte, A.E. Ondrus, A.G. Johnson, F. Ye, M.V. Nachury, Y.  
1254 Fukase, K. Aso, M.A. Foley, V.I. Gelfand, J.K. Chen, A.P. Carter, and T.M. Kapoor. 2017.  
1255 Chemical structure-guided design of dynapyrazoles, cell-permeable dynein inhibitors with a  
1256 unique mode of action. *Elife.* 6:e25174.
- 1257 Stolz, A., N. Ertych, and H. Bastians. 2015. A phenotypic screen identifies microtubule plus end  
1258 assembly regulators that can function in mitotic spindle orientation. *Cell Cycle.* 14:827-837.
- 1259 Takahashi, M., A. Yamagiwa, T. Nishimura, H. Mukai, and Y. Ono. 2002. Centrosomal proteins CG-  
1260 NAP and kendrin provide microtubule nucleation sites by anchoring gamma-tubulin ring  
1261 complex. *Mol Biol Cell.* 13:3235-3245.
- 1262 Tanaka, N., W. Meng, S. Nagae, and M. Takeichi. 2012. Nezha/CAMSAP3 and CAMSAP2 cooperate in  
1263 epithelial-specific organization of noncentrosomal microtubules. *Proc Natl Acad Sci U S A.*  
1264 109:20029-20034.
- 1265 Tang, C.J.C., R.H. Fu, K.S. Wu, W.B. Hsu, and T.K. Tang. 2009. CPAP is a cell-cycle regulated protein  
1266 that controls centriole length. *Nat Cell Biol.* 11:825-831.
- 1267 Tas, R.P., A. Chazeau, B.M.C. Cloin, M.L.A. Lambers, C.C. Hoogenraad, and L.C. Kapitein. 2017.  
1268 Differentiation between Oppositely Oriented Microtubules Controls Polarized Neuronal  
1269 Transport. *Neuron.* 96:1264-1271.
- 1270 Tibelius, A., J. Marhold, H. Zentgraf, C.E. Heilig, H. Neitzel, B. Ducommun, A. Rauch, A.D. Ho, J.  
1271 Bartek, and A. Kramer. 2009. Microcephalin and pericentrin regulate mitotic entry via  
1272 centrosome-associated Chk1. *J Cell Biol.* 185:1149-1157.

- 1273 Toya, M., S. Kobayashi, M. Kawasaki, G. Shioi, M. Kaneko, T. Ishiuchi, K. Misaki, W. Meng, and M.  
1274 Takeichi. 2016. CAMSAP3 orients the apical-to-basal polarity of microtubule arrays in  
1275 epithelial cells. *Proc Natl Acad Sci U S A*. 113:332-337.
- 1276 Vergarajauregui, S., R. Becker, U. Steffen, M. Sharkova, T. Esser, J. Petzold, F. Billing, M.S. Kapiloff, G.  
1277 Schett, I. Thievensen, and F.B. Engel. 2020. AKAP6 orchestrates the nuclear envelope  
1278 microtubule-organizing center by linking golgi and nucleus via AKAP9. *Elife*. 9:e61669.
- 1279 Vinopal, S., M. Cernohorska, V. Sulimenko, T. Sulimenko, V. Vosecka, M. Flemr, E. Draberova, and P.  
1280 Draber. 2012. gamma-Tubulin 2 nucleates microtubules and is downregulated in mouse  
1281 early embryogenesis. *PLoS One*. 7:e29919.
- 1282 Wang, G., Q. Chen, X. Zhang, B. Zhang, X. Zhuo, J. Liu, Q. Jiang, and C. Zhang. 2013. PCM1 recruits  
1283 Plk1 to the pericentriolar matrix to promote primary cilia disassembly before mitotic entry. *J*  
1284 *Cell Sci*. 126:1355-1365.
- 1285 Wang, S., D. Wu, S. Quintin, R.A. Green, D.K. Cheerambathur, S.D. Ochoa, A. Desai, and K. Oegema.  
1286 2015. NOCA-1 functions with gamma-tubulin and in parallel to Patronin to assemble non-  
1287 centrosomal microtubule arrays in *C. elegans*. *Elife*. 4:e08649.
- 1288 Watanabe, S., F. Meitinger, A.K. Shiau, K. Oegema, and A. Desai. 2020. Centriole-independent  
1289 mitotic spindle assembly relies on the PCNT-CDK5RAP2 pericentriolar matrix. *J Cell Biol*.  
1290 219:e202006010.
- 1291 Wong, Y.L., J.V. Anzola, R.L. Davis, M. Yoon, A. Motamedi, A. Kroll, C.P. Seo, J.E. Hsia, S.K. Kim, J.W.  
1292 Mitchell, B.J. Mitchell, A. Desai, T.C. Gahman, A.K. Shiau, and K. Oegema. 2015. Cell biology.  
1293 Reversible centriole depletion with an inhibitor of Polo-like kinase 4. *Science*. 348:1155-  
1294 1160.
- 1295 Woodruff, J.B., B. Ferreira Gomes, P.O. Widlund, J. Mahamid, A. Honigmann, and A.A. Hyman. 2017.  
1296 The Centrosome Is a Selective Condensate that Nucleates Microtubules by Concentrating  
1297 Tubulin. *Cell*. 169:1066-1077.
- 1298 Wu, J., C. de Heus, Q. Liu, B.P. Bouchet, I. Noordstra, K. Jiang, S. Hua, M. Martin, C. Yang, I. Grigoriev,  
1299 E.A. Katrukha, A.F. Altelaar, C.C. Hoogenraad, R.Z. Qi, J. Klumperman, and A. Akhmanova.  
1300 2016. Molecular Pathway of Microtubule Organization at the Golgi Apparatus. *Dev Cell*.  
1301 39:44-60.
- 1302 Yang, C., J. Wu, C. de Heus, I. Grigoriev, N. Liv, Y. Yao, I. Smal, E. Meijering, J. Klumperman, R.Z. Qi,  
1303 and A. Akhmanova. 2017. EB1 and EB3 regulate microtubule minus end organization and  
1304 Golgi morphology. *J Cell Biol*. 216:3179-3198.
- 1305 Yang, R., and J.L. Feldman. 2015. SPD-2/CEP192 and CDK Are Limiting for Microtubule-Organizing  
1306 Center Function at the Centrosome. *Curr Biol*. 25:1924-1931.
- 1307 Yeow, Z.Y., B.G. Lambrus, R. Marlow, K.H. Zhan, M.A. Durin, L.T. Evans, P.M. Scott, T. Phan, E. Park,  
1308 L.A. Ruiz, D. Moralli, E.G. Knight, L.M. Badder, D. Novo, S. Haider, C.M. Green, A.N.J. Tutt, C.J.  
1309 Lord, J.R. Chapman, and A.J. Holland. 2020. Targeting TRIM37-driven centrosome  
1310 dysfunction in 17q23-amplified breast cancer. *Nature*. 585:447-452.
- 1311 Zheng, Y., R.A. Buchwalter, C. Zheng, E.M. Wight, J.V. Chen, and T.L. Megraw. 2020. A perinuclear  
1312 microtubule-organizing centre controls nuclear positioning and basement membrane  
1313 secretion. *Nat Cell Biol*. 22:297-309.
- 1314 Zhu, F., S. Lawo, A. Bird, D. Pinchev, A. Ralph, C. Richter, T. Muller-Reichert, R. Kittler, A.A. Hyman,  
1315 and L. Pelletier. 2008. The mammalian SPD-2 ortholog Cep192 regulates centrosome  
1316 biogenesis. *Curr Biol*. 18:136-141.
- 1317 Zhu, X.D., and I. Kaverina. 2013. Golgi as an MTOC: making microtubules for its own good.  
1318 *Histochemistry and Cell Biology*. 140:361-367.

1319



1320 **Figure legends.**

1321 **Figure 1. Formation and characterization of caMTOCs in AKAP450/CAMSAP2 knockout cells**

1322 (A) Immunofluorescence images of control or centrinone-treated wild type (WT) RPE1 cells stained for  
1323 centrioles (CEP135, red; centrin, green). The zooms of the boxed area show the centrioles stained with  
1324 the indicated markers.

1325 (B) Quantification shows the percentage of cells with centrioles before and after the centrinone  
1326 treatment. 350 cells (n=7 fields of view) analyzed for each measurement in three independent  
1327 experiments. The statistical significance was determined by unpaired two-tailed Mann-Whitney test  
1328 in Prism 9.1 (\*\*p<0.001). Values represent mean±SD.

1329 (C) Immunofluorescence images of centrinone-treated WT RPE1 cells stained for pericentrin (PCNT,  
1330 green) and the Golgi marker GM130 (red). Inset shows the merged image of the boxed area.

1331 (D) Diagrams of the microtubule organization in WT and knockout (KO) cells used.

1332 (E) Immunofluorescence images of control and centrinone-treated WT and knockout RPE1 cell lines  
1333 stained for pericentrin (green) and microtubules ( $\alpha$ -tubulin, red). Enlargements on the right show the  
1334 boxed areas.

1335 (F) Immunofluorescence images of centrinone-treated AKAP450/CAMSAP2 knockout RPE1 cells  
1336 stained for different PCM components as indicated and imaged by STED microscopy.

1337 (G) Quantification of the length and width of cylindrical PCM clusters. n=65 cells analyzed in three  
1338 independent experiments. Values represent mean±SD.

1339 (H) (Top left) Two frames of time-lapse images of centrinone-treated AKAP450/CAMSAP2 knockout  
1340 RPE1 cells stably expressing GFP-CDK5RAP2 prior to FRAP experiments. (Top right) Schemes show  
1341 regions of caMTOC where photobleaching was performed. (Middle) Kymographs illustrating  
1342 fluorescence of unbleached caMTOC (No FRAP), fully photobleached caMTOC (Whole FRAP) and  
1343 partially photobleached caMTOC (Partial FRAP). (Bottom) Time-lapse images illustrating partial FRAP  
1344 of a caMTOC. Time is min:sec.

1345 (I) Normalized fluorescence intensity as a function of time. The blue line shows averaged intensity  
1346 traces of unbleached caMTOCs (No FRAP), the black line shows averaged intensity traces of fully  
1347 photobleached caMTOCs (Whole FRAP), the red line shows averaged intensity traces of whole  
1348 caMTOC that were partially photobleached (whole caMTOC intensity, Partial FRAP) and the green line  
1349 shows averaged intensity traces of the photobleached region of the partially photobleached caMTOC  
1350 (FRAP region intensity, Partial FRAP). n=3 for No FRAP, 3 for Whole FRAP, 5 for Partial FRAP (whole

1351 caMTOC intensity) and 5 for Partial FRAP (FRAP region intensity); time-lapse images of ~1600  
1352 timepoints with 2 s interval were analyzed for each measurement. Values are mean±SD.

1353

1354 **Figure 2. Molecular composition of caMTOCs in AKAP450/CAMSAP2 knockout cells**

1355 All the cells used in this figure are AKAP450/CAMSAP2 knockout cells, except for panel E as indicated.

1356 (A-C) Immunofluorescence images of control or centrinone-treated AKAP450/CAMSAP2 knockout  
1357 RPE1 cells stained for and depleted of the indicated proteins.

1358 (D, F-I) Immunofluorescence images of centrinone-treated AKAP450/CAMSAP2 knockout RPE1 cells  
1359 stained for and depleted of the indicated proteins.

1360 (E) Immunofluorescence images of centrinone-treated AKAP450/CAMSAP2/p53 knockout and  
1361 AKAP450/CAMSAP2/p53/pericentrin knockout RPE1 cells stained as indicated.

1362 In panels A-I, insets show enlargements of the merged channels of the boxed areas, and dashed lines  
1363 indicate cell edges.

1364 (J) Quantification of the main PCM organization types, as described in Figure 1- figure supplement 2A,  
1365 for cells prepared as described in panel A-C, E-I. Numbers on the histogram show the percentages.  
1366 1293 (-CentB), 1547(+CentB), 2021(siLuci), 1822(siCEP152), 1345(siCEP192), 1161(siNEDD1), 2302  
1367 (AKAP450/CAMSAP2/p53/PCNT knockout (PCNT KO)), 2264(siCDK5RAP2), 2510(siy-tubulin),  
1368 2408(siNIN) and 2526(siDHC) cells were analyzed for each measurement in three independent  
1369 experiments (n=3). Values represent mean±SD.

1370 (K) Summarizing table of PCM localization and the depletion effects on caMTOC formation in  
1371 AKAP450/CAMSAP2 knockout RPE1 cells. NT, not tested.

1372

1373 **Figure 3. Microtubule organization in acentriolar cells missing different caMTOC components**

1374 (A) Immunofluorescence images of centrinone-treated AKAP450/CAMSAP2 knockout RPE1 cells  
1375 depleted of the indicated proteins and stained for microtubules ( $\alpha$ -tubulin, red) and different PCM  
1376 proteins (green). Insets show enlargements of the merged channels of the boxed areas and dashed  
1377 lines show cell boundaries.

1378 (B) Quantification of the normalized overall microtubule intensity for the indicated conditions. The  
1379 number of cells analyzed in three independent experiments: n=56 (siLuci), 45 (siPCNT), 33

1380 (siCDK5RAP2), 36 (siNinein), 43 (si $\gamma$ -tubulin) and 28 (siDHC). The statistical significance was  
1381 determined by unpaired two-tailed Mann-Whitney test in Prism 9.1 (\*\* $p < 0.001$ ). Values represent  
1382 mean  $\pm$  SD.

1383 (C) Microtubule images were split into a radial and non-radial components (heat maps) based on  
1384 microtubule orientation in relation to the PCM clusters or the brightest point, as described in  
1385 Methods.

1386 (D) Quantification of the proportion of the non-radial microtubules shown in panel C (see Methods  
1387 for details). The number of cells analyzed for each measurement in three independent experiments:  
1388  $n = 25$  (siLuci), 43 (siPCNT), 32 (siCDK5RAP2), 34 (siNinein), 37 (si $\gamma$ -tubulin) and 25 (siDHC). The  
1389 statistical significance was determined by unpaired two-tailed Mann-Whitney test in Prism 9.1  
1390 (\*\* $p < 0.001$ ). Values represent mean  $\pm$  SD.

1391 (E) Diagram illustrating the distribution of PCM clusters and microtubule organization upon the  
1392 depletion of the indicated proteins in centrinone-treated AKAP450/CAMSAP2 knockout cells.

1393

#### 1394 **Figure 4. Microtubule- and dynein-dependent disassembly of caMTOCs**

1395 (A) Diagram illustrating different order of cell treatments with nocodazole (Noco) and/or dynapyrazole  
1396 A (Dyna, 5  $\mu$ M) and the time points when the cells were fixed.

1397 (B) Immunofluorescence staining of centrinone-treated AKAP450/CAMSAP2 knockout cells treated as  
1398 shown in panel A. Dashed red circles represent the areas occupied by PCM clusters in each condition.

1399 (C) Quantification of the area occupied by PCM clusters in each condition, as shown in panels A and B.  
1400  $n = 35-53$  cells analyzed for each measurement in three independent experiments. The statistical  
1401 significance was determined by unpaired two-tailed Mann-Whitney test in Prism 9.1 (not significant  
1402 (NS),  $P < 0.12$ ; \* $P < 0.033$ ; \*\* $P < 0.001$ ). Values are represented as mean  $\pm$  SD.

1403 (D) Western blot showing that 3 hrs treatment with dynapyrazole A does not affect the expression of  
1404 the endogenous dynein heavy chain and the dynactin large subunit p150Glued.

1405 (E) Time-lapse images of centrinone-treated AKAP450/CAMSAP2 knockout RPE1 cells stably  
1406 expressing GFP-CDK5RAP2. Microtubules were visualized by treating cells with 100 nM SiR-tubulin  
1407 overnight. Red arrows show the immobilized PCM clusters at indicated timepoints. Time is min:sec.  
1408 Time-lapse images of the same cell prior to the nocodazole treatment were shown in Figure 1 - figure  
1409 supplement 3B.

1410 (F) (Top) Kymograph illustrating the motility of PCM clusters during microtubule disassembly with  
1411 nocodazole. (Bottom) Measurements of the normalized microtubule (SiR-tubulin) fluorescence  
1412 intensity (red plot, left Y-axis) and the instantaneous velocity of GFP-CDK5RAP2 clusters (green plot,  
1413 right Y-axis) during the movement of GFP-CDK5RAP2 clusters away from caMTOC. Microtubule density  
1414 around each PCM cluster was determined by measuring mean fluorescence intensity of SiR-tubulin in  
1415 a circular area with a 2  $\mu\text{m}$  radius centered on the PCM cluster and normalizing it to the mean  
1416 fluorescence intensity of 20 images prior to nocodazole addition (set as 100%). The moment when a  
1417 PCM cluster started to move out of the caMTOC was set as the initial time point (0 min) for this cluster,  
1418 and the subsequent PCM cluster motion velocity and the relative local microtubule density of 43 time  
1419 points were calculated and averaged.  $n=12$  clusters were analyzed in each condition. Values are  
1420 represented as mean $\pm$ SD.

1421 (G) Motor-PAINT images of centrinone-treated AKAP450/CAMSAP2 knockout RPE1 cells before and  
1422 after nocodazole treatment. Plus-end-out microtubules are shown in white whereas minus-end-out  
1423 microtubules are shown in magenta. Asterisks represent the putative position of caMTOC.

1424 (H) Summarizing diagram illustrating microtubule organization and the motility of GFP-CDK5RAP2-  
1425 positive PCM clusters during nocodazole treatment and dynapyrazole A (treat first) and nocodazole  
1426 co-treatment.

1427 (I) Immunofluorescence images of centrinone-treated AKAP450/CAMSAP2 knockout RPE1 cells  
1428 stained for microtubules ( $\alpha$ -tubulin, red) and PCM (PCNT, green). Enlargements show the merged and  
1429 single channels of the boxed areas.

1430

### 1431 **Figure 5. Dynamics of microtubule nucleation and caMTOC re-assembly in acentriolar cells**

1432 (A) Immunofluorescence images of microtubule regrowth after nocodazole washout at the indicated  
1433 timepoints in centrinone-treated AKAP450/CAMSAP2 knockout RPE1 cells stained for PCM  
1434 components (green) and newly nucleated microtubules (EB1, red). A Golgi marker, GM130 (blue), is  
1435 included in the left row, and zooms of the boxed regions (numbered 1 and 2) show that microtubules  
1436 nucleate from PCM clusters but not from the Golgi membranes. Dashed lines show cell boundaries.

1437 (B) (Top) Timeline shows the time course of protein depletion (siRNA transfection), nocodazole  
1438 treatment, nocodazole washout and microtubule regrowth. (Bottom) Immunofluorescence images of  
1439 microtubule regrowth experiments after depletion of the indicated proteins in centrinone-treated  
1440 AKAP450/CAMSAP2 knockout RPE1 cells stained for the indicated PCM markers (green) and EB1 as a

1441 marker of nascent microtubules (red). Cell outlines are indicated with dashed lines and enlargements  
1442 of the merged channels of the boxed areas are shown on the right.

1443 (C) Quantification of normalized microtubule intensity at 30 s after nocodazole washout in control  
1444 cells and cells depleted of the indicated PCM proteins. n=40 (siLuci, siPCNT), 57 (siCDK5RAP2), 48  
1445 (siNIN), 45 (si $\gamma$ -tubulin) and 50 (siDHC) cells analyzed for each measurement in three independent  
1446 experiments. The statistical significance was determined by unpaired two-tailed Mann-Whitney test  
1447 in Prism 9.1 (\*\* $P < 0.002$ ; \*\*\* $P < 0.001$ ). Values are represented as mean $\pm$ SD.

1448 (D) Time-lapse images of centrinone-treated AKAP450/CAMSAP2 knockout RPE1 cells stably  
1449 expressing GFP-CDK5RAP2 before and after nocodazole washout. Dispersed GFP-CDK5RAP2-positive  
1450 PCM clusters (GFP, green) serve as microtubule nucleation sites (SiR-tubulin, red) and coalesce into a  
1451 big cluster after nocodazole washout. Time is min:sec.

1452 (E) Immunofluorescence images of centrinone-treated AKAP450/CAMSAP2 knockout RPE1 cells  
1453 stained for pericentrin (green) and microtubules ( $\alpha$ -tubulin, red) at the indicated timepoints after  
1454 nocodazole washout.

1455 (F) Measurements of normalized fluorescence intensity of PCM clusters at the indicated distances in  
1456 relation to the brightest point, as described in Methods. The biggest PCM cluster (which normally also  
1457 had the highest fluorescence intensity) was selected as the center, around which 10 concentric circles  
1458 with 2  $\mu$ m width were drawn. Fluorescence intensity of PCM clusters in these concentric circles was  
1459 measured automatically and normalized by the sum of the total PCM intensity in each cell per  
1460 condition. n=12 cells per plot per timepoint. Values represent mean $\pm$ SD.

1461 (G) Summarizing diagram illustrating microtubule organization and motility of GFP-CDK5RAP2-positive  
1462 PCM clusters during nocodazole washout.

1463

1464 **Figure 6. caMTOC formation in the presence of CAMSAP2 using inducible motor recruitment**

1465 (A) Immunofluorescence images of control or centrinone treated AKAP450 knockout RPE1 cells  
1466 stained for CAMSAP2 (green), PCM protein ( $\gamma$ -tubulin, cyan) and microtubules ( $\alpha$ -tubulin, red).  
1467 Enlargements show the boxed regions of the merged images.

1468 (B) Time lapse images of centrinone treated AKAP450 knockout RPE1 cells stably expressing GFP-  
1469 CDK5RAP2 (green). Microtubules were labeled with 100 nM SiR-tubulin overnight (red, top row). The  
1470 maximum intensity projection includes 200 frames, 200 ms/frame. Red arrows show the motion  
1471 directions of GFP-CDK5RAP2-positive PCM clusters. Time is min:sec.

1472 (C) A diagram of microtubule organization and PCM motility in AKAP450 knockout cells.  
1473 (D, E) Diagram of the inducible heterodimerization assay with ppKin14 and CAMSAP2. (D) CAMSAP2  
1474 was tagged with mCherry and fused to a tandemly repeated FKBP domain; tetramerized ppKin14 was  
1475 tagged with TagBFP and fused to FRB. Rapalog induces the binding of CAMSAP2 and ppKin14 by linking  
1476 FKBP to FRB. (E) Rapalog treatment induces the binding of CAMSAP2 (red) and ppKin14 (blue) and the  
1477 formation of radial microtubule network. In this scheme, PCM-anchored microtubules are not shown.  
1478 (F) Immunofluorescence images of centrinone-treated AKAP450/CAMSAP2 knockout RPE1 cells co-  
1479 transfected with 2FKBP-mCherry-CAMSAP2 and FRB-TagBFP-GCN4-ppKin14 and stained for the  
1480 indicated proteins in cells treated with DMSO or rapalog. Zooms show the magnifications of boxed  
1481 areas.  
1482 (G) Quantification of the proportion of cells with a radial, whirlpool-like or non-radial microtubule  
1483 organization with and without rapalog treatment. Numbers on the histogram show the percentages.  
1484 414 cells treated with DMSO (-Rapa) and 385 cells treated with rapalog (+Rapa) analyzed for each  
1485 measurement in three independent experiments (n=3). Values represent mean±SD.

1486

1487 **Figure 7. The role of the PCM in CAMSAP2-driven formation of caMTOCs**

1488 (A,B) Immunofluorescence images of centrinone-treated AKAP450/CAMSAP2/p53/pericentrin  
1489 knockout RPE1 cells transfected with 2FKBP-mCherry-CAMSAP2 and FRB-TagBFP-GCN4-ppKi14 and  
1490 stained for the indicated components before (top) or after an overnight rapalog treatment. Zooms  
1491 show magnifications of boxed areas. Black dashed lines show the position of the nucleus.

1492 (C) Cells treated as described for panel A were co-transfected with GFP-pericentrin and stained for  
1493 mitochondria (cytochrome C, red) and CAMSAP2 (red) in same channel overnight after rapalog  
1494 addition. Zooms show magnifications of boxed areas.

1495 (D) Quantification of the proportion of cells with different types of microtubule minus end  
1496 organization before and after overnight rapalog treatment. Numbers on the histogram show the  
1497 percentages. 334 (-Rapa), 424(+Rapa) cells of AKAP450/CAMSAP2/p53/pericentrin knockout RPE1  
1498 cells, 206(-Rapa) and 239(+Rapa) of AKAP450/CAMSAP2/CDK5RAP2/MMG/p53/pericentrin knockout  
1499 RPE1 cells analyzed for each measurement in three independent experiments (n=3). Values represent  
1500 mean±SD.

1501 (E) Immunofluorescence images of centrinone-treated  
1502 AKAP450/CAMSAP2/CDK5RAP2/MMG/p53/pericentrin knockout RPE1 cells transfected with 2FKBP-

1503 mCherry-CAMSAP2 and FRB-TagBFP-GCN4-ppKi14 and stained for microtubules ( $\alpha$ -tubulin, green)  
1504 after an overnight rapalog treatment. Zooms show magnifications of boxed areas.

1505

1506 **Figure 8. Cytosim simulations of PCM and microtubule self-organization.**

1507 In all simulations, we considered a circular cell with a radius of 10  $\mu\text{m}$  (gray line), containing  
1508 microtubules (red), PCM complexes (green), and CAMSAP-kin14 complexes (blue).

1509 (A) Simulation of 300 PCM complexes; each PCM complex is attached to a dynein motor, and from  
1510 each complex, a MT can grow. A weak adhesive interaction is introduced between the PCM complexes.  
1511 A compact PCM cluster is observed.

1512 (B) The same simulation as in (A), but with the adhesive interaction disabled; PCM is organized in a  
1513 ring-like structure.

1514 (C) The simulation in (A) modified in two ways: a randomly organized, dynamic microtubule network  
1515 with 300 filaments is added, and only 50 of the 300 PCM complexes can nucleate microtubules. PCM  
1516 cluster formation is disrupted.

1517 (D) The same simulation as in (C), but the strength of the adhesive interaction is increased. The  
1518 formation of a compact cluster is recovered.

1519 (E) Cumulative distributions of distances of the PCM complexes to the average position (the center of  
1520 mass), determined from the last frame of the simulations.

1521 (F) The mean and standard deviation (SD) of the distances of the PCM complexes to the center of mass  
1522 from different repetitions of the simulations. Each system was simulated 10 times. Small values for  
1523 the mean and for the standard deviation indicate a compact cluster. For a ring-like structure, the mean  
1524 values are larger and describe the radius of the ring. A dispersed localization of PCM complexes is  
1525 characterized by large values for the mean and the standard deviation.

1526 (G) Simulation of 300 CAMSAP-kin14 complexes, which consist of a microtubule nucleation site and  
1527 five kinesin-14 motors, but do not adhere to each other. The complexes form a ring-like structure.

1528 (H) The same simulation as in (G), but with complexes that have the same weak adhesive interaction  
1529 as for the PCM complexes in (A). The complexes form a central compact cluster.

1530 (I) Simulation of a mixed system with 150 CAMSAP-kin14 complexes that do not adhere to each other  
1531 and 150 weakly adhesive PCM complexes. All complexes associate in a central compact cluster.

- 1532 (J) The same simulation as in (I), but with non-adhesive PCM complexes. A ring-like structure is formed.
- 1533 (K) Cumulative distributions of the distances from all complexes to the center of mass of the last frame  
1534 of the simulation.
- 1535 (L) The mean and standard deviation of the distances from all complexes to the center of mass from  
1536 different repetitions of the simulations. Each system was simulated 10 times. A compact cluster is  
1537 characterized by a small value for the mean and for the standard deviation. A ring-like structure has a  
1538 larger mean value.



1539 **Legends to Supplemental Figures**

1540 **Figure 1 – figure supplement 1. Characterization of caMTOCs in wild type, AKAP450 knockout and**  
1541 **CAMSAP2 knockout cells**

1542 (A) Immunofluorescence images of centrinone B treated AKAP450 knockout RPE1 cells stained for  
1543 CAMSAP2 (green) and  $\gamma$ -tubulin (red), transfected either with control (Luciferase) or CAMSAP2 siRNAs.  
1544 Insets show enlargements of the merged images of the boxed areas.

1545 (B) Quantification of CAMSAP2 depletion and caMTOC formation related to panel A. For normalized  
1546 CAMSAP2 intensity, n=76 (siLuciferase) and 62 (siCAMSAP2) cells from three independent experiment  
1547 were analyzed; to calculate the percentage of cells showing dispersed or clustered PCM, n=300  
1548 (siLuciferase) and 299 (siCAMSAP2) cells analyzed for each measurement in three independent  
1549 experiments. The statistical significance was determined by unpaired two-tailed Mann-Whitney test  
1550 in Prism 9.1 (\*\*p<0.001). Values represent mean $\pm$ SD.

1551 (C-E) Immunofluorescence images of wild type and CAMSAP2 knockout cells treated with DMSO,  
1552 CentB, Brefeldin A (BFA) (5  $\mu$ g/ml (17.8  $\mu$ M) for 2 hrs), and stained for centrioles (Centrin, red), PCM  
1553 (PCNT, green), microtubules ( $\alpha$ -tubulin, red) and Golgi apparatus (GM130, blue). Insets show  
1554 enlargements of the merged channels of the boxed areas.

1555 (F) Quantification of the proportion of cells with different types of microtubule minus end organization  
1556 in wild type (WT) and CAMSAP2 knockout RPE1 cell lines with indicated treatment. 319 (+DMSO),  
1557 413(+CentB), 412(+BFA), 353(+CentB+BFA) WT cells and 340(+DMSO), 445(+CentB), 384(+BFA),  
1558 553(+CentB+BFA) CAMSAP2 knockout RPE1 cells analyzed for each measurement in three  
1559 independent experiments (n=3). Values represent mean $\pm$ SD.

1560

1561 **Figure 1 – figure supplement 2. Characterization of caMTOCs in AKAP450/CAMSAP2 knockout cells**

1562 (A) Immunofluorescence images of control (-CentB) and centrinone-treated AKAP450/CAMSAP2  
1563 knockout RPE1 cells stained for pericentrin and centrin to show the main PCM organization types  
1564 (centrin-negative cells with cylindrical or round PCM cluster, dispersed PCM or no cluster, and centrin-  
1565 positive centrosomes) in each condition. Enlargements of the merged channels of the boxed areas are  
1566 shown on the right.

1567 (B) Quantification of the main PCM organization types in centrinone-treated AKAP450 knockout and  
1568 AKAP450/CAMSAP2 knockout RPE1 cells. Numbers on the histogram show the percentages. 465

1569 (AKAP450 KO) and 495 (AKAP450/CAMSAP2 KO) cells analyzed for each measurement in three  
1570 independent experiments (n=3). Values represent mean±SD.

1571 (C) Diagram showing the generation of CPAP or PLK4 depleted AKAP450/CAMSAP2 knockout RPE1  
1572 cells with different drug treatments. Cells were transfected with siRNAs to depleted CPAP and PLK4  
1573 respectively. After 2 days, the transfection was performed again to increase the depletion efficiency.  
1574 After 2 more days, cells were treated with thymidine to block cell proliferation or with a combination  
1575 of thymidine and centrinone B, or thymidine, centrinone B and the PLK1 inhibitor BI 2536 for one or  
1576 three days. Cells were fixed for the first time (Fix1) after a 24 hr drug treatment, and for the second  
1577 time (Fix2) after a 72 hr drug treatment.

1578 (D) Quantification of the main PCM organization types, as described in panel A, for cells prepared as  
1579 described in panel E-G. Numbers on the histogram show the percentages and numbers in brackets  
1580 show cells analyzed for each measurement in three independent experiments (n=3; 247-612 cells  
1581 analyzed per condition). Values represent mean±SD.

1582 (E-G) Immunofluorescence images of Fix2 (as described in panel C) showing control (transfected with  
1583 siRNA against Luciferase), or depleted of PLK4 or CPAP and treated as indicated. Cells were stained for  
1584 centrioles (CEP135, centrin), PCM proteins (PCNT) and microtubules ( $\alpha$ -tubulin). Images illustrate the  
1585 PCM organization types in each condition. Insets show the merged channels of the boxed areas.

1586

### 1587 **Figure 1 – figure supplement 3. PCM dynamics visualized with GFP-CDK5RAP2**

1588 (A) Immunofluorescence images of control (-CentB) and centrinone B treated WT RPE1 cell stably  
1589 expressing GFP-CDK5RAP2 (green) stained for  $\alpha$ -tubulin (red) and pericentrin (PCNT, blue). Zooms  
1590 show enlargements of the boxed regions.

1591 (B) Time-lapse images of centrinone-treated AKAP450/CAMSAP2 knockout RPE1 cells stably  
1592 expressing GFP-CDK5RAP2. Microtubules are visualized by treating the cells with 100 nM SiR-tubulin  
1593 overnight. PCM labeled with GFP-CDK5RAP2 (green) forms a stable cluster that functions as the MTOC.  
1594 Zooms show the enlarged GFP channel of the boxed regions. Time is min:sec.

1595

### 1596 **Figure 2 – figure supplement 1. Characterization of PCM components localizing to caMTOCs in** 1597 **AKAP450/CAMSAP2 knockout cells**

1598 (A) Western blot showing that endogenous NEDD1 and CEP192 are present in centrinone-treated  
1599 AKAP450/CAMSAP2 knockout cells.

1600 (B) Western blot results showing the depletion of the indicated PCM proteins.

1601 (C) Immunofluorescence images of centrinone-treated AKAP450/CAMSAP2 knockout RPE1 cells  
1602 showing the localization and the effects of depletion of the indicated proteins on the caMTOCs. siRNA  
1603 against luciferase was used as a control. Zooms show enlargements of the merged channels of the  
1604 boxed areas.

1605

1606 **Figure 2 – figure supplement 2. Generation of the AKAP450/CAMSAP2/p53/pericentrin knockout**  
1607 **RPE1 cell line**

1608 (A) Diagram illustrating two sgRNA sites targeting p53 exon 2 and exon 4. The green and red boxes  
1609 indicate the position of the PAM sites, and the predicted Cas9 cut sites are indicated by scissors.

1610 (B,C) Genotyping results of the genomic mutation using gel-purified PCR product which covers exon 2  
1611 and exon 4 of the p53-encoding gene in AKAP450/CAMSAP2/p53 knockout cell line and a diagram  
1612 illustrating the induced inversion.

1613 (D) Diagram illustrating the binding sites of p53 antibodies and the position of the mutation induced  
1614 in p53-encoding gene.

1615 (E,F) Immunofluorescence and Western blot images showing p53 expression in control and  
1616 AKAP450/CAMSAP2/p53 knockout cells.

1617 (G-H) Genotyping results of the genomic mutation using gel-purified PCR product which covers the  
1618 two sgRNAs targeting sites within pericentrin-encoding gene in AKAP450/CAMSAP2/p53/pericentrin  
1619 knockout cell line and a diagram illustrating the induced genomic mutations within exon 5 of the  
1620 pericentrin-encoding gene. The green and red boxes indicate the position of the PAM sites, and the  
1621 predicted Cas9 cut sites are indicated by scissors.

1622 (I) Diagram illustrating the binding domain of the pericentrin antibody and the positions of the  
1623 mutations induced downstream of the Cas9 cutting sites.

1624 (J) Immunofluorescence images confirming the loss of pericentrin in  
1625 AKAP450/CAMSAP2/p53/pericentrin knockout cells.

1626 (K) Western blot confirming the loss of p53 and pericentrin in AKAP450/CAMSAP2/p53/pericentrin  
1627 knockout cells.

1628

1629 **Figure 2 – figure supplement 3. Characterization of cell division in centrinone-treated**  
1630 **AKAP450/CAMSAP2/p53 knockout cells**

1631 (A) Immunofluorescence images of metaphase AKAP450/CAMSAP2/p53 knockout cells treated with  
1632 DMSO and centrinone (CentB) and stained for h microtubules ( $\alpha$ -tubulin, magenta), PCM (PCNT, red),  
1633 centrioles (Centrin, green) and DNA (DAPI, blue).

1634 (B-C) Phase-contrast time-lapse images of centrinone-treated AKAP450/CAMSAP2/p53 knockout  
1635 RPE1 cells. Time is hh:mm. (B) The red and blue arrows show two cells with different mitosis duration.  
1636 (C) Mitotic phases in a representative cell.

1637 (D) Quantification of the mitosis duration of centrinone-treated AKAP450/CAMSAP2/p53 knockout  
1638 RPE1 cells. 36 cells from 14 videos were analyzed. Values represent mean $\pm$ SD.

1639

1640 **Figure 2 – figure supplement 4. Characterization of PCM organization in AKAP450/CAMSAP2/p53/**  
1641 **pericentrin knockout cells**

1642 (A) Immunofluorescence images of centrinone-treated AKAP450/CAMSAP2/p53 knockout (Control)  
1643 and AKAP450/CAMSAP2/p53/pericentrin knockout (PCNT KO) RPE1 cells showing staining for the  
1644 indicated proteins. Zooms of the boxed areas show merged channels.

1645 (B) Western blots showing the expression levels of CDK5RAP2,  $\gamma$ -tub, and ninein in control (+DMSO)  
1646 and centrinone-treated (+CentB) AKAP450/CAMSAP2/p53 knockout and  
1647 AKAP450/CAMSAP2/p53/PCNT knockout RPE1 cells.

1648

1649 **Figure 2 – figure supplement 5. Effects of the depletion or knockout of EB1 and EB3 on caMTOC**  
1650 **formation in AKAP450/CAMSAP2 knockout cells**

1651 (A) Immunofluorescence images of centrinone-treated AKAP450/CAMSAP2 knockout cells stained for  
1652 EB1 or EB3 and pericentrin showing effects of EB1 or EB3 depletion on caMTOCs.

1653 (B) Western blot confirming the loss of AKAP450 and CAMSAP2 in AKAP450/CAMSAP2/EB1/EB3  
1654 mutant cells.

1655 (C) Immunofluorescence images of control or centrinone-treated AKAP450/CAMSAP2/EB1/EB3  
1656 mutant RPE1 cells stained for the indicated proteins. Zooms of the boxed areas show merged  
1657 channels.

1658

1659 **Figure 4 – Figure supplement 1. PCM dynamics during nocodazole treatment in centrinone-treated**  
1660 **AKAP450/CAMSAP2 knockout cells**

1661 (A) Time-lapse images illustrating the dynamics of GFP-CDK5RAP2 clusters (green, white arrows) and  
1662 microtubules (visualized with an overnight treatment with 100 nM SiR-tubulin, red) during nocodazole  
1663 treatment. A single frame of the whole cell is on the bottom left, with the boxed area indicating the  
1664 location of the enlarged images. Time is min:sec.

1665 (B) (Top) Motor-PAINT images of centrinone-treated AKAP450/CAMSAP2 knockout RPE1 cells before  
1666 and after treatment with 10  $\mu$ M nocodazole for 15 min (the same cells, colorized differently, are  
1667 displayed in Figure 4G). Microtubule segments were assigned a color based on their absolute  
1668 orientation, with their plus-ends pointing in the directions indicated with the compass. Asterisks  
1669 indicate approximate assumed positions of caMTOCs. (Bottom) Directionality-filtered reconstruction  
1670 of motor tracks used for generating the Motor-PAINT images.

1671 (C) Immunofluorescence images of centrinone-treated AKAP450/CAMSAP2 knockout RPE1 cells  
1672 stained for microtubules ( $\alpha$ -tubulin, red) and PCM (PCNT, green) after cold treatment for 30 min at  
1673 4°C. Enlargements show the merged and single channels of the boxed areas.

1674

1675 **Figure 5 – figure supplement 1. PCM dynamics and microtubule regrowth during nocodazole**  
1676 **washout in AKAP450/CAMSAP2 knockout cells**

1677 (A) Immunofluorescence images of control (+DMSO) and centrinone-treated AKAP450/CAMSAP2  
1678 knockout cells treated with cold alone or cold and nocodazole, and stained for nascent microtubules  
1679 (EB1, red), PCM (PCNT, green) and the Golgi apparatus (GM130, blue) 30 s after nocodazole washout.

1680 (B) Immunofluorescence images of acentriolar AKAP450/CAMSAP2 knockout RPE1 cells fixed at 30 s  
1681 and 10 min after nocodazole washout and stained for the indicated markers. Zooms show the  
1682 enlargements of boxed areas. Dashed lines show the cell boundaries.

1683 (C) Summarizing table showing the presence of PCM components in clusters (including centrosome  
1684 and caMTOC) before and after nocodazole washout in indicated conditions.

1685 (D) Immunofluorescence images of control acentriolar AKAP450/CAMSAP2 knockout RPE1 cells and  
1686 cells lacking the indicated PCM proteins fixed 2 min after nocodazole washout and stained for EB1 (a  
1687 marker of growing microtubules, red) and different PCM proteins ( $\gamma$ -tubulin, ninein (NIN) and dynein  
1688 heavy chain (DHC), green; CDK5RAP2 and PCNT, blue). Insets show the enlargements of the boxed

1689 areas and the heat maps on the right show the radial and non-radial part of growing microtubules.  
1690 Dashed lines show the cell boundaries.

1691 (E) Quantification of the proportion of non-radial microtubules 2 min after nocodazole washout. The  
1692 radial and the non-radial microtubule intensities were measured and the non-radial microtubule  
1693 intensity was normalized by dividing it by the sum of the radial and the non-radial microtubule  
1694 intensities for each group. n=20-25 cells analyzed for each measurement in three independent  
1695 experiments. The statistical significance was determined by unpaired two-tailed Mann-Whitney test  
1696 in Prism 9.1 (\*\*p<0.001). Values represent mean±SD.

1697 (F) Diagram showing microtubule regrowth and PCM assembly in control acentriolar  
1698 AKAP450/CAMSAP2 knockout RPE1 cells and cells depleted of the indicated PCM proteins at 30 s and  
1699 2 min after nocodazole washout.

1700

1701 **Figure 5 – figure supplement 2. Pericentrin is required for PCM clustering in acentriolar**  
1702 **AKAP450/CAMSAP2 knockout RPE1 cells**

1703 Time-lapse images of centrinone-treated AKAP450/CAMSAP2 knockout RPE1 cells stably expressing  
1704 GFP-CDK5RAP2 (green), which is diffusely distributed and does not form any clear clusters.  
1705 Microtubule regrowth experiments show random nucleation of microtubules (labeled with 100nM  
1706 SiR-tubulin overnight) that remain disorganized. Summarizing diagram shows PCM clusters and  
1707 microtubule network in the indicated conditions.

1708

1709 **Figure 6 – figure supplement 1. PCM dynamics and the effects of CAMSAP2 clustering on PCM**  
1710 **organization in centrinone-treated RPE1 cells lacking AKAP450**

1711 (A) Time-lapse images illustrating the dynamics of PCM clusters (green, white arrows) and  
1712 microtubules (SiR-tubulin, red) after nocodazole washout in centrinone-treated AKAP450 knockout  
1713 RPE1 cells stably expressing GFP-CDK5RAP2. A single frame of the whole cell with numbered boxed  
1714 areas indicating the location of enlarged time-lapse images is shown on the left. White arrows indicate  
1715 moving PCM clusters after microtubules re-grow. Time is min:sec.

1716 (B) Time-lapse images of centrinone-treated AKAP450 knockout RPE1 cells stably expressing GFP-  
1717 CDK5RAP2. GFP-CDK5RAP2 forms small clusters that are dynamic before microtubules (SiR-tubulin,  
1718 red) are disassembled by nocodazole treatment. Red arrows show that these clusters become  
1719 immobile when microtubules are completely depolymerized (enlargements of the boxed areas shown

1720 in the bottom rows). GFP-CDK5RAP2-positive clusters are sites of microtubule nucleation after  
1721 nocodazole washout and become dynamic again once microtubules re-grow. The maximum intensity  
1722 projections include 100 or 400 frames, 200 ms/frame. Time is min:sec.

1723 (C) Summarizing diagram illustrating microtubule organization and the motility of PCM clusters in  
1724 acentriolar AKAP450 knockout RPE1 cells.

1725 (D) Movement trajectories of PCM clusters in acentriolar AKAP450 knockout cells before and after 1  
1726 hr treatment with 5 $\mu$ M dynapyrazole A (Dyna). 350 frames with a 2 s interval from the same cell were  
1727 analyzed. Shaded areas represent the cell body.

1728 (E) Quantification of the length of the trajectories of moving PCM clusters. n=132 (without  
1729 dynapyrazole A, from 5 cells) and 111 (after 1 hr dynapyrazole A treatment, from 4 cells) trajectories  
1730 were analyzed for each condition. The statistical significance was determined by unpaired two-tailed  
1731 Mann-Whitney test in Prism 9.1 (\*\*p<0.001). Values represent mean $\pm$ SD.

1732 (F) Immunofluorescence images of centrinone-treated AKAP450/CAMSAP2 knockout RPE1 cells  
1733 transfected with 2FKBP-mCherry-CAMSAP2 and FRB-TagBFP-GCN4-ppKin14 and stained for the  
1734 indicated proteins after overnight rapalog treatment. Zooms show the magnification of boxed area.

1735

1736 **Figure 6 – figure supplement 2. Pericentrin is required for PCM clustering in acentriolar AKAP450**  
1737 **knockout RPE1 cells**

1738 Time-lapse images of centrinone-treated AKAP450 knockout RPE1 cells stably expressing GFP-  
1739 CDK5RAP2 (green) depleted of pericentrin. GFP-CDK5RAP2 is diffusely distributed and does not form  
1740 any clear clusters. Microtubule regrowth experiments show random nucleation of microtubules  
1741 (labeled with 100nM SiR-tubulin overnight) that remain disorganized. Summarizing diagram shows  
1742 PCM clusters and microtubule network in the indicated conditions.

1743

1744 **Figure 7 – figure supplement 1. Inducible CAMSAP2-driven microtubule rearrangement in**  
1745 **AKAP450/CAMSAP2/p53/pericentrin knockout cell**

1746 Immunofluorescence images of centrinone-treated AKAP450/CAMSAP2/p53/pericentrin knockout  
1747 cells expressing either FKBP-mCh-CAMSAP2 alone, FRB-GFP-ppKin14 alone or both, with or without  
1748 rapalog treatment, and stained for microtubules ( $\alpha$ -tubulin). Enlargements show the merged channels  
1749 of the boxed areas.

1750

1751 **Figure 7 – figure supplement 2. Inducible CAMSAP2-driven radial microtubule rearrangement in**  
1752 **AKAP450/CAMSAP2/p53/pericentrin knockout cell**

1753 (A) Time-lapse images of a centrinone-treated AKAP450/CAMSAP2/p53/pericentrin knockout cell  
1754 transiently expressing 2FKBP-mCherry-CAMSAP2 and FRB-GFP-GCN4-ppKin14 imaged for 10 min (100  
1755 frames, 6 s interval) prior to treatment with 100 nM rapalog and ~90 min after. Time is hr: min: sec.

1756 (B) Immunofluorescence images of centrinone-treated AKAP450/CAMSAP2/p53/pericentrin knockout  
1757 and AKAP450/CAMSAP2/MMG/CDK5RAP2/p53/pericentrin knockout RPE1 cells, stained for the  
1758 indicated markers. In the upper row, the cells were neither transfected nor treated with rapalog,  
1759 whereas in the other panels, cells were transfected with 2FKBP-mCherry-CAMSAP2 and FRB-HA-  
1760 GCN4-ppKin14 and treated with rapalog overnight. Zooms show the magnification of boxed areas.

1761

1762 **Figure 7 – figure supplement 3. Generation of the AKAP450/CAMSAP2/CDK5RAP2/MMG/**  
1763 **p53/pericentrin knockout RPE1 cell line**

1764 (A) Diagram illustrating two sgRNA sites targeting p53 exon 4. The green and red boxes indicate the  
1765 position of the PAM sites, and the predicted Cas9 cut sites are indicated by scissors. Genotyping results  
1766 of the genomic mutation using gel-purified PCR product which covers exon 4 of the p53-encoding gene  
1767 in AKAP450/CAMSAP2/MMG/CDK5RAP2/p53 knockout cell line are shown below.

1768 (B) Diagram illustrating the binding sites of p53 antibodies and the position of the mutation induced  
1769 in p53-encoding gene.

1770 (C) Immunofluorescence images showing p53 staining in control and  
1771 AKAP450/CAMSAP2/MMG/CDK5RAP2/p53 knockout cells.

1772 (D) Diagram illustrating two sgRNA sites targeting pericentrin exon 5. The green and red boxes indicate  
1773 the position of the PAM sites, and the predicted Cas9 cut sites are indicated by scissors. Genotyping  
1774 results of the genomic mutation using gel-purified PCR product which covers exon 5 of the pericentrin-  
1775 encoding gene in AKAP450/CAMSAP2/MMG/CDK5RAP2/p53/pericentrin knockout cell line are shown  
1776 below.

1777 (E) Diagram illustrating the binding domain of the pericentrin antibody and the positions of the  
1778 mutations induced downstream of the Cas9 cut sites.



1779 (F) Immunofluorescence images showing the confirmation of pericentrin loss in control and  
1780 AKAP450/CAMSAP2/MMG/CDK5RAP2/p53/pericentrin knockout cells.

1781 (G) Western blot illustrating the p53 and pericentrin loss in control and  
1782 AKAP450/CAMSAP2/MMG/CDK5RAP2/p53/pericentrin knockout cells.

1783 (H) Immunofluorescence images of control and centrinone-treated AKAP450/CAMSAP2/  
1784 CDK5RAP2/MMG/p53/pericentrin knockout cells staining microtubules ( $\alpha$ -tubulin, red) and  
1785 centrosomes (CEP192, green). Zooms show magnification of the boxed area.

1786

1787 **Legends to Supplemental Videos**

1788 **Video 1. Cell cycle progression in acentriolar AKAP450/CAMSAP2/p53 knockout cells**

1789 Cell cycle progression visualized by phase-contrast imaging of centrinone-treated  
1790 AKAP450/CAMSAP2/p53 knockout RPE1 cells. The cells were imaged for ~15 hrs with 1min interval.  
1791 Time is hh:mm.

1792 **Video 2. caMTOC disassembly during nocodazole treatment of acentriolar AKAP450/CAMSAP2**  
1793 **knockout cells**

1794 PCM dynamics visualized by stable expression of GFP-CDK5RAP2 (green) in centrinone-treated  
1795 AKAP450/CAMSAP2 knockout RPE1 cells. Microtubules were labeled overnight with 100 nM SiR-  
1796 tubulin (red). The cell was imaged for ~3.5min (100 frames, 2 s interval) prior to the addition of 10  $\mu$ M  
1797 nocodazole. Time is min: sec.

1798 **Video 3. Depletion of pericentrin inhibits PCM clustering in acentriolar AKAP450/CAMSAP2**  
1799 **knockout cells**

1800 A pericentrin-depleted acentriolar AKAP450/CAMSAP2 knockout cell stably expressing GFP-CDK5RAP2  
1801 (green) and labeled overnight with 100 nM SiR-tubulin (red) was imaged for ~4.5 min (140 frames, 2 s  
1802 time interval) prior to treatment with 10  $\mu$ M nocodazole. Nocodazole was washed out at ~20 min  
1803 (frame 591), when all microtubules were depolymerized. Time is hr: min: sec.

1804 **Video 4. CAMSAP2 distribution and dynamics in acentriolar AKAP450 knockout cells**

1805 An acentriolar AKAP450 knockout RPE1 cell transiently expressing mCherry-CAMSAP2 was imaged for  
1806 15 hrs (900 frames, 1min interval). Time is hr:mm.

1807 **Video 5. PCM dynamics during nocodazole treatment and washout in acentriolar AKAP450 knockout**  
1808 **cells**

1809 An acentriolar AKAP450 knockout RPE1 cell stably expressing GFP-CDK5RAP2 (green) and labeled  
1810 overnight with 100 nM SiR-tubulin (red) was imaged for ~7min (200 frames, 2 s interval) prior to  
1811 treatment with 10  $\mu$ M nocodazole. Nocodazole was washed out at ~27 min (frame 801) when all  
1812 microtubules were depolymerized. Time is min: sec.

1813 **Video 6. PCM dynamics in acentriolar AKAP450 knockout cells are inhibited by dynapyrazole**

1814 An acentriolar AKAP450 knockout RPE1 cell stably expressing GFP-CDK5RAP2 (green) and labeled  
1815 overnight with 100 nM SiR-tubulin (red) was imaged for ~12 min (350 frames, 2 s interval) prior to the

1816 dynapyrazole treatment, treated with 5  $\mu$ M Dynapyrazole A for 1h, and then the same cell was imaged  
1817 for  $\sim$ 12 min. Time is min: sec.

1818 **Video 7. Depletion of pericentrin inhibits PCM clustering in acentriolar AKAP450 knockout cells**

1819 A pericentrin-depleted acentriolar AKAP450 knockout cell stably expressing GFP-CDK5RAP2 (green)  
1820 and labeled overnight with 100 nM SiR-tubulin (red) was imaged for  $\sim$ 3 min (90 frames, 2 s time  
1821 interval) prior to treatment with 10  $\mu$ M nocodazole. Nocodazole was washed out at  $\sim$ 23 min (frame  
1822 701) when all microtubules were depolymerized. Time is hr: min: sec.

1823 **Video 8. Inducible CAMSAP2-driven radial microtubule rearrangement in an**  
1824 **AKAP450/CAMSAP2/p53/pericentrin knockout cell**

1825 An acentriolar AKAP450/CAMSAP2/p53/pericentrin knockout cell transiently expressing 2FKBP-  
1826 mCherry-CAMSAP2 (red) and FRB-GFP-GCN4-ppKin14 (green) was imaged for 10 min (100 frames, 6 s  
1827 interval) prior to treatment with 100 nM rapalog. Subsequently, the cell was imaged for  $\sim$ 1 hr and 35  
1828 min after rapalog addition. Time is hr: min: sec.

1829 **Video 9. Cytosim simulations of PCM and microtubule self-organization**

1830 Example videos of our Cytosim simulations. Each simulation represents 1800 seconds of real time, and  
1831 the last frame is shown in the panels of Figure 8. In all simulations, we considered a circular cell with  
1832 a radius of 10  $\mu$ m (gray line), containing microtubules (red), PCM complexes (green), and CAMSAP-  
1833 kin14 complexes (blue). The videos correspond to panels A,B,C, D, I and J of Figure 8, as indicated.

1834

1835

1836 **Source data 1**

1837 **Uncropped Western blots shown in this manuscript**

1838 (A,B) Western blots showing that NEDD1 and CEP192 are present in centrinone-treated  
1839 AKAP450/CAMSAP2 knockout cells shown in Figure 2 – figure supplement 1A.

1840 (C-J) Western blots showing the depletion of indicated proteins in centrinone-treated  
1841 AKAP450/CAMSAP2 knockout cells shown in Figure 2 – figure supplement 1B.

1842 White dashed lines indicate where the blots were cut before incubation.

1843 (K) Western blot showing that 3 hrs treatment with dynaprazole A does not affect the expression of  
1844 the endogenous dynein heavy chain and the dynactin large subunit p150Glued in centrinone-treated  
1845 AKAP450/CAMSAP2 knockout cells shown in Figure 4D.

1846

1847 **Source data 2**

1848 **Uncropped Western blots shown in this manuscript**

1849 (A) Western blots showing the knockout of p53 from AKAP450/CAMSAP2 knockout cell line shown in  
1850 Figure 2 – figure supplement 2F.

1851 (B) Western blots showing the knockout of pericentrin from AKAP450/CAMSAP2/p53 knockout cell  
1852 line shown in Figure 2 – figure supplement 2K.

1853 (C-D) Western blots showing expression levels of CDK5RAP2,  $\gamma$ -tub, and ninein (NIN) in control (-CentB)  
1854 and centrinone-treated AKAP450/CAMSAP2/p53 knockout and AKAP450/CAMSAP2/p53/PCNT  
1855 knockout cell lines shown in Figure 2 – figure supplement 4B.

1856 (E) Western blots showing the knockout of AKAP450 and CAMSAP2 from EB1/EB3 mutant RPE1 cell  
1857 line shown in Figure 2 – figure supplement 5B.

1858 (F) Western blots showing the knockout of pericentrin in AKAP450/CAMSAP2/CDK5RAP2/MMG/p53/  
1859 knockout cell line shown in Figure 7 – figure supplement 3G.

1860 White dashed lines indicate where the blots were cut before incubation.

1861

1862 **Supplemental file 1. Cytosim configuration file for the simulations.**

1863 The configuration file was executed with a compiled Cytosim ([www.cytosim.org](http://www.cytosim.org)) version June 2019.

1864 **Supplemental Table S1: Parameters with numerical values used in the Cytosim simulations.**

|                           | Symbol             | Value                   | Note                                            | Reference                                |
|---------------------------|--------------------|-------------------------|-------------------------------------------------|------------------------------------------|
| <b>Cell</b>               |                    |                         |                                                 |                                          |
| Cell radius               |                    | 10 $\mu\text{m}$        |                                                 |                                          |
| Viscosity                 |                    | 1 pN s/ $\mu\text{m}^2$ | Typical value for Cytosim simulations           | (Kole et al., 2005; Letort et al., 2016) |
| Thermal energy            | kT                 | 4.2 pN nm               |                                                 |                                          |
| <b>Dynein</b>             |                    |                         |                                                 |                                          |
| Binding rate              | $k_{\text{on}}$    | 5 $\text{s}^{-1}$       | Typical order of magnitude                      | (Ohashi et al., 2019)                    |
| Force-free unbinding rate | $k_{\text{off}}^0$ | 0.1 $\text{s}^{-1}$     |                                                 | (Ohashi et al., 2019)                    |
| Detachment force          | $F_{\text{d}}$     | 2                       |                                                 | (Ohashi et al., 2019)                    |
| Binding range             |                    | 75 nm                   | Estimated                                       |                                          |
| Force-free velocity       | $v_0$              | 500 nm/s                |                                                 | (Brenner et al., 2020)                   |
| Stall force               | $F_{\text{s}}$     | 4 pN                    |                                                 | (Belyy et al., 2016)                     |
| <b>Kin14</b>              |                    |                         |                                                 |                                          |
| Binding rate              | $k_{\text{on}}$    | 1 $\text{s}^{-1}$       | Typical order of magnitude for molecular motors | (Klumpp et al., 2015)                    |
| Force-free unbinding rate | $k_{\text{off}}^0$ | 1 $\text{s}^{-1}$       | Assumption based on kinesin-1 value             | (Berger et al., 2019)                    |
| Detachment force          | $F_{\text{d}}$     | 3                       | Assumption based on kinesin-1 value             | (Pyrpassopoulos et al., 2020)            |
| Binding range             |                    | 75 nm                   | Estimated                                       |                                          |
| Force-free velocity       | $v_0$              | 800 nm/s                | Assumption based on kinesin-1 value             | (Carter and Cross, 2005)                 |
| Stall force               | $F_{\text{s}}$     | 7 pN                    | Assumption based on kinesin-1 value             | (Carter and Cross, 2005)                 |
| <b>Microtubules</b>       |                    |                         |                                                 |                                          |
| Rigidity                  |                    | 20 pN $\mu\text{m}^2$   |                                                 | (Gibeaux et al., 2017)                   |
| Catastrophe rate          | $k_{\text{cat}}$   | 0.026 $\text{s}^{-1}$   | A similar value has been used in the reference  | (Gibeaux et al., 2017)                   |
| Rescue rate               |                    | 0                       | We ignore rescues                               |                                          |
| Growing force             |                    | 1.7 pN                  |                                                 | (Dogterom and Yurke, 1997)               |

|                                               |       |                       |                                    |                                             |
|-----------------------------------------------|-------|-----------------------|------------------------------------|---------------------------------------------|
| Growing speed                                 | $v_g$ | 0.13 $\mu\text{m/s}$  |                                    | (Burakov et al., 2003; Letort et al., 2016) |
| Shrinkage speed                               |       | 0.272 $\mu\text{m/s}$ |                                    | (Burakov et al., 2003; Letort et al., 2016) |
| Maximum length                                |       | 7.5 $\mu\text{m}$     | To avoid boundary effects          |                                             |
|                                               |       |                       |                                    |                                             |
| <b>Adhesive interactions of PCM complexes</b> |       |                       |                                    |                                             |
| Binding rate                                  |       | 10 $\text{s}^{-1}$    | Estimated                          |                                             |
| Binding range                                 |       | 100 nm                | Estimated                          |                                             |
| Unbinding rate                                |       | 0.01 $\text{s}^{-1}$  | Estimated                          |                                             |
| Detachment force                              |       | 3 pN                  | Typical value, estimated           |                                             |
|                                               |       |                       |                                    |                                             |
| <b>General parameters</b>                     |       |                       |                                    |                                             |
| Stiffness of all linking elements             |       | 100 pN/ $\mu\text{m}$ | Typical value for molecular motors | (Gros et al., 2021; Letort et al., 2016)    |

1865

1866

1867 **Key reagent or resource table**

| Reagent type (species) or resource | Designation                          | Source or reference      | Identifiers                                               | Additional information          |
|------------------------------------|--------------------------------------|--------------------------|-----------------------------------------------------------|---------------------------------|
| Antibody                           | anti-Pericentrin (mouse monoclonal)  | Abcam                    | Abcam Cat# ab28144, RRID:AB_2160664                       | (1:500) for IF                  |
| Antibody                           | anti-Pericentrin (rabbit polyclonal) | Abcam                    | Abcam Cat# ab4448, RRID:AB_304461                         | (1:500) for IF; (1:1000) for WB |
| Antibody                           | anti-CDK5RAP2 (rabbit polyclonal)    | Bethyl Laboratories      | Bethyl Cat# A300-554A, RRID:AB_477974                     | (1:300) for IF; (1:1000) for WB |
| Antibody                           | anti-γ-tubulin (mouse monoclonal)    | Sigma-Aldrich            | Sigma-Aldrich: T6557, RRID:AB_477584                      | (1:300) for IF; (1:2000) for WB |
| Antibody                           | anti-γ-tubulin (rabbit polyclonal)   | Sigma-Aldrich            | Sigma-Aldrich:T3559, RRID:AB_477575                       | (1:300) for IF                  |
| Antibody                           | anti-NEDD1 (mouse monoclonal)        | Abnova                   | Abnova Corporation Cat# H00121441-M05, RRID:AB_534956     | (1:300) for IF                  |
| Antibody                           | anti-NEDD1 (rabbit polyclonal)       | Rockland                 | Rockland Cat# 109-401-C38S, RRID:AB_10893219              | (1:1000) for WB                 |
| Antibody                           | anti-Ninein (rabbit polyclonal)      | BETHYL                   | Bethyl Cat# A301-504A, RRID:AB_999627                     | (1:300) for IF; (1:2000) for WB |
| Antibody                           | anti-Ninein (mouse monoclonal)       | Santa Cruz Biotechnology | Santa Cruz Biotechnology Cat# sc-376420, RRID:AB_11151570 | (1:300) for IF                  |
| Antibody                           | anti-Dynein HC (rabbit polyclonal)   | Santa Cruz Biotechnology | Santa Cruz Biotechnology Cat# sc-9115, RRID:AB_2093483    | (1:300) for IF; (1:500) for WB  |
| Antibody                           | anti-p150Glued (mouse monoclonal)    | BD Biosciences           | BD Biosciences Cat# 610473, RRID:AB_397845                | (1:100) for IF; (1:500) for WB  |
| Antibody                           | anti-PCM1 (mouse monoclonal)         | Santa Cruz Biotechnology | Santa Cruz Biotechnology Cat# sc-398365, RRID:AB_2827155  | (1:300) for IF                  |
| Antibody                           | anti-PCM1 (rabbit polyclonal)        | Bethyl Laboratories      | Bethyl Cat# A301-150A, RRID:AB_873100                     | (1:300) for IF                  |
| Antibody                           | anti-AKAP450 (mouse monoclonal)      | BD Biosciences           | BD Biosciences Cat# 611518, RRID:AB_398978                | (1:500) for WB                  |
| Antibody                           | anti-CAMSAP2 (rabbit polyclonal)     | Novus                    | Novus:NBP1-21402; RRID:AB_1659977                         | (1:200) for IF; (1:1000) for WB |
| Antibody                           | anti-p53 (mouse monoclonal)          | Santa Cruz Biotechnology | Santa Cruz Biotechnology Cat# sc-126, RRID:AB_628082      | (1:300) for IF; (1:1000) for WB |
| Antibody                           | anti-p53 (rabbit polyclonal)         | BETHYL                   | Bethyl Cat# A300-248A, RRID:AB_263349                     | (1:300) for IF                  |
| Antibody                           | anti-EB1 (mouse monoclonal)          | BD Biosciences           | BD Biosciences:610535; RRID:AB_397892                     | (1:400) for IF                  |

|          |                                                      |                          |                                                          |                                    |
|----------|------------------------------------------------------|--------------------------|----------------------------------------------------------|------------------------------------|
| Antibody | anti-EB3 (rabbit polyclonal)                         | Martin, et al., 2018;    |                                                          | (1:300) for IF                     |
| Antibody | anti-Centrin (mouse monoclonal)                      | Millipore                | Millipore Cat# 04-1624, RRID:AB_10563501                 | (1:500) for IF                     |
| Antibody | anti-CEP120 (rabbit polyclonal)                      | Thermo Fisher Scientific | Thermo Fisher Scientific Cat# PA5-55985, RRID:AB_2639665 | (1:300) for IF                     |
| Antibody | anti-CEP135 (rabbit polyclonal)                      | Sigma-Aldrich            | Sigma-Aldrich:SAB4503685; RRID:AB_10746232               | (1:300) for IF                     |
| Antibody | anti-CEP152 (rabbit polyclonal)                      | Abcam                    | Abcam, Cat # ab183911                                    | (1:300) for IF;<br>(1:1000) for WB |
| Antibody | anti-CEP170 (mouse monoclonal)                       | Thermo Fisher Scientific | Thermo Fisher Scientific Cat# 41-3200, RRID:AB_2533502   | (1:200) for IF                     |
| Antibody | anti-CEP192 (rabbit polyclonal)                      | Bethyl Laboratories      | Bethyl Cat# A302-324A, RRID:AB_1850234                   | (1:300) for IF;<br>(1:1000) for WB |
| Antibody | anti-GM130 (mouse monoclonal)                        | BD Biosciences           | BD Biosciences:610823; RRID:AB_398142                    | (1:300) for IF;<br>(1:2000) for WB |
| Antibody | anti- $\alpha$ -tubulin YL1/2 (rat monoclonal)       | Pierce                   | Pierce: MA1-80017; RRID:AB_2210201                       | (1:300) for IF                     |
| Antibody | anti- $\alpha$ -tubulin (mouse monoclonal)           | Sigma-Aldrich            | Sigma-Aldrich:T5168; RRID:AB_477579                      | (1:400) for IF                     |
| Antibody | anti- $\alpha$ -tubulin (rabbit monoclonal antibody) | Abcam                    | Abcam Cat# ab52866, RRID:AB_869989                       | (1:800) for IF                     |
| Antibody | Anti- $\beta$ -tubulin (mouse monoclonal)            | Sigma-Aldrich            | Sigma-Aldrich Cat# T8660, RRID:AB_477590                 | (1:2000) for WB                    |
| Antibody | anti-CLASP1 (rabbit polyclonal)                      | (Akhmanova et al., 2001) |                                                          | (1:400) for IF                     |
| Antibody | anti-CLASP2 (rabbit polyclonal)                      | (Akhmanova et al., 2001) |                                                          | (1:400) for IF                     |
| Antibody | anti-CLIP-115 #2238 (rabbit polyclonal)              | (Akhmanova et al., 2001) |                                                          | (1:300) for IF                     |
| Antibody | anti-CLIP-170 #2360 (rabbit polyclonal)              | (Akhmanova et al., 2001) |                                                          | (1:300) for IF                     |
| Antibody | anti-ch-TOG (rabbit polyclonal)                      | (Charrasse et al., 1998) | Dr. Lynne Cassimeris (Lehigh University, USA)            | (1:200) for IF                     |
| Antibody | anti-CPAP (rabbit polyclonal)                        | (Kohlmaier et al., 2009) | Dr. Pierre Gönczy (EPFL, Switzerland)                    | (1:200) for IF                     |
| Antibody | anti-CP110 (rabbit monoclonal)                       | Proteintech              | Proteintech Cat# 12780-1-AP, RRID:AB_10638480            | (1:300) for IF                     |
| Antibody | anti-KIF1C (rabbit polyclonal)                       | Cytoskeleton             | Cytoskeleton Cat# AKIN11-A, RRID:AB_10708792             | (1:300) for IF                     |



|                        |                                              |                                            |                                                                                                                                                                                                                                                                                             |                 |
|------------------------|----------------------------------------------|--------------------------------------------|---------------------------------------------------------------------------------------------------------------------------------------------------------------------------------------------------------------------------------------------------------------------------------------------|-----------------|
| Antibody               | anti-KIF2A (rabbit polyclonal)               | (Ganem and Compton, 2004)                  | Dr. Duane Compton (Geisel School of Medicine at Dartmouth, USA)                                                                                                                                                                                                                             | (1:300) for IF  |
| Antibody               | anti-HAUS2 (rabbit polyclonal)               | (Lawo et al., 2009)                        | Dr. Laurence Pelletier (Lunenfeld-Tanenbaum Research Institute, Canada)                                                                                                                                                                                                                     | (1:200) for IF  |
| Antibody               | anti-BICD2 (rabbit polyclonal)               | (Hoogenraad et al., 2003)                  |                                                                                                                                                                                                                                                                                             | (1:2500) for WB |
| Antibody               | anti-Actin (mouse monoclonal)                | Millipore                                  | Millipore Cat# MAB1501, RRID:AB_2223041                                                                                                                                                                                                                                                     | (1:4000) for WB |
| Antibody               | anti-Ku80 (mouse monoclonal)                 | BD Biosciences                             | BD Biosciences Cat# 611360, RRID:AB_398882                                                                                                                                                                                                                                                  | (1:2000) for WB |
| Antibody               | anti-LaminA/C (mouse monoclonal)             | BD Biosciences                             | BD Biosciences Cat# 612162, RRID:AB_399533                                                                                                                                                                                                                                                  | (1:400) for IF  |
| Antibody               | anti-Cytochrome C (mouse monoclonal)         | BD Biosciences                             | BD Biosciences Cat# 556432, RRID:AB_396416                                                                                                                                                                                                                                                  | (1:300) for IF  |
| Antibody               | anti-Calnexin (rabbit polyclonal)            | Abcam                                      | Abcam Cat# ab22595, RRID:AB_2069006                                                                                                                                                                                                                                                         | (1:300) for IF  |
| Antibody               | Anti-Lamtor4 (rabbit monoclonal)             | Cell Signaling (CST)/Bioke                 | Cell Signaling Technology Cat# 12284, RRID:AB_2797870                                                                                                                                                                                                                                       | (1:800) for IF  |
|                        | Anti-Tom20 (mouse monoclonal)                | BD Biosciences                             | BD Biosciences Cat# 612278, RRID:AB_399595                                                                                                                                                                                                                                                  | (1:200) for IF  |
| Antibody               | IRDye 800CW/680LT secondaries                | Li-Cor Biosciences                         | LI-COR Biosciences Cat# 926-32219, RRID:AB_1850025'<br>LI-COR Biosciences Cat# 926-68020, RRID:AB_10706161;<br>LI-COR Biosciences Cat# 926-32211, RRID:AB_621843;<br>LI-COR Biosciences Cat# 926-68021, RRID:AB_10706309                                                                    | (1:5000) for WB |
| Antibody               | Alexa Fluor 405-, 488-, and 594- secondaries | Molecular Probes/ Thermo Fisher Scientific | Molecular Probes Cat# A-11007, RRID:AB_141374; Cat# A-11034, RRID:AB_2576217; Cat# A32723, RRID:AB_2633275; Cat# A-31553, RRID:AB_221604; Cat# A-11029, RRID:AB_138404; Cat# A-11032, RRID:AB_2534091; Cat# A-11006, RRID:AB_141373; Thermo Fisher Scientific Cat# A-11012, RRID:AB_2534079 | (1:500) for IF  |
| Sequence-based reagent | siRNA against PCNT #1                        | (Gavilan et al., 2018)                     | 5'-AAAAGCUCUGAUUUUAUCAAAG-3'                                                                                                                                                                                                                                                                |                 |

|                        |                                    |                                                        |                                 |  |
|------------------------|------------------------------------|--------------------------------------------------------|---------------------------------|--|
| Sequence-based reagent | siRNA against PCNT #2              | (Gavilan et al., 2018)                                 | 5'-UGAUUGGACGUCAUCCAAUGAGAAA-3' |  |
| Sequence-based reagent | siRNA against PCNT #3              | (Tibelius et al., 2009)                                | 5'-GCAGCUGAGCUGAAGGAGA-3'       |  |
| Sequence-based reagent | siRNA against CDK5RAP2             | (Fong et al., 2008)                                    | 5'-UGGAAGAUCUCCUAACUAA-3'       |  |
| Sequence-based reagent | siRNA against $\gamma$ -tubulin #1 | (Luders et al., 2006)                                  | 5'-GGAGGACAUGUUCAAGGAA-3'       |  |
| Sequence-based reagent | siRNA against $\gamma$ -tubulin #2 | (Vinopal et al., 2012)                                 | 5'-CGCAUCUCUUUCUCAUUAU-3'       |  |
| Sequence-based reagent | siRNA against Ninein               | (Goldspink et al., 2017)                               | 5'-CGGUACAAUGAGUGUAGAAU-3'      |  |
| Sequence-based reagent | siRNA against PCM1                 | (Wang et al., 2013)                                    | 5'-UCAGCUUCGUGAUUCUCAG-3'       |  |
| Sequence-based reagent | siRNA against CEP152               | (Cizmecioglu et al., 2010; Komarova et al., 2005)      | 5'-GCGGAUCCAACUGGAAAUCUA-3'     |  |
| Sequence-based reagent | siRNA against CEP120               | (Ganem et al., 2005; Lin et al., 2013)                 | 5'-AAUAUAUCUUCUUGCAUCUCCU-3'    |  |
| Sequence-based reagent | siRNA against CEP192               | (Sonnen et al., 2013)                                  | 5'-CAGAGGAAUCAAAUAAUAAA-3'      |  |
| Sequence-based reagent | siRNA against NEDD1 #1             | (Luders et al., 2006)                                  | 5'-GCAGACAUGUGUCAAUUUA-3'       |  |
| Sequence-based reagent | siRNA against NEDD1 #2             | (Haren et al., 2006)                                   | 5'-GGGCAAAAGCAGACAUGUG-3'       |  |
| Sequence-based reagent | siRNA against DHC #1               | (Splinter et al., 2010)                                | 5'-CGUACUCCCGUGAUUGAUG-3'       |  |
| Sequence-based reagent | siRNA against DHC #2               | (Splinter et al., 2010)                                | 5'-GCCAAAAGUUACAGACUUU-3'       |  |
| Sequence-based reagent | siRNA against CAMSAP2              | (Jiang et al., 2014)                                   | 5'-GUACUGGAUAAAUAAGGUA-3'       |  |
| Sequence-based reagent | siRNA against CEP170               | (Stolz et al., 2015)                                   | 5'-GAAGGAAUCCUCCAAGUCA-3'       |  |
| Sequence-based reagent | siRNA against CPAP                 | (Tang et al., 2009)                                    | 5'-AGAAUUAGCUCGAAUAGAA-3'       |  |
| Sequence-based reagent | siRNA against CLIP170 #1           | (Lansbergen et al., 2004; Mimori-Kiyosue et al., 2005) | 5'-GGAGAAGCAGCAGCACAUU-3'       |  |

|                        |                           |                                                          |                              |  |
|------------------------|---------------------------|----------------------------------------------------------|------------------------------|--|
| Sequence-based reagent | siRNA against CLIP170 #2  | (Lansbergen et al., 2004; Mimori-Kiyosue et al., 2005)   | 5'-UGAAGAUGUCAGGAGAUAA-3'    |  |
| Sequence-based reagent | siRNA against CLIP115 #1  | (Lansbergen et al., 2004)                                | 5'-GGCACAGCAUGAGCAGUAU-3'    |  |
| Sequence-based reagent | siRNA against CLIP115 #2  | (Lansbergen et al., 2004)                                | 5'-CUGGAAAUCCAAGCUGGAC-3'    |  |
| Sequence-based reagent | siRNA against ch-TOG:     | (Cassimeris and Morabito, 2004; Lansbergen et al., 2004) | 5'-GAGCCCAGAGUGGUCCAAA-3'    |  |
| Sequence-based reagent | siRNA against EB1         | (Grigoriev et al., 2008; Lansbergen et al., 2004)        | 5'-AUUCCAAGCUAAGCUAGAA-3'    |  |
| Sequence-based reagent | siRNA against EB3         | (Cassimeris and Morabito, 2004; Komarova et al., 2005)   | 5'-CUAUGAUGGAAAGGAUUAC-3'    |  |
| Sequence-based reagent | siRNA against KIF2A       | (Ganem et al., 2005; Grigoriev et al., 2008)             | 5'-GGCAAAGAGAUUGACCUGG-3'    |  |
| Sequence-based reagent | siRNA against CP110       | (Cizmecioglu et al., 2010; Spektor et al., 2007)         | 5'-AAGCAGCAUGAGUAUGCCAGU-3'  |  |
| Sequence-based reagent | siRNA against Luciferase  | (Lansbergen et al., 2004; Lin et al., 2013)              | 5'-CGUACGCGGAAUACUUCGA-3'    |  |
| Sequence-based reagent | sgRNA target CAMSAP2      | (Lansbergen et al., 2004; Wu et al., 2016)               | 5'-gCATGATCGATACCCTCATGA-3   |  |
| Sequence-based reagent | sgRNA target p53 e2 #1    | This study                                               | 5'-gCGTCGAGCCCCCTCTGAGTC-3'; |  |
| Sequence-based reagent | sgRNA target p53 e4 #2    | This study                                               | 5'-gCCATTGTTCAATATCGTCCG-3'; |  |
| Sequence-based reagent | sgRNA target PCNT e5-1 #1 | This study                                               | 5'-gAGACGGCATTGACGGAGCTG-3'; |  |

|                         |                                        |                                                                                                   |                                                                                                                                                 |                                          |
|-------------------------|----------------------------------------|---------------------------------------------------------------------------------------------------|-------------------------------------------------------------------------------------------------------------------------------------------------|------------------------------------------|
| Sequence-based reagent  | sgRNA target PCNT e5-2 #2              | This study                                                                                        | 5'-GCTCAACAGCCGGCGTGCCC-3';                                                                                                                     |                                          |
| Sequence-based reagent  | p53 KO sequencing primer F             | This study                                                                                        | 5'-TCAGACACTGGCATGGTGT-3';                                                                                                                      |                                          |
| Sequence-based reagent  | p53 KO sequencing primer R             | This study                                                                                        | 5'-AGAAATGCAGGGGGATACGG-3';                                                                                                                     |                                          |
| Sequence-based reagent  | PCNT KO sequencing primer F            | This study                                                                                        | 5'-ATACAGCGAGGGAATTCGGG-3';                                                                                                                     |                                          |
| Sequence-based reagent  | PCNT KO sequencing primer R            | This study                                                                                        | 5'-TAGAATGCCACACCGAGC-3';                                                                                                                       |                                          |
| Chemical compound       | Centrinone B                           | Tocris Bioscience                                                                                 | Tocris Bioscience Cat # 5690                                                                                                                    | 125 nM                                   |
| Chemical compound       | Nocodazole                             | Sigma-Aldrich                                                                                     | Sigma-Aldrich, Cat # M1404-10MG                                                                                                                 | 10 $\mu$ M                               |
| Chemical compound       | Rapalog (A/C Heterodimerizer)          | Takara                                                                                            | Takara, Cat # 635056                                                                                                                            | 50 nM (fixation), 100 nM (live imaging). |
| Chemical compound       | Dynapyrazole A                         | Sigma-Aldrich                                                                                     | Sigma-Aldrich, Cat # SML2127-25MG                                                                                                               | 5 $\mu$ M                                |
| Chemical compound       | BI2536                                 | Selleckchem                                                                                       | Selleckchem, Cat # S1109                                                                                                                        | 500 nM                                   |
| Chemical compound       | Thymidine                              | Sigma-Aldrich                                                                                     | Sigma-Aldrich, Cat # T9250-25G                                                                                                                  | 5 mM                                     |
| Chemical compound       | proTAME                                | Boston Biochem                                                                                    | Boston Biochem, Cat # I-440                                                                                                                     | 5 $\mu$ M                                |
| Chemical compound       | Brefeldin A                            | Peptrotech                                                                                        | Peptrotech, Cat # 2031560                                                                                                                       | 5 $\mu$ g/ml                             |
| Chemical compound       | SiR-tubulin                            | Tebu-bio                                                                                          | Tebu-bio, Cat # SC002                                                                                                                           | 100 nM                                   |
| Software, algorithm     | ImageJ radially plugin                 | <a href="https://github.com/ekatruxha/radialitymap">https://github.com/ekatruxha/radialitymap</a> | Katruxha, 2017. radialitymap. Github. <a href="https://github.com/ekatruxha/radialitymap">https://github.com/ekatruxha/radialitymap</a> cf1e78f |                                          |
| Recombinant DNA reagent | pLVX-IRES-puro (plasmid)               | Clontech                                                                                          |                                                                                                                                                 |                                          |
| Recombinant DNA reagent | pB80-FRB-TagBFP-GCN4-ppKin14 (plasmid) | This work                                                                                         |                                                                                                                                                 |                                          |

|                          |                                                                    |                   |          |  |
|--------------------------|--------------------------------------------------------------------|-------------------|----------|--|
| Recombinant DNA reagent  | pB80-FRB-GFP-GCN4-ppKin14 (plasmid)                                | This work         |          |  |
| Recombinant DNA reagent  | pB80-FRB-HA-GCN4-ppKin14 (plasmid)                                 | This work         |          |  |
| Recombinant DNA reagent  | 2FKBP-mCherry-CAMSAP2 (plasmid)                                    | This work         |          |  |
| Recombinant DNA reagent  | GFP-PCNT (plasmid)                                                 | This work         |          |  |
| Recombinant DNA reagent  | GST-DmKHC(1-421)-mNeonGreen (plasmid)                              | This work         |          |  |
| Cell line (Homo sapiens) | hTERT-RPE-1                                                        | ATCC              | CRL-4000 |  |
| Cell line (Homo sapiens) | hTERT-RPE-1 AKAP450 knockout                                       | (Wu et al., 2016) |          |  |
| Cell line (Homo sapiens) | hTERT-RPE-1 AKAP450/CAMSAP 2 knockout                              | (Wu et al., 2016) |          |  |
| Cell line (Homo sapiens) | hTERT-RPE-1 AKAP450/CAMSAP 2/p53 knockout                          | This work         |          |  |
| Cell line (Homo sapiens) | hTERT-RPE-1 AKAP450/CAMSAP 2/p53/Pericentrin knockout              | This work         |          |  |
| Cell line (Homo sapiens) | hTERT-RPE-1 AKAP450/CAMSAP 2/EB1/EB3 mutant                        | This work         |          |  |
| Cell line (Homo sapiens) | hTERT-RPE-1 AKAP450/CAMSAP 2/CDK5RAP2/MMG/p53/Pericentrin knockout | This work         |          |  |

|                             |          |      |           |  |
|-----------------------------|----------|------|-----------|--|
| Cell line<br>(Homo sapiens) | HEK 293T | ATCC | CRL-11268 |  |
|-----------------------------|----------|------|-----------|--|

1868

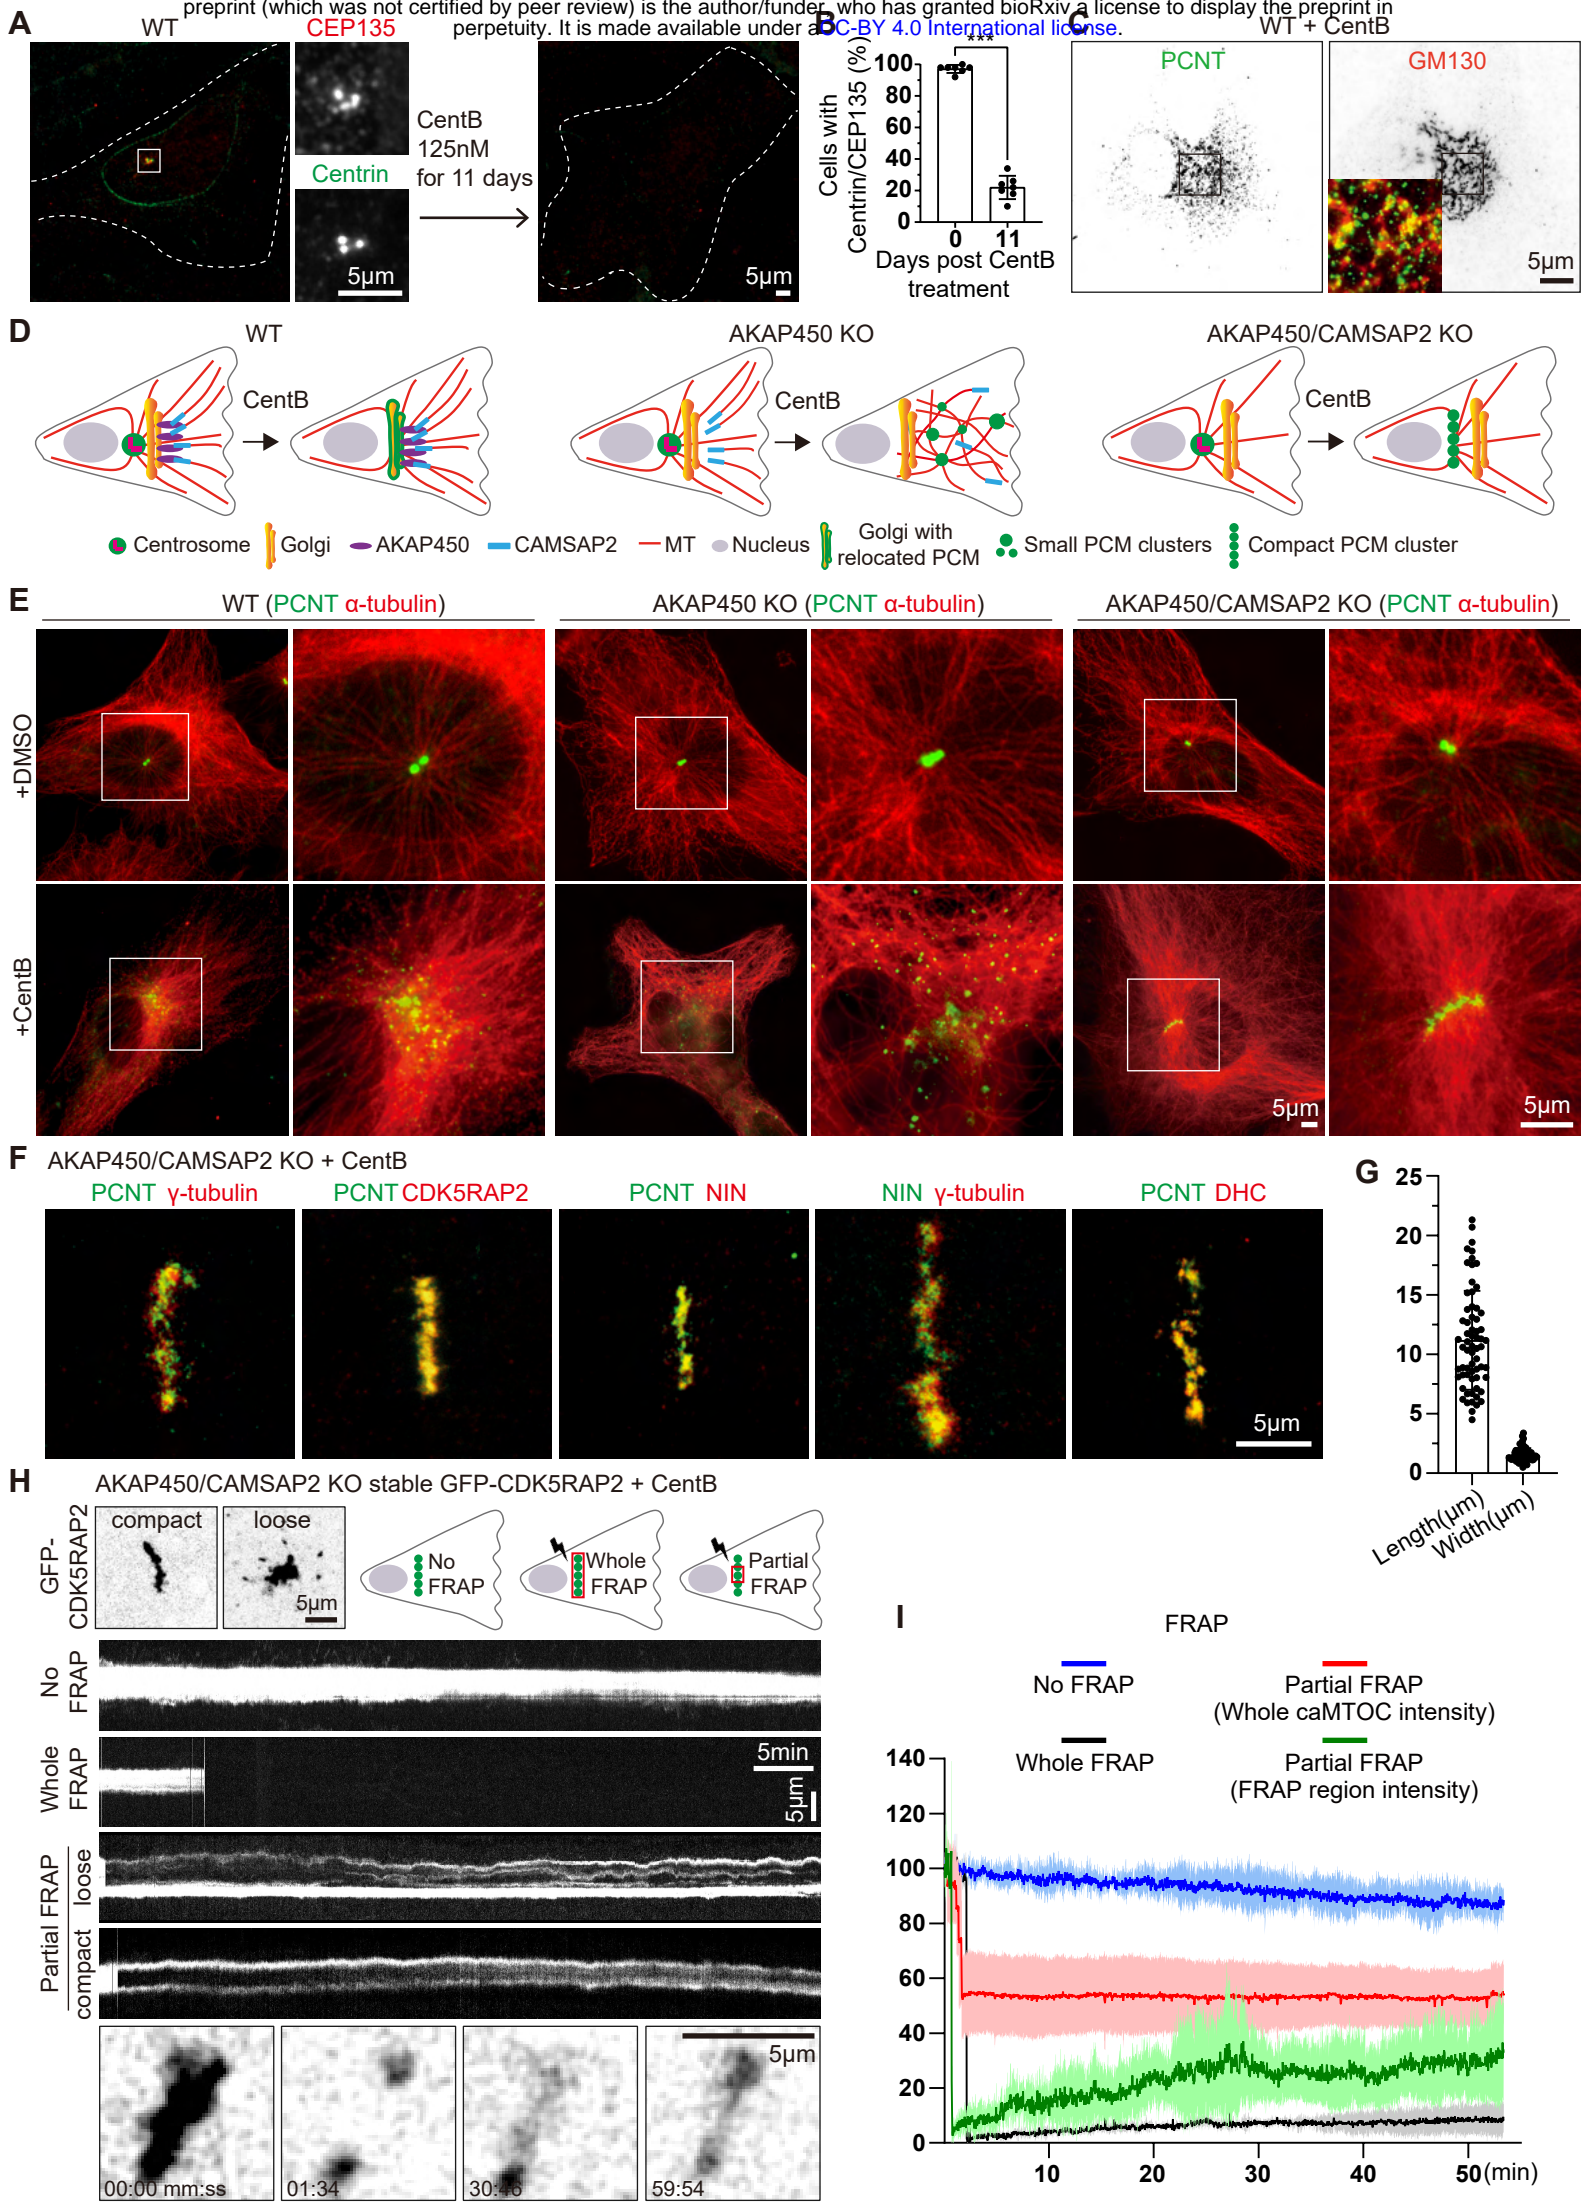

## Figure 2

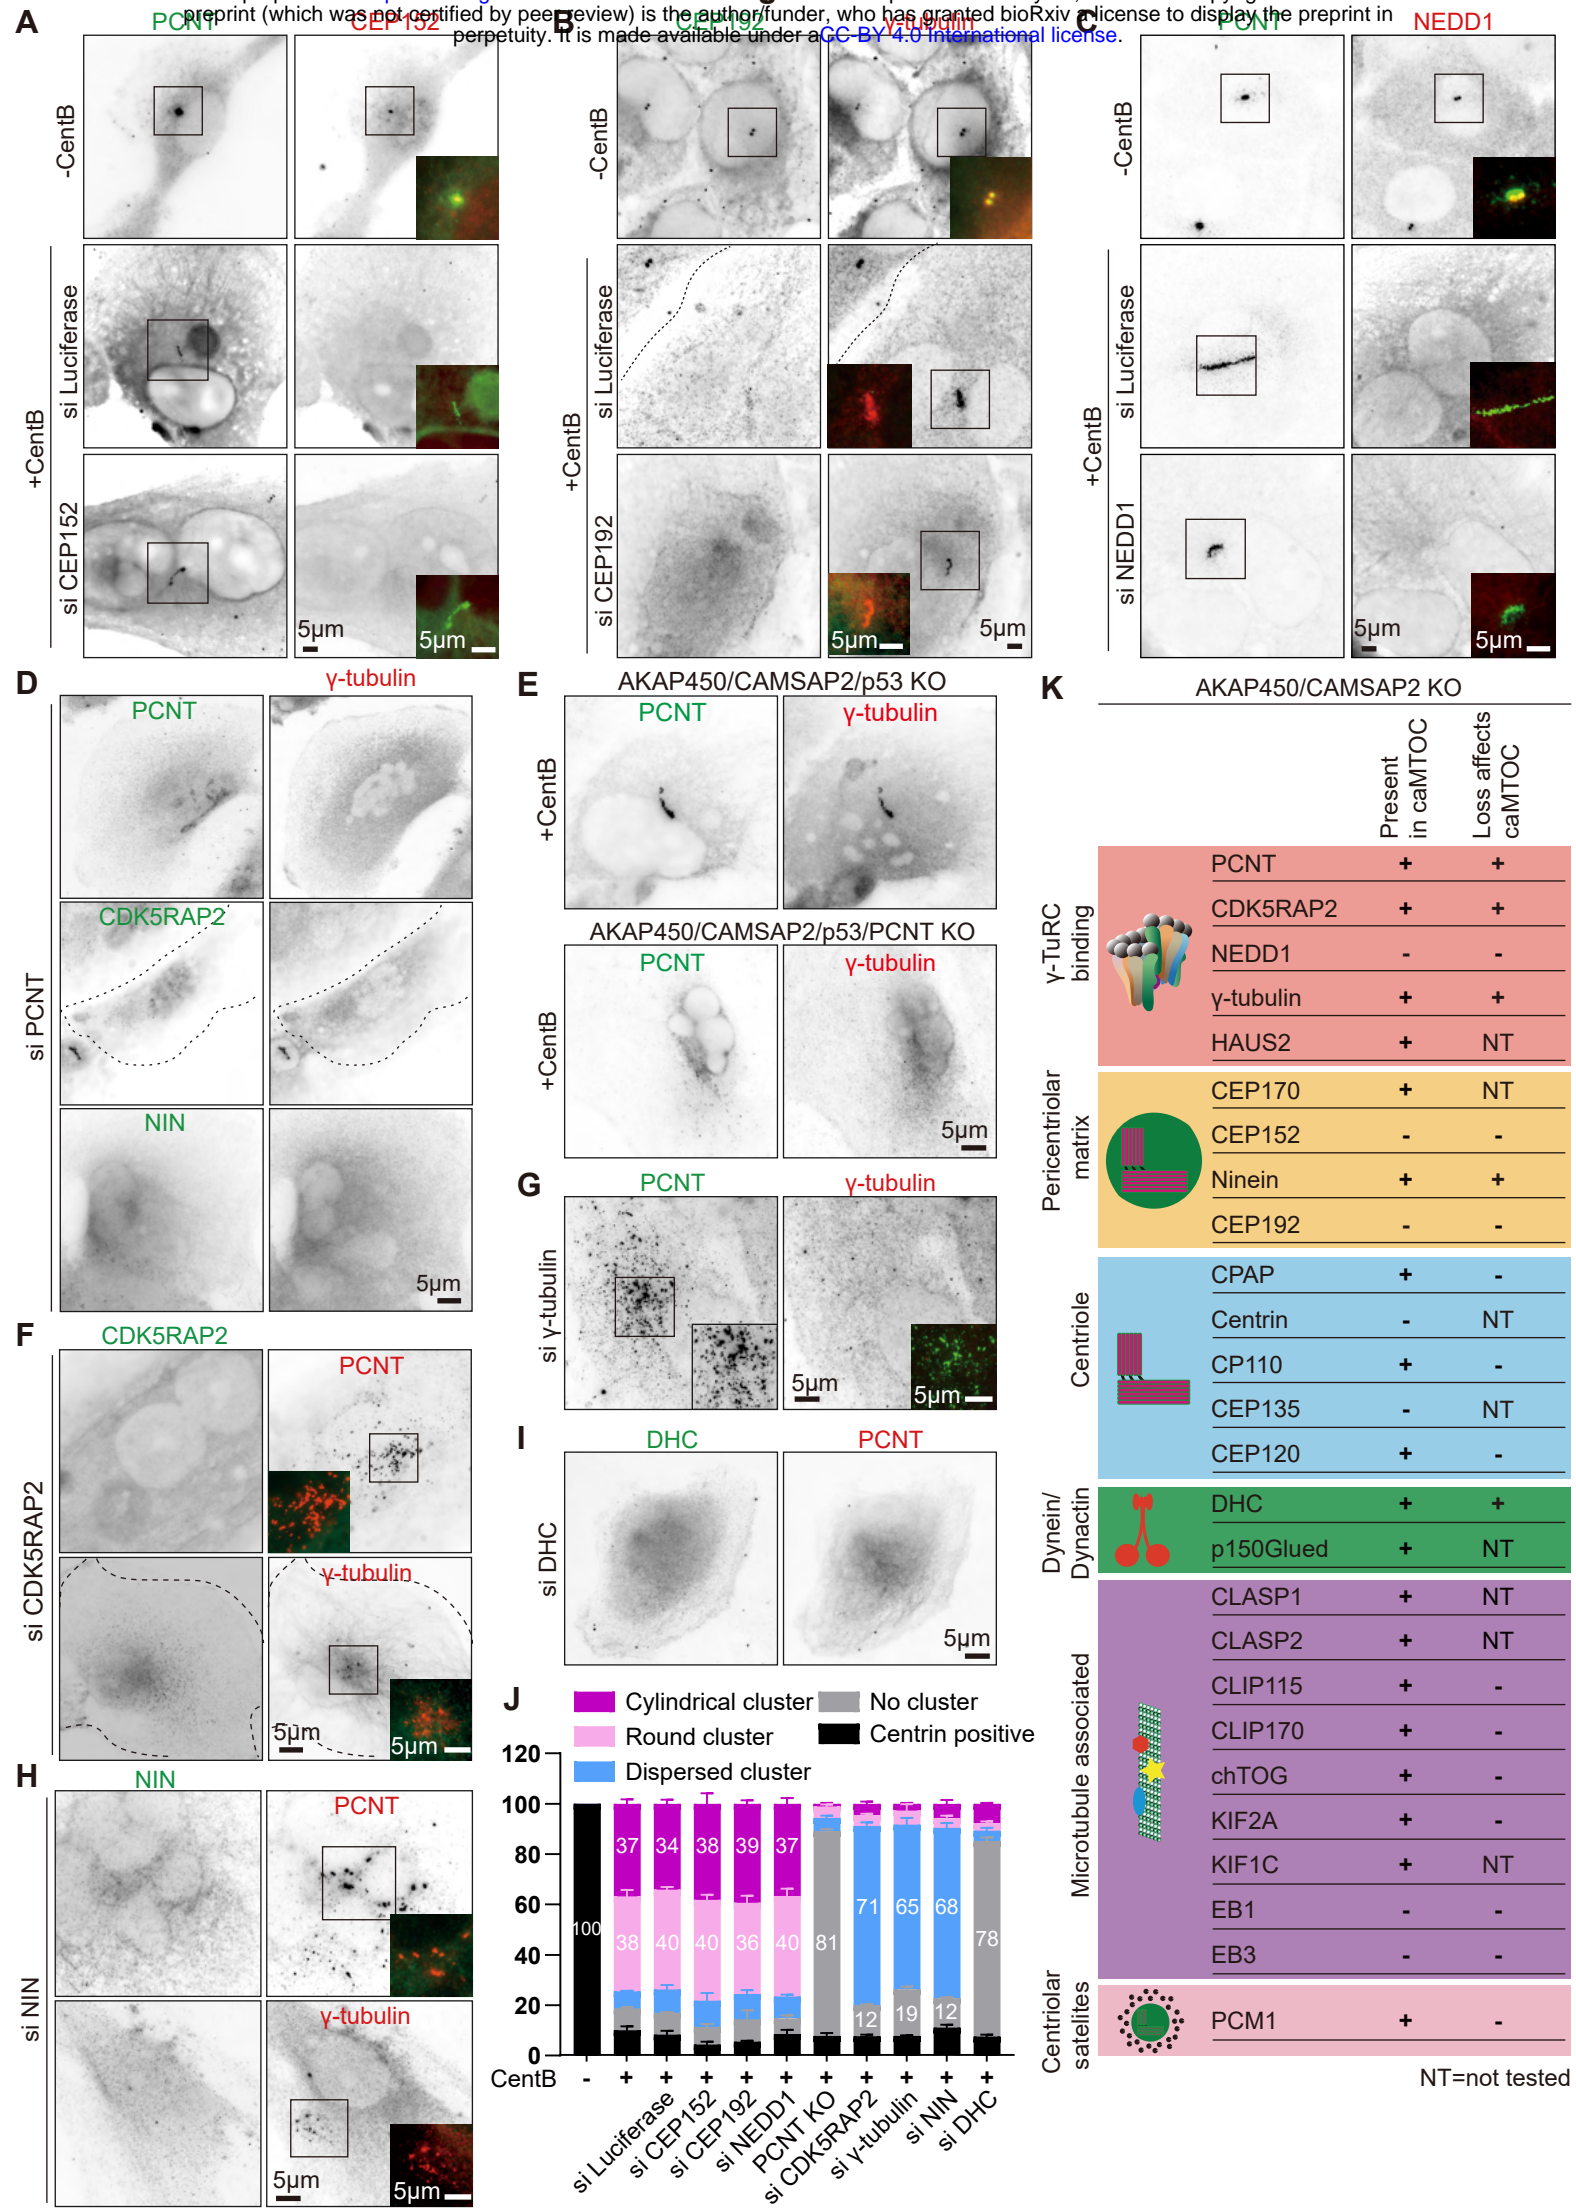



Figure 3

**A** AKAP450/CAMSAP2 KO + CentB

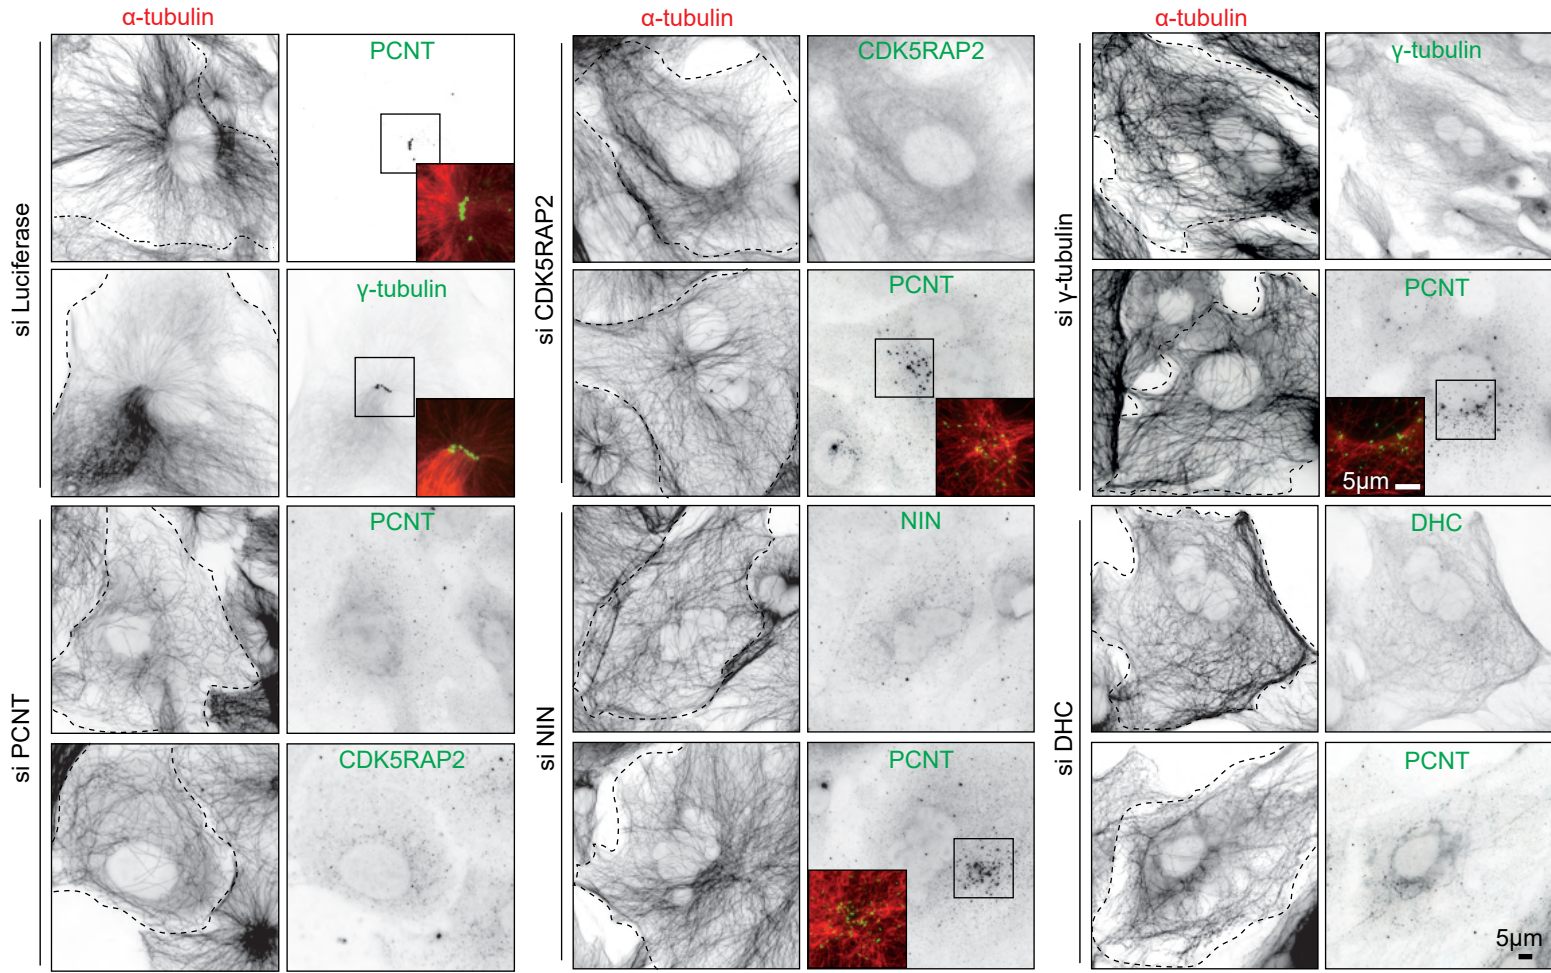

**B** Normalized microtubule intensity (%)

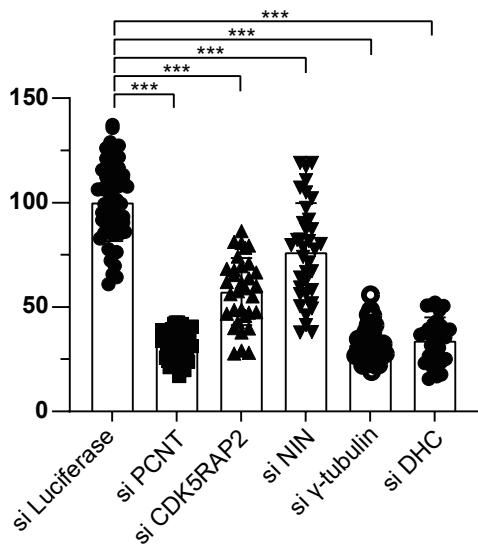

**C** AKAP450/CAMSAP2 KO + CentB

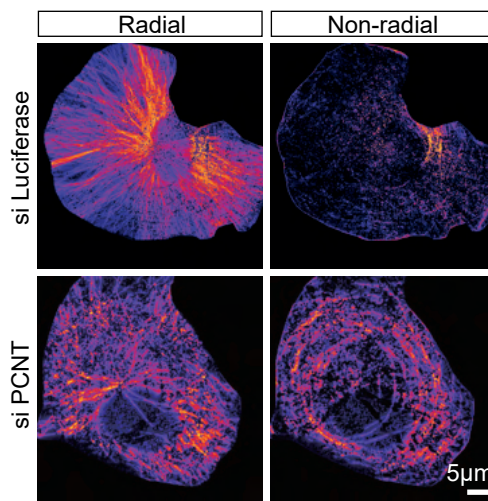

**D** Microtubule network non-radial part (%)

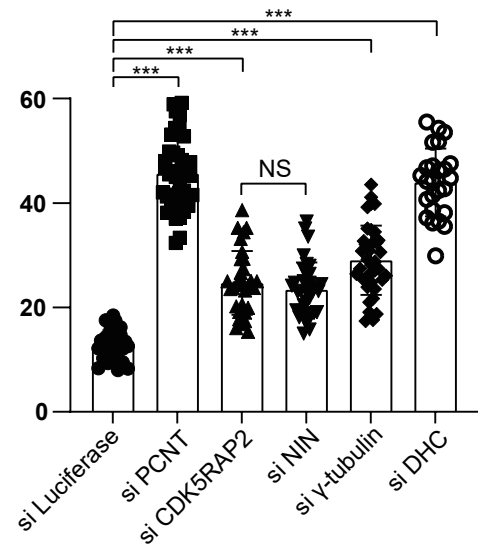

**E** AKAP450/CAMSAP2 KO + CentB

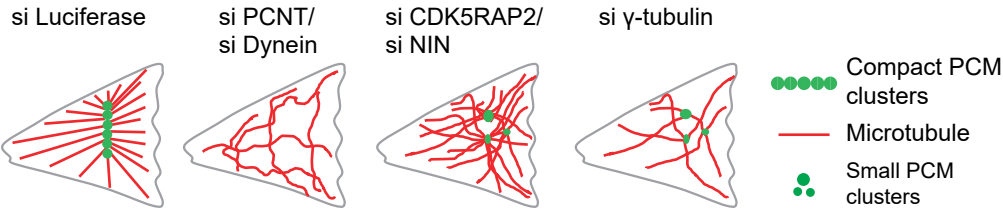

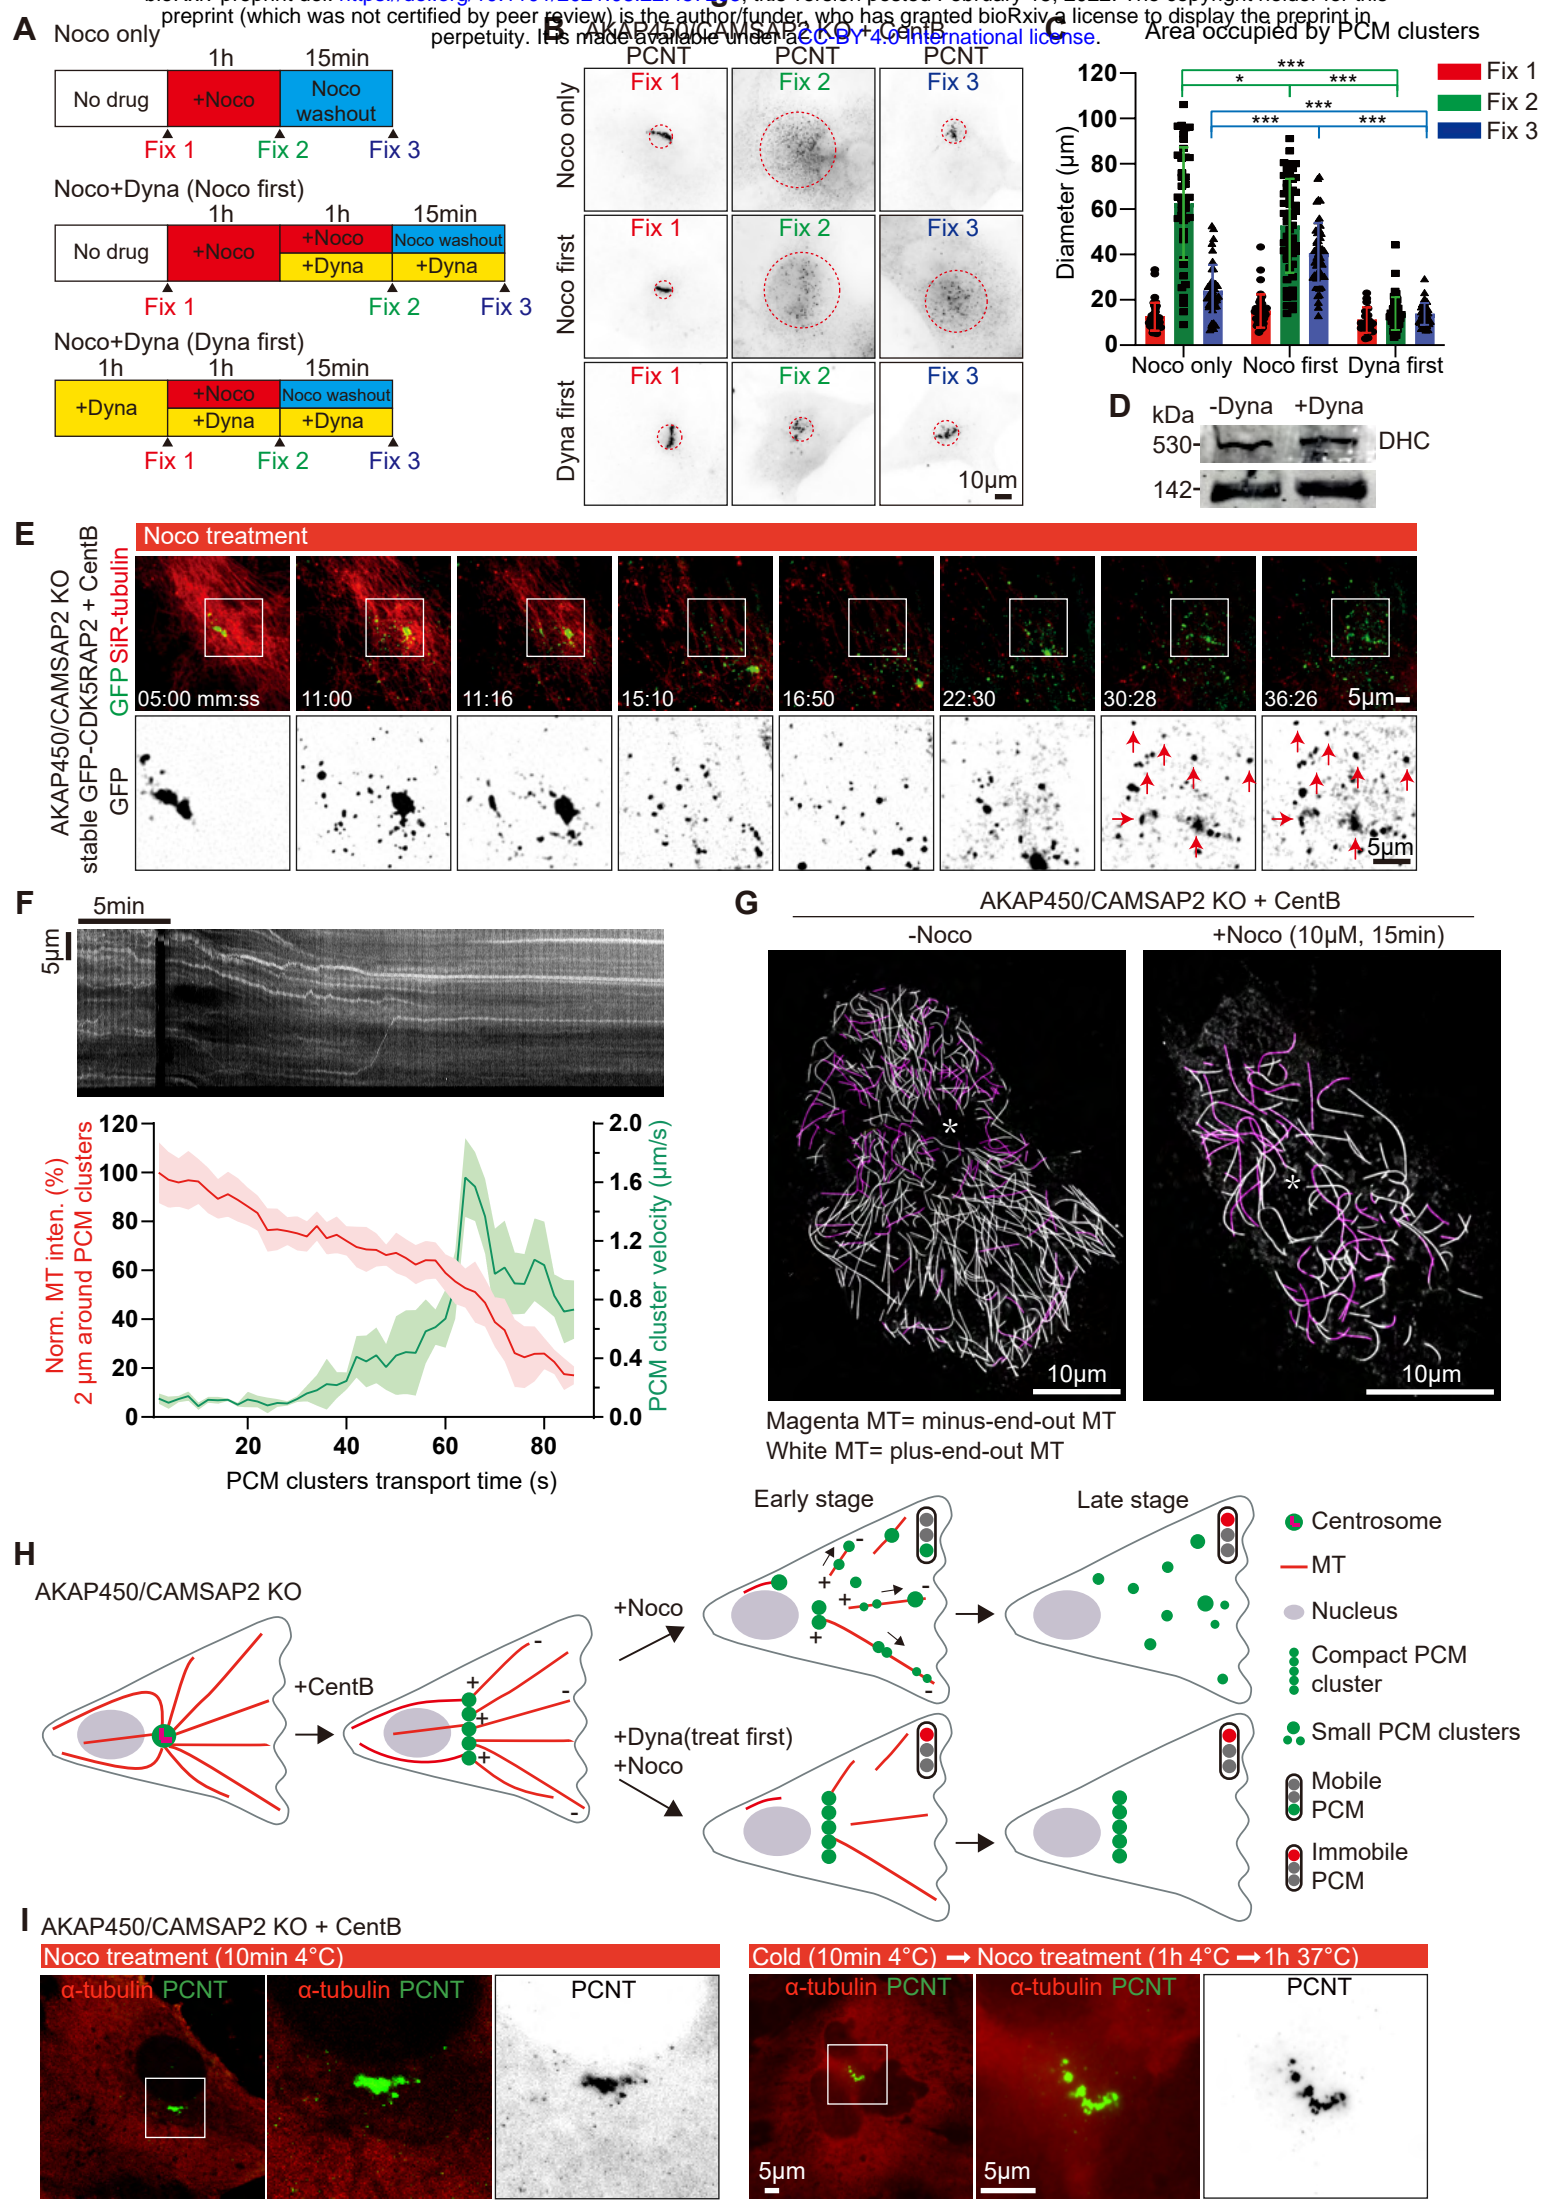

## Figure 5

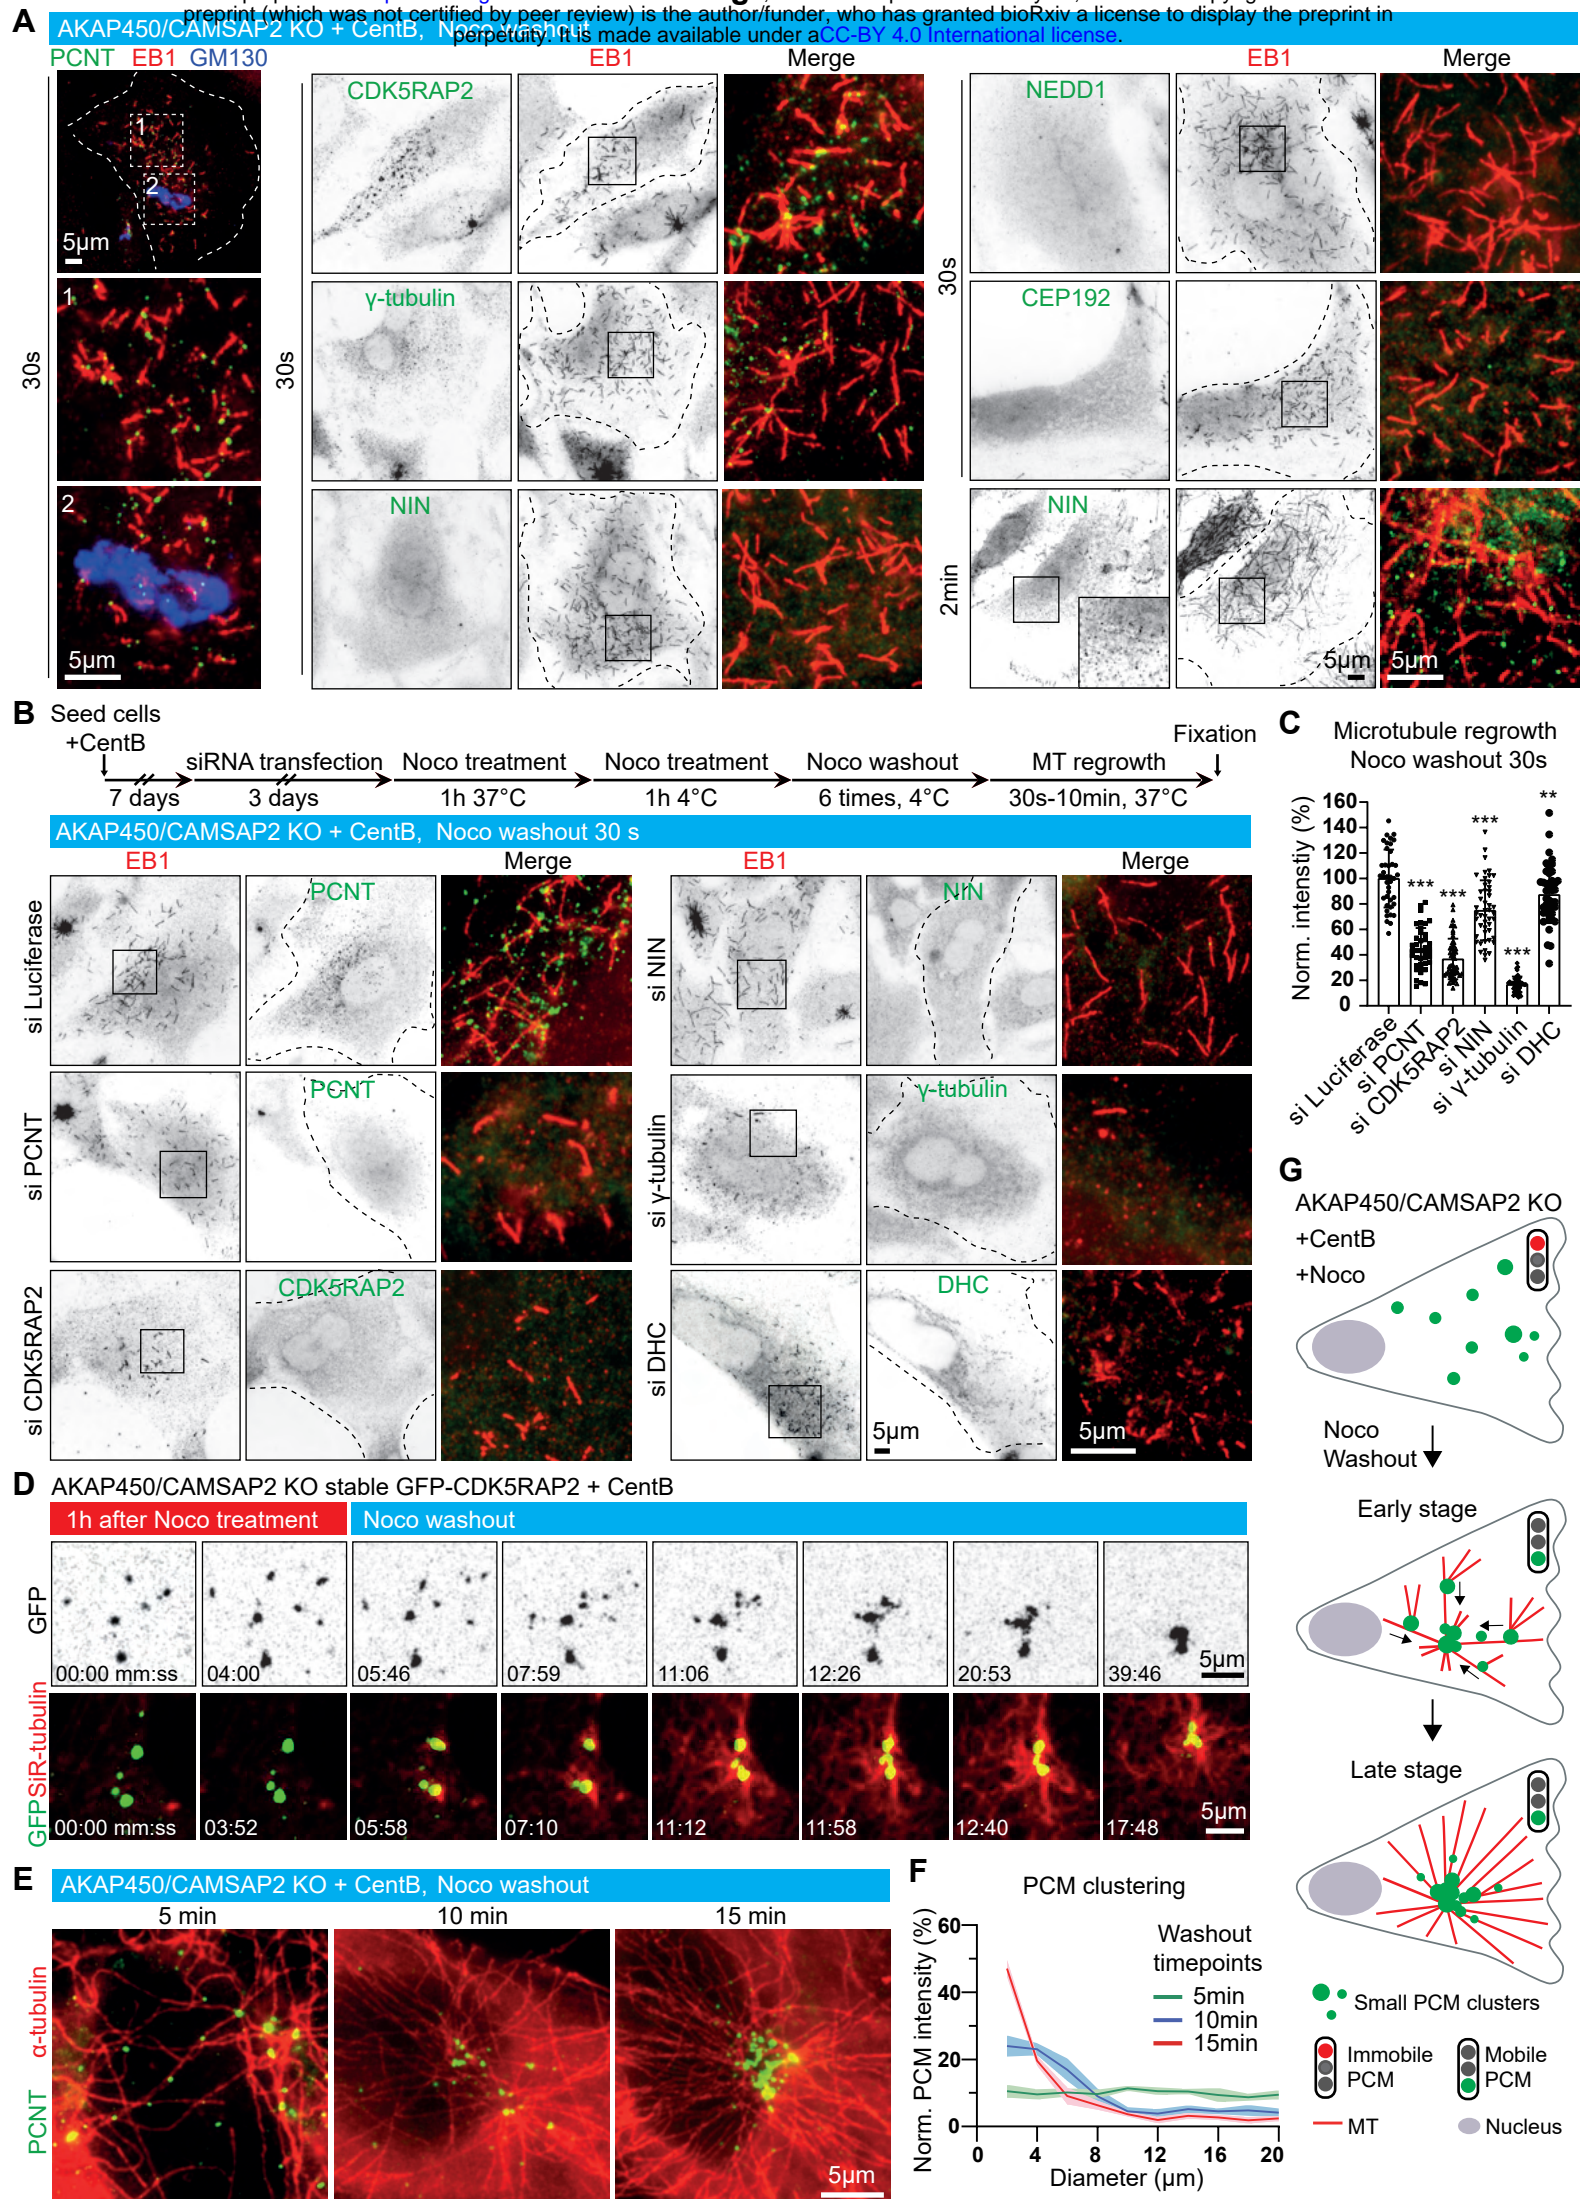

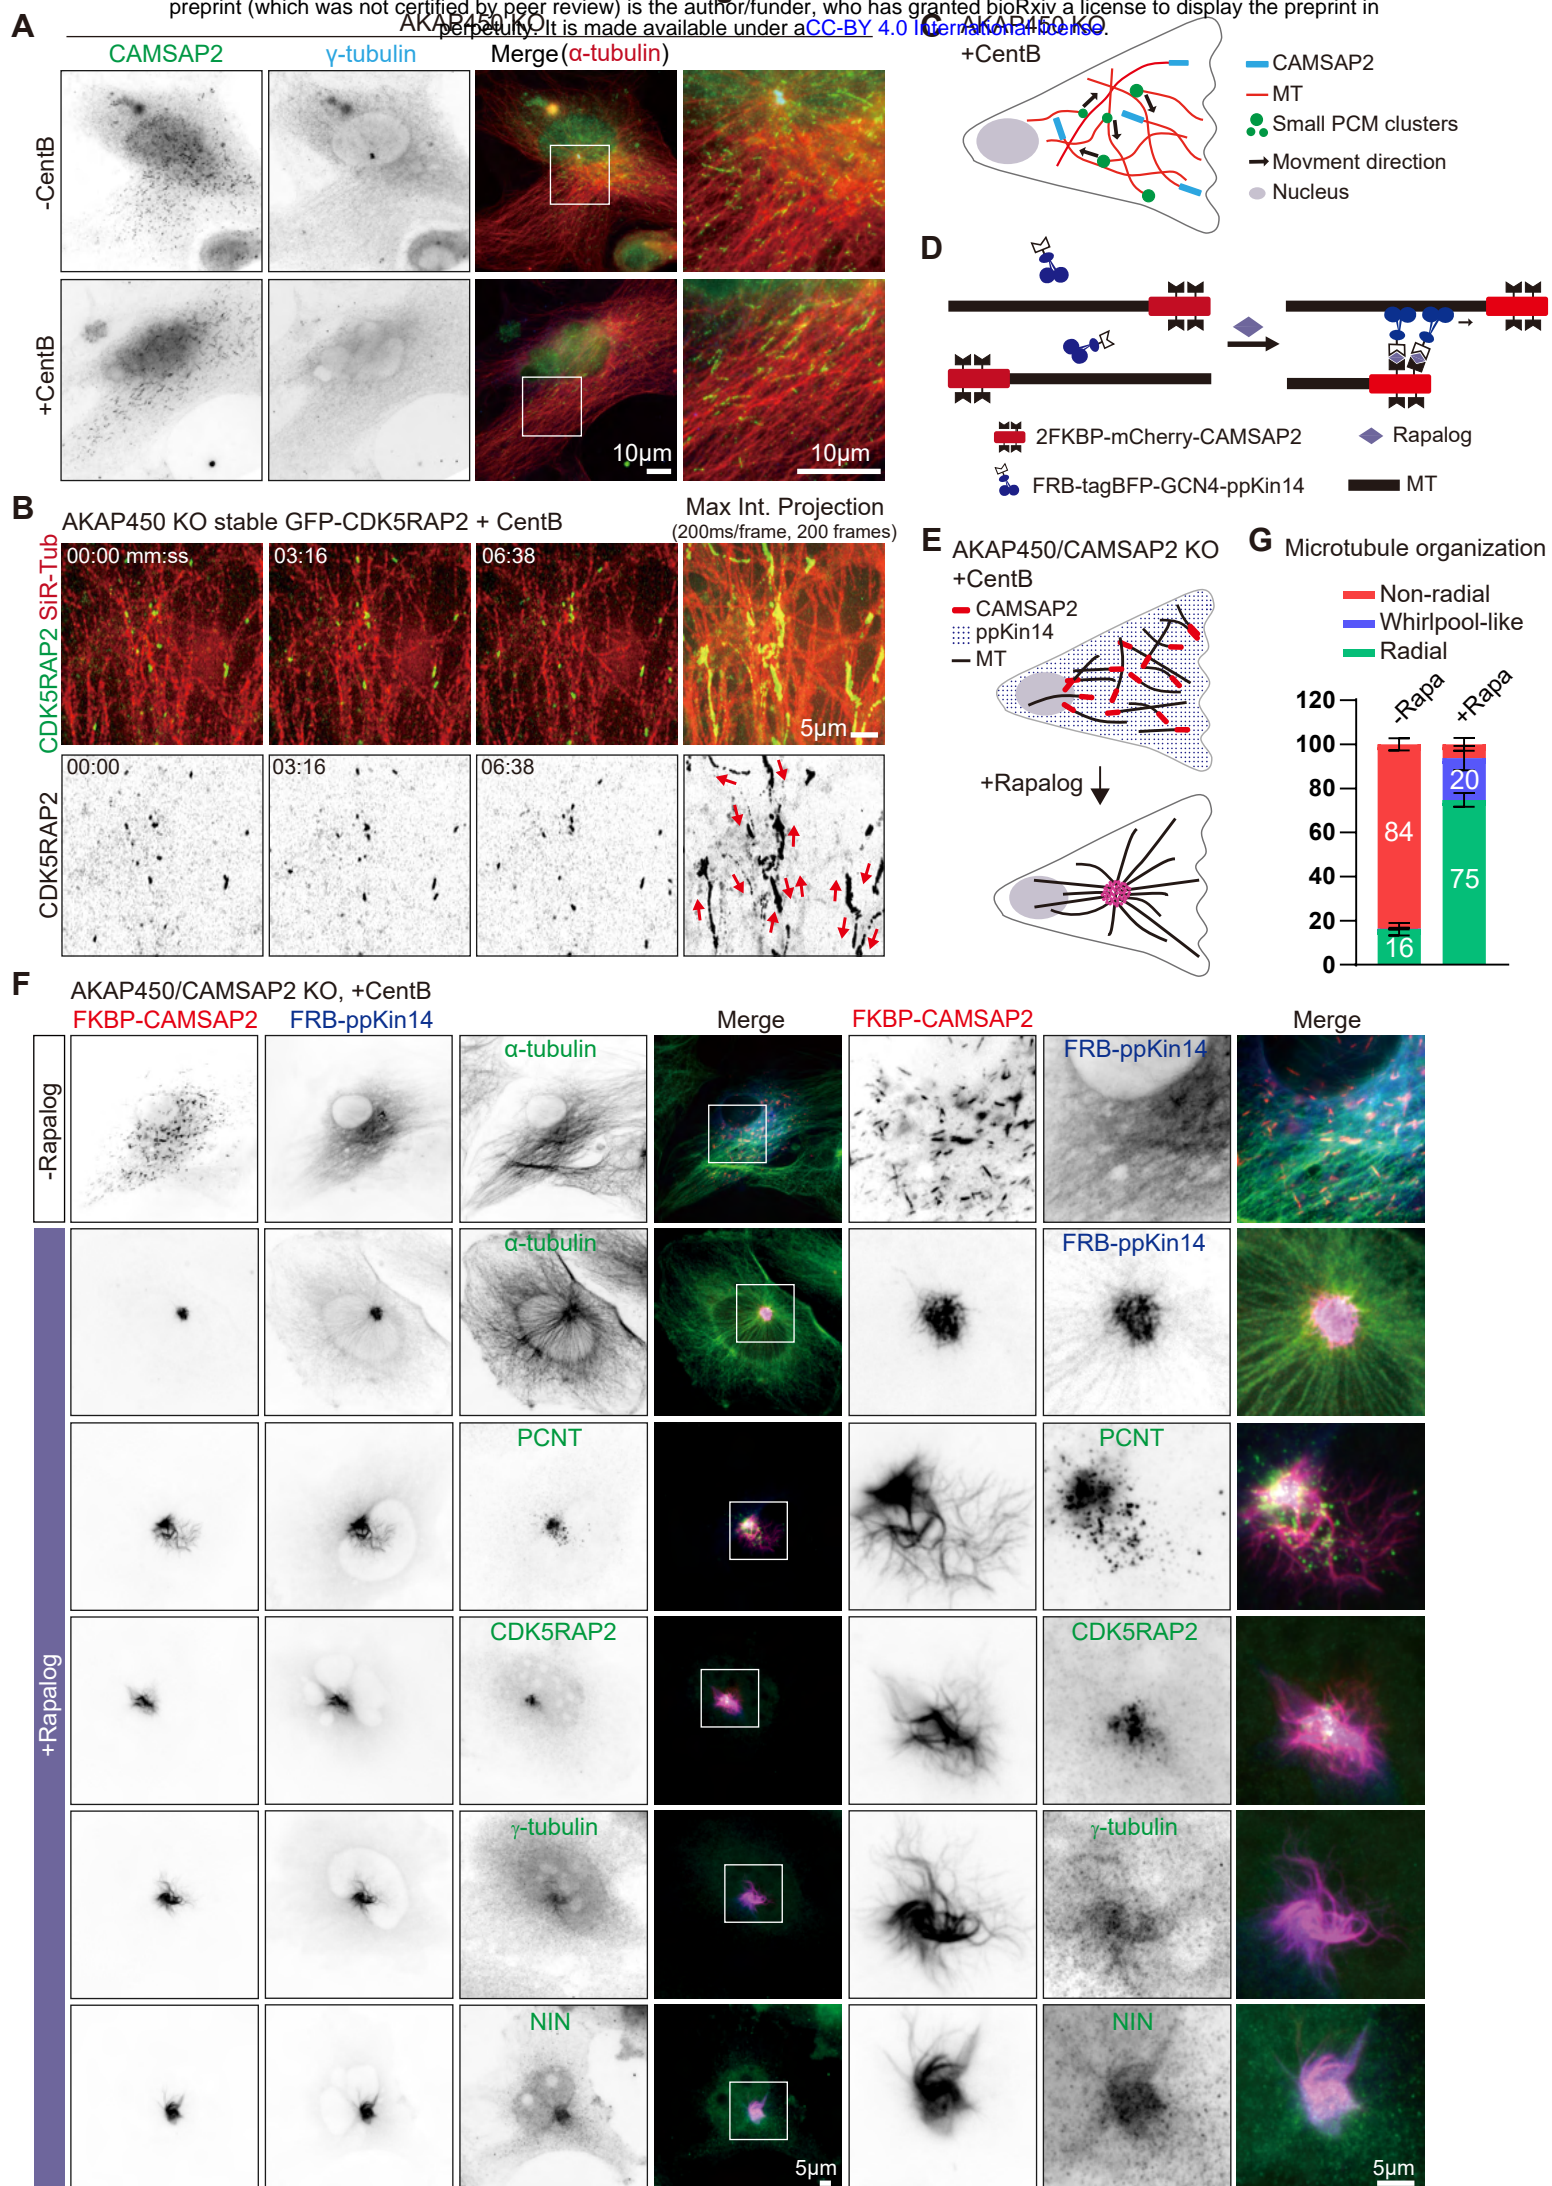

**Figure 7**

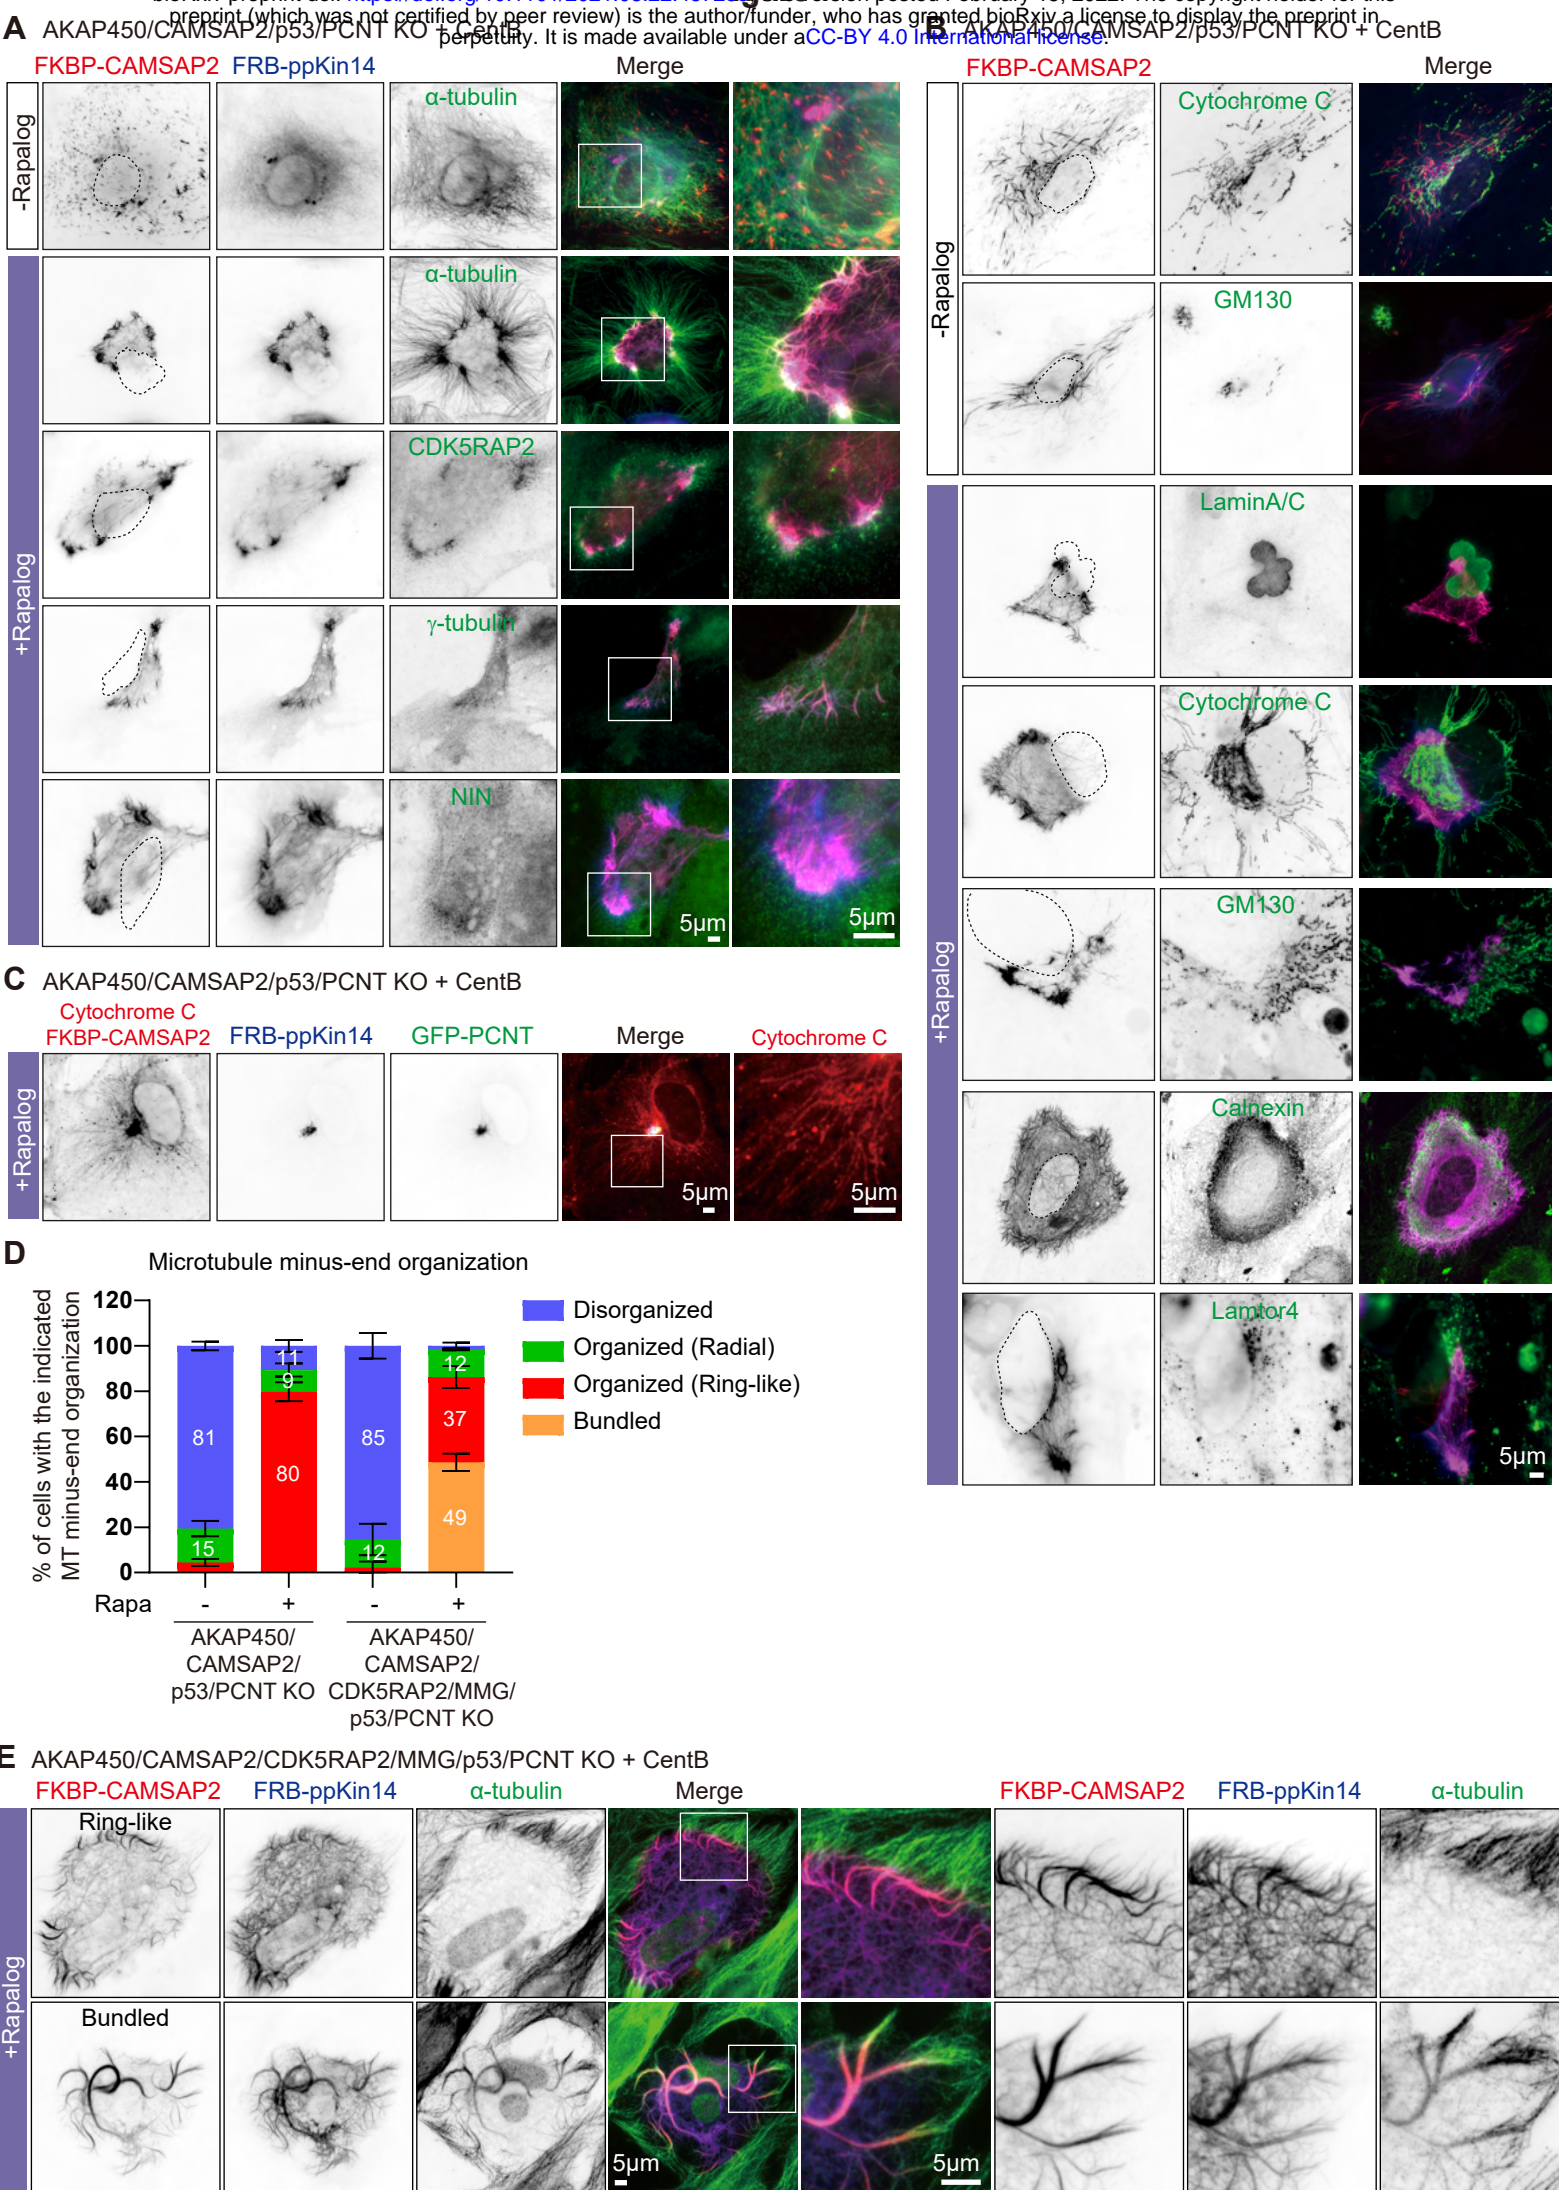

**Figure 8**

**A** 300 adhesive PCM complexes (all MT-nucleating)

**B** 300 non-adhesive PCM complexes (all MT-nucleating)

**C** 300 adhesive PCM complexes (50 MT-nucleating) 300 immobile MTs

**D** 300 strongly adhesive PCM complexes (50 MT-nucleating) 300 immobile MTs

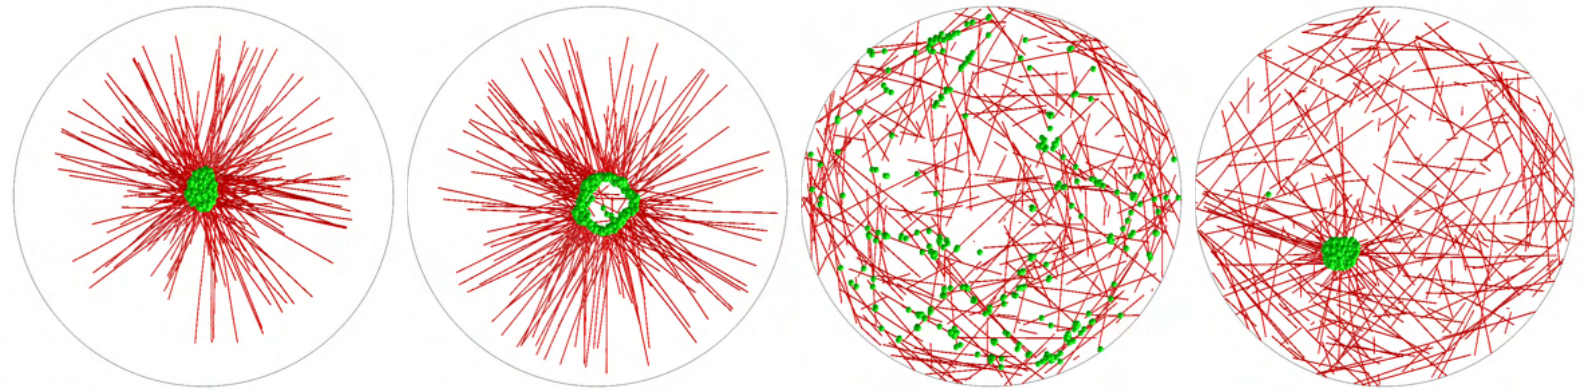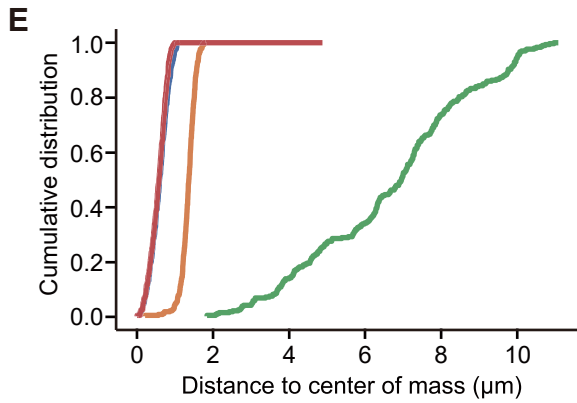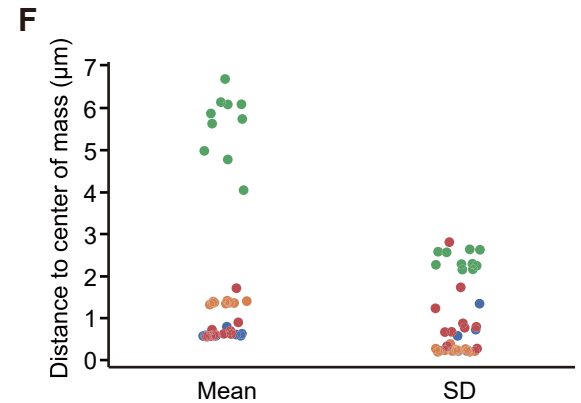

**G** 300 non-adhesive CAMSAP-kin14 complexes (all MT-nucleating)

**H** 300 adhesive CAMSAP-kin14 complexes (all MT-nucleating)

**I** 150 non-adhesive CAMSAP-kin14 complexes (all MT-nucleating) 150 adhesive PCM complexes (all MT-nucleating)

**J** 150 non-adhesive CAMSAP-kin14 complexes (all MT-nucleating) 150 non-adhesive PCM complexes (all MT-nucleating)

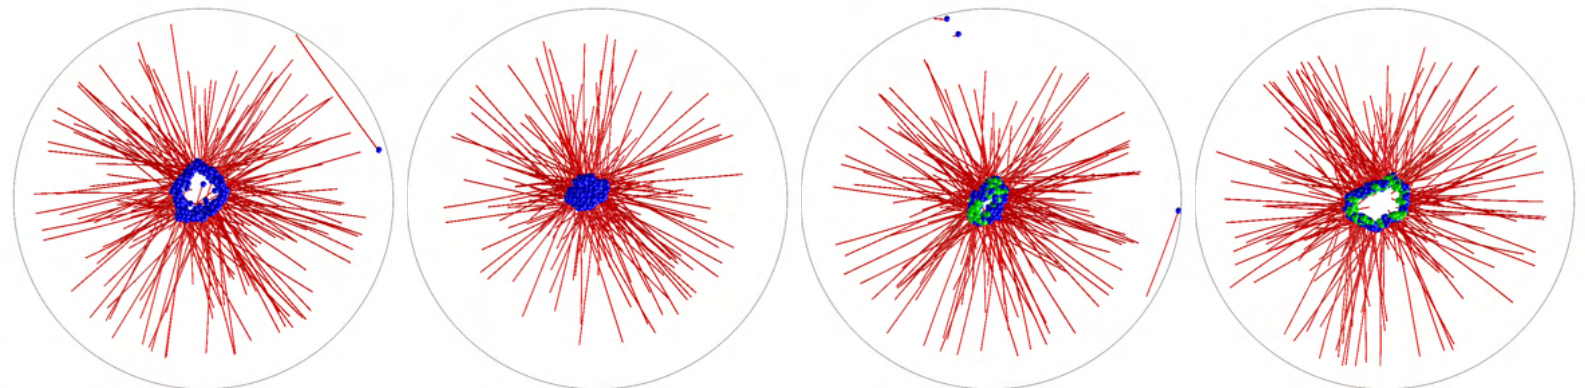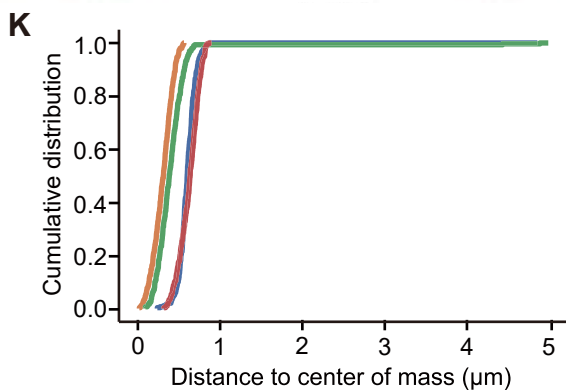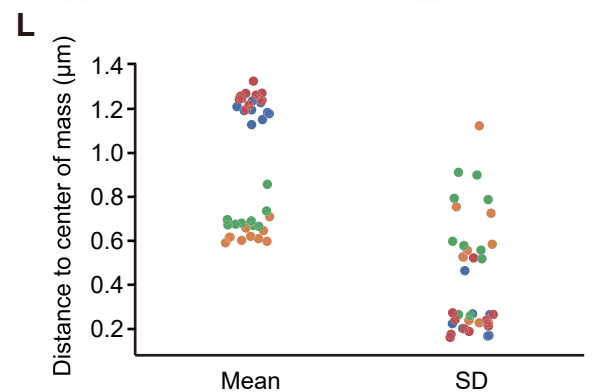

Figure 1-figure supplement 1

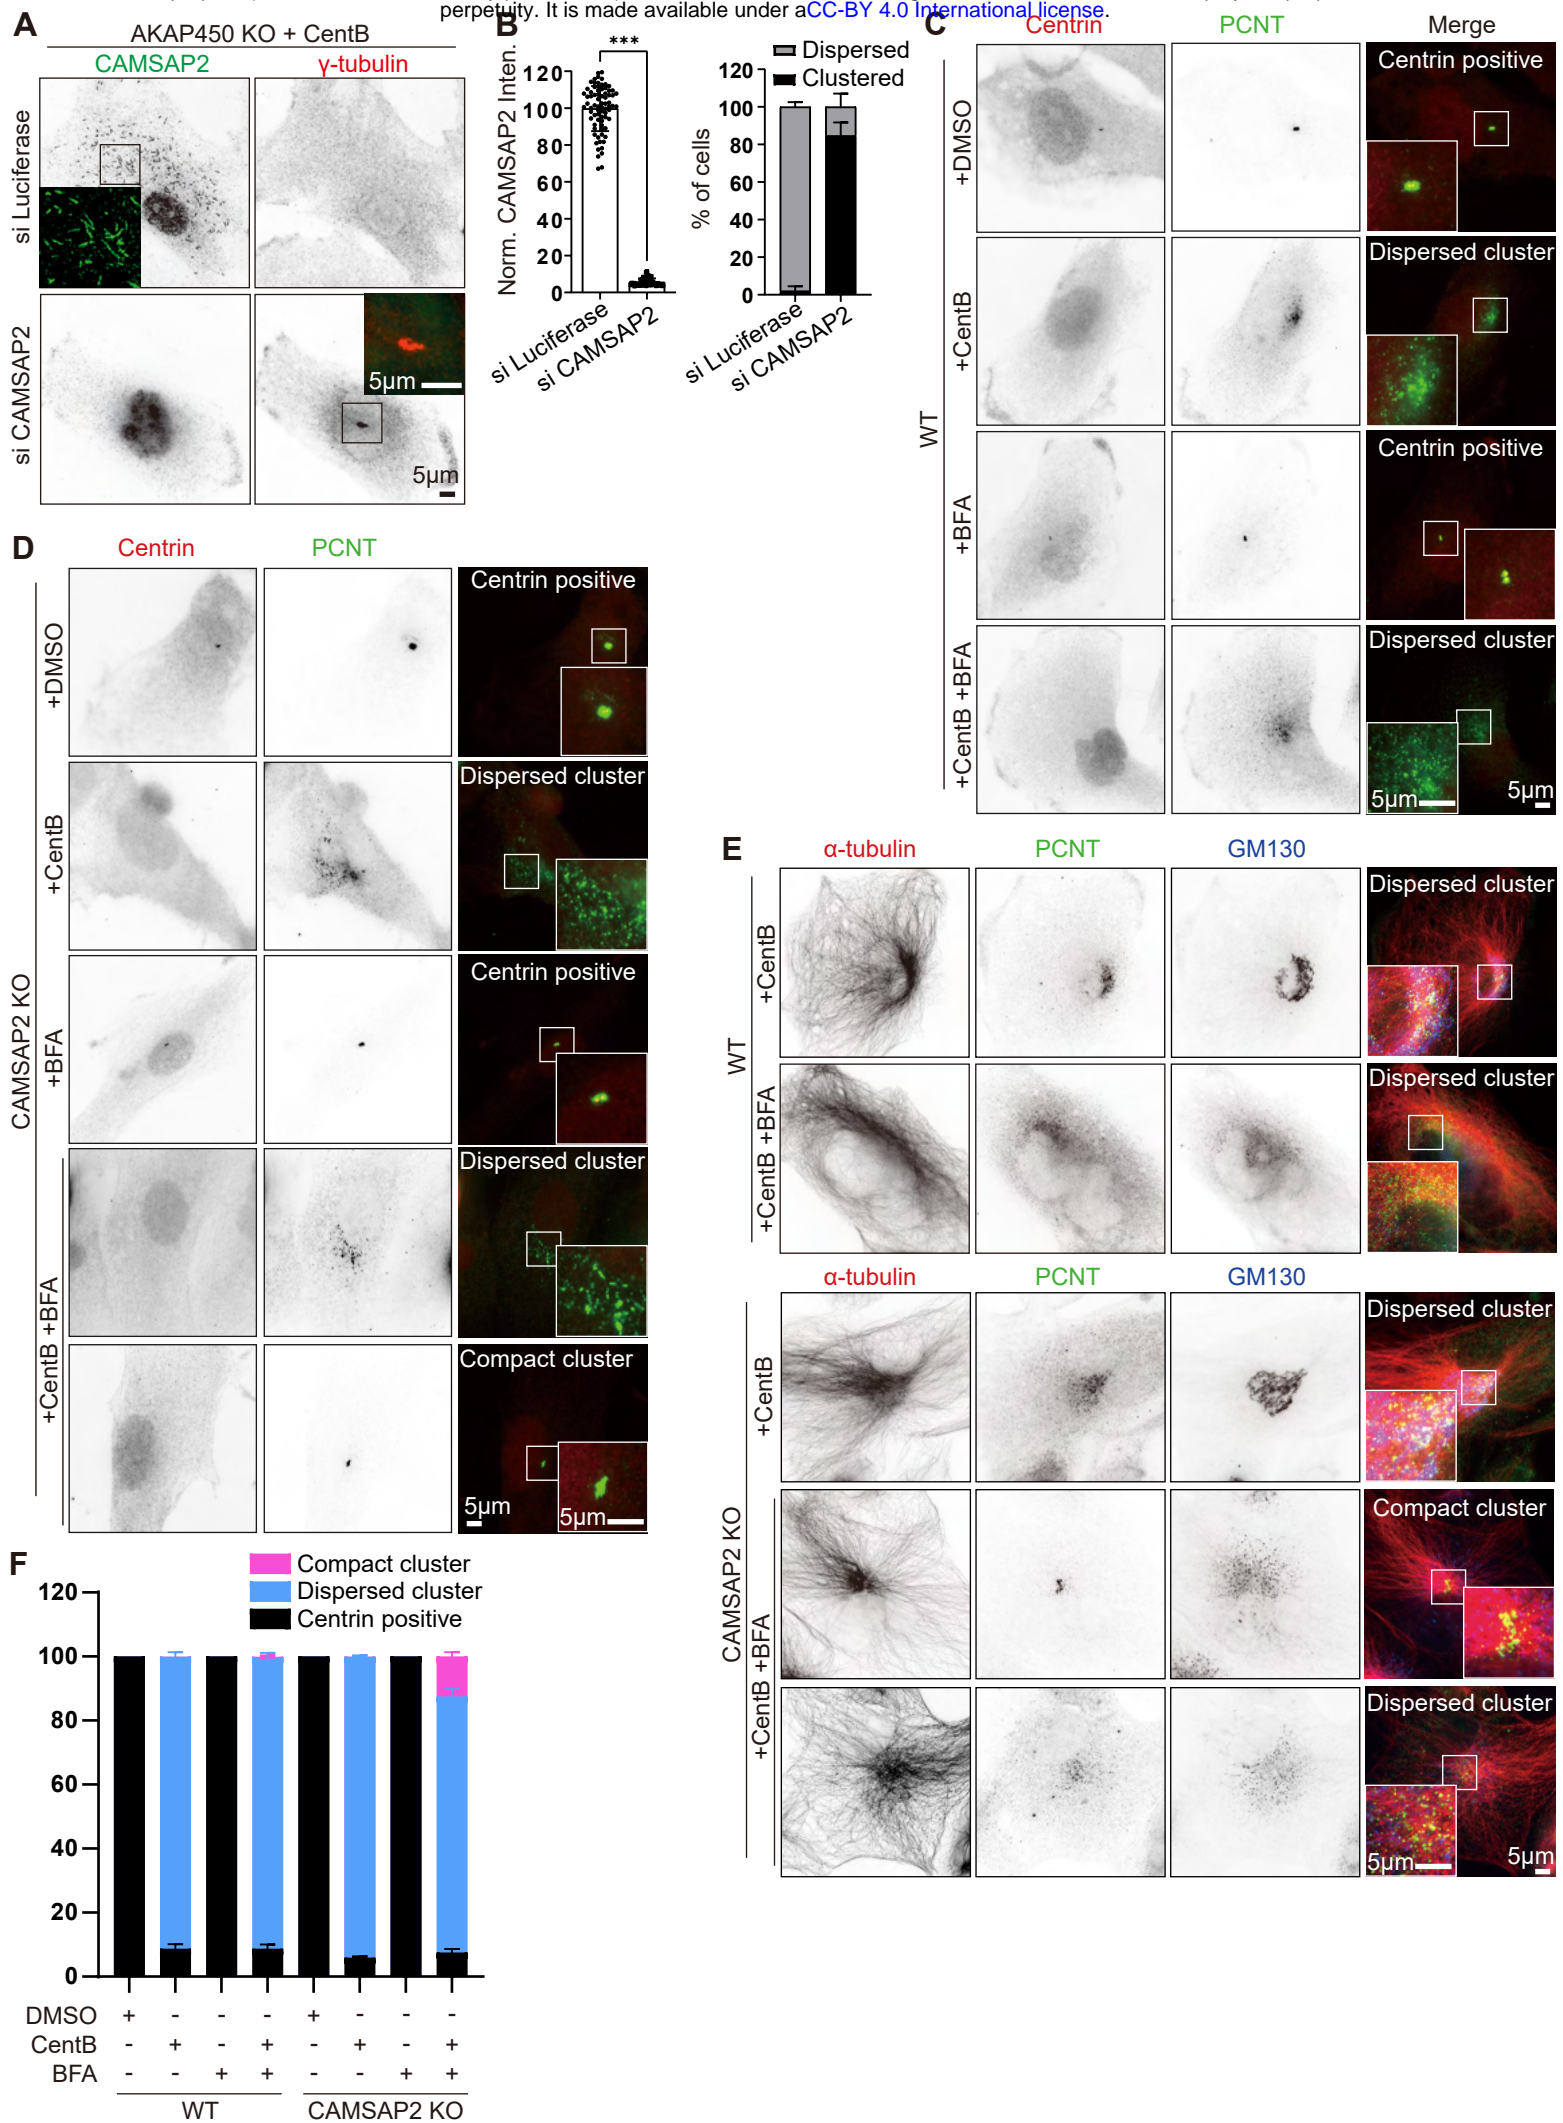

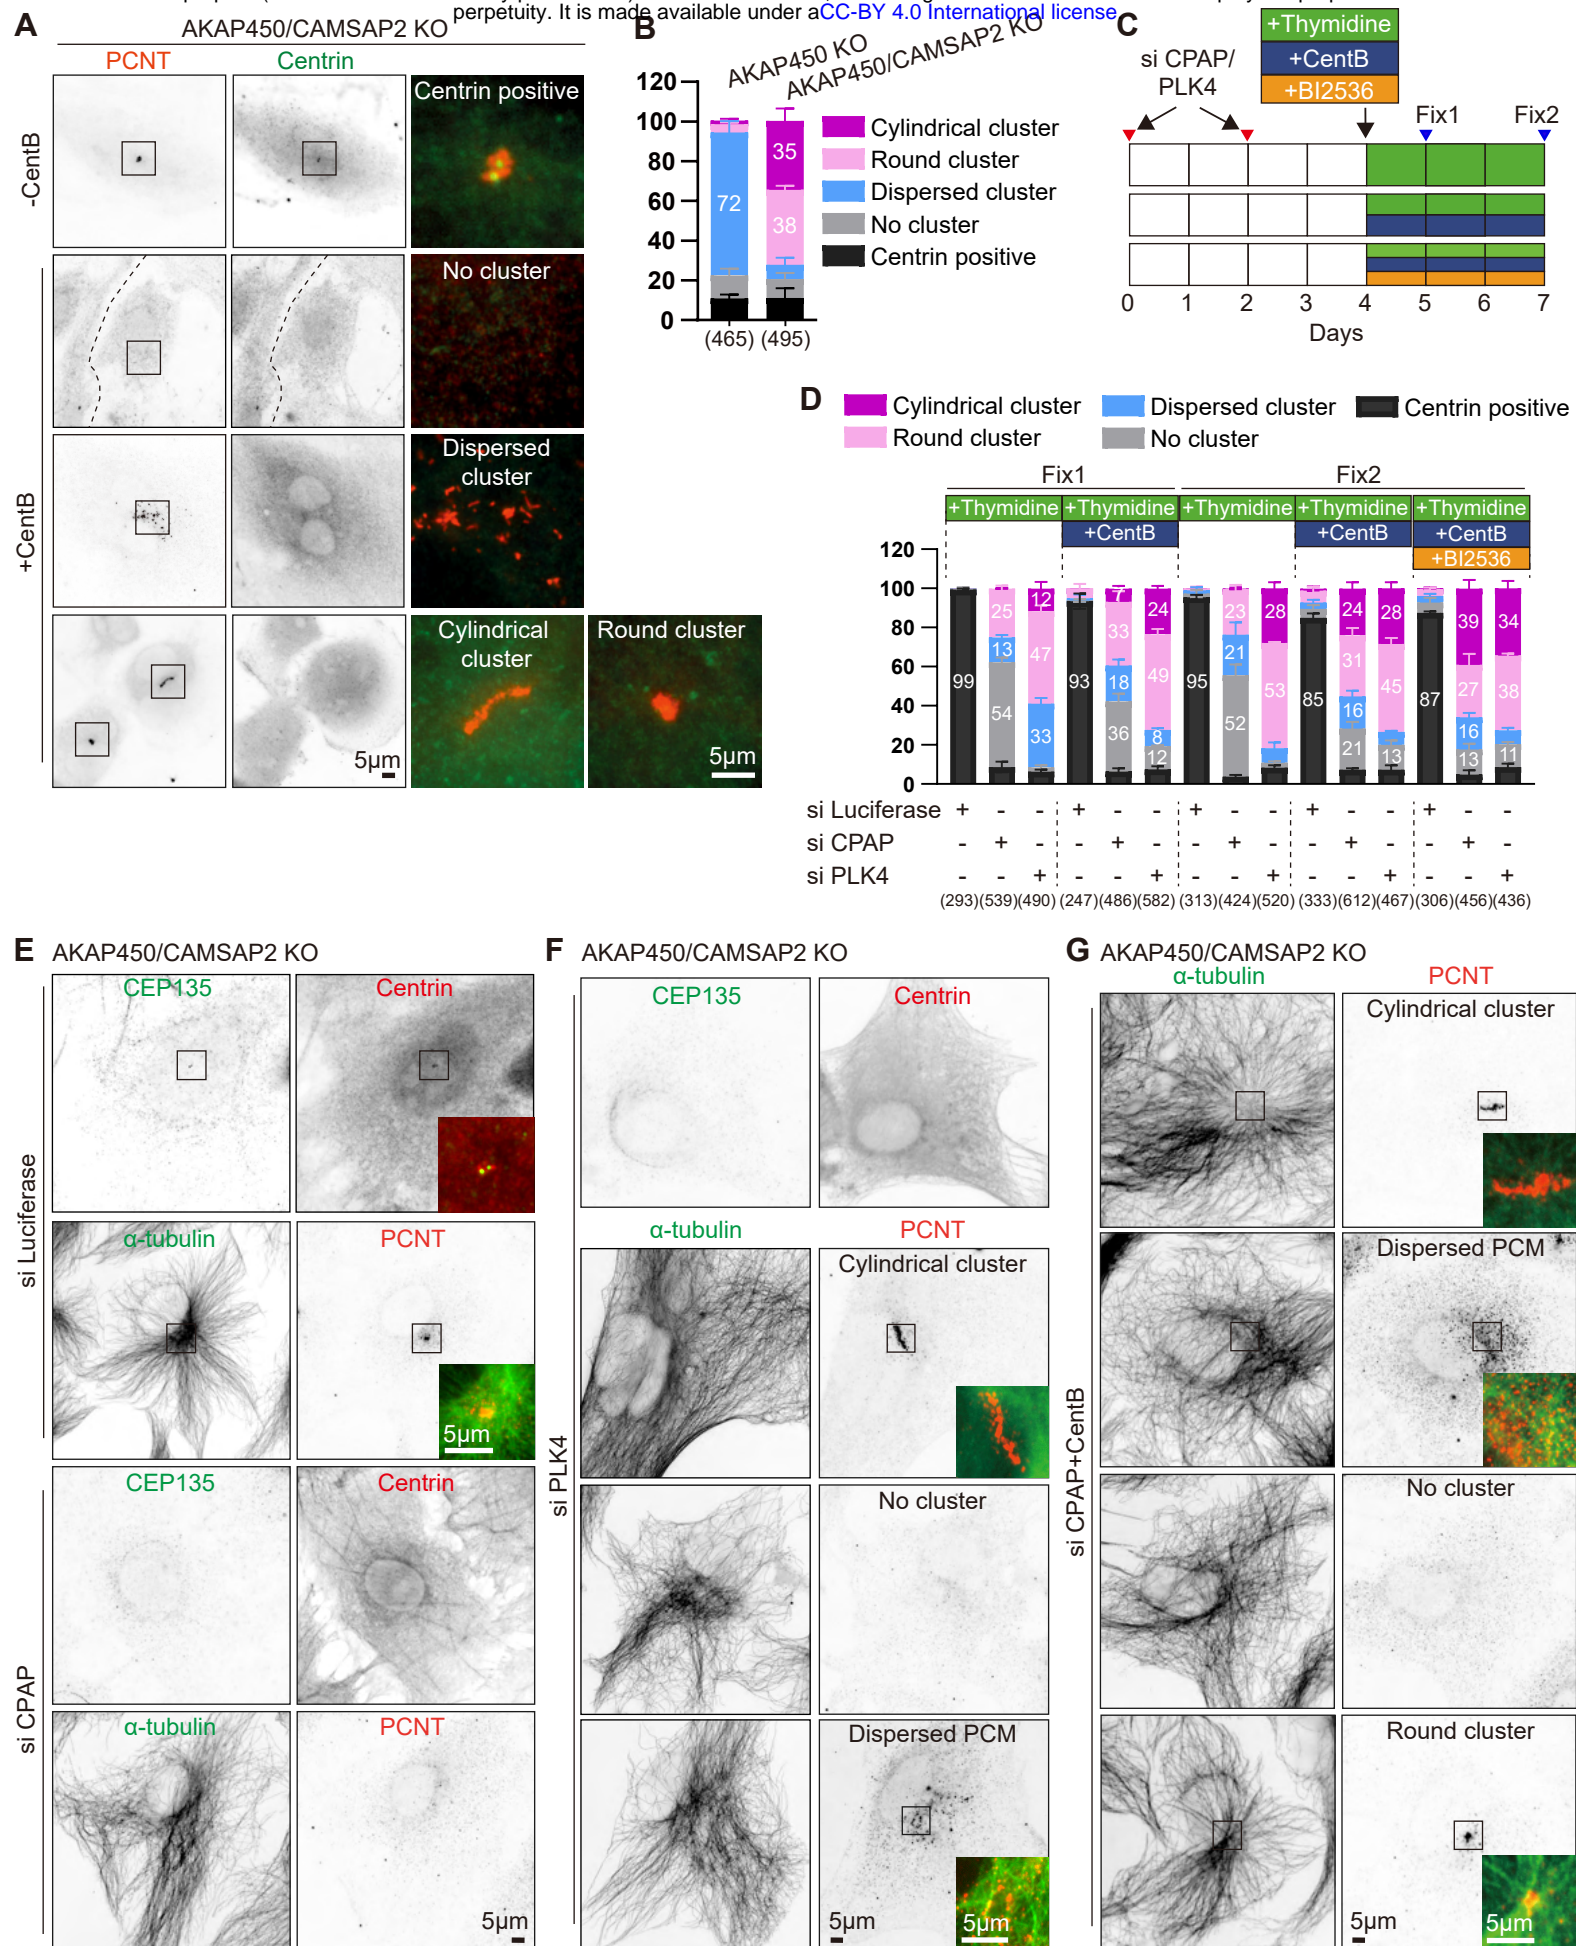



**A** WT stable GFP-CDK5RAP2

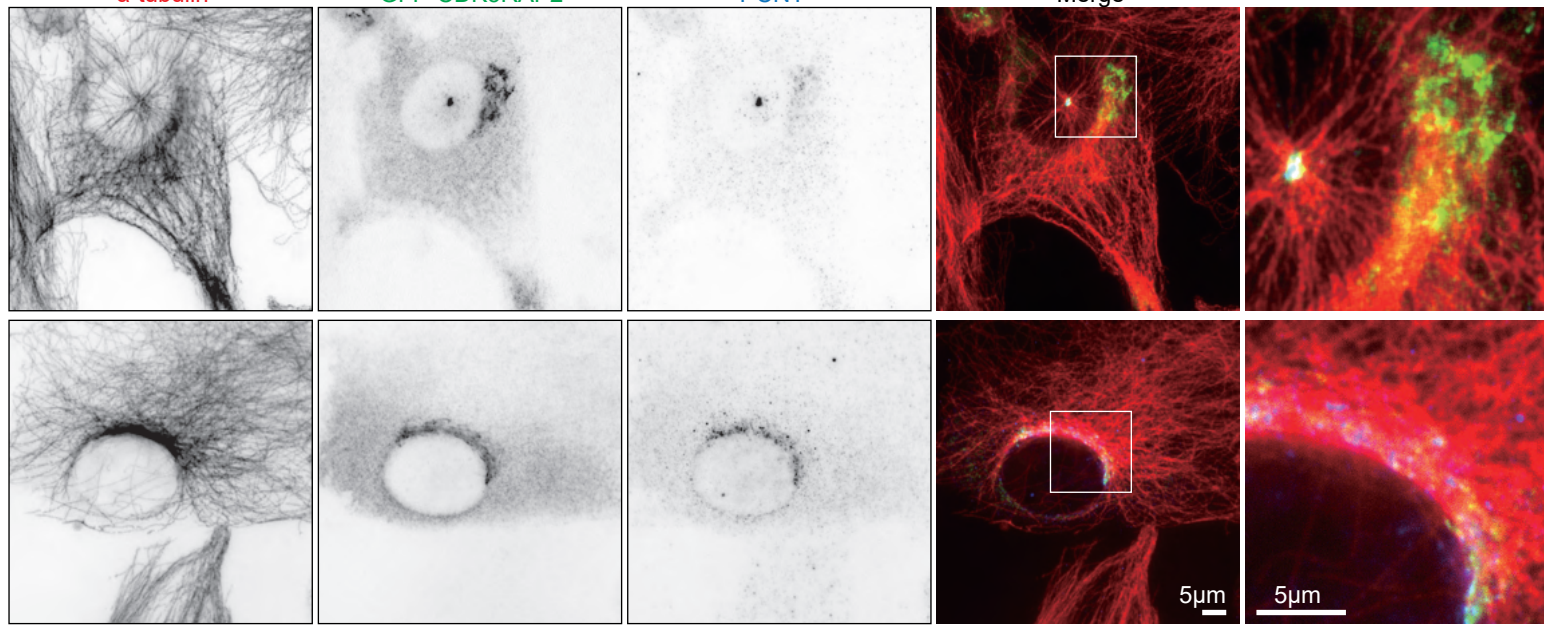

**B** AKAP450/CAMSAP2 KO stable GFP-CDK5RAP2 + CentB

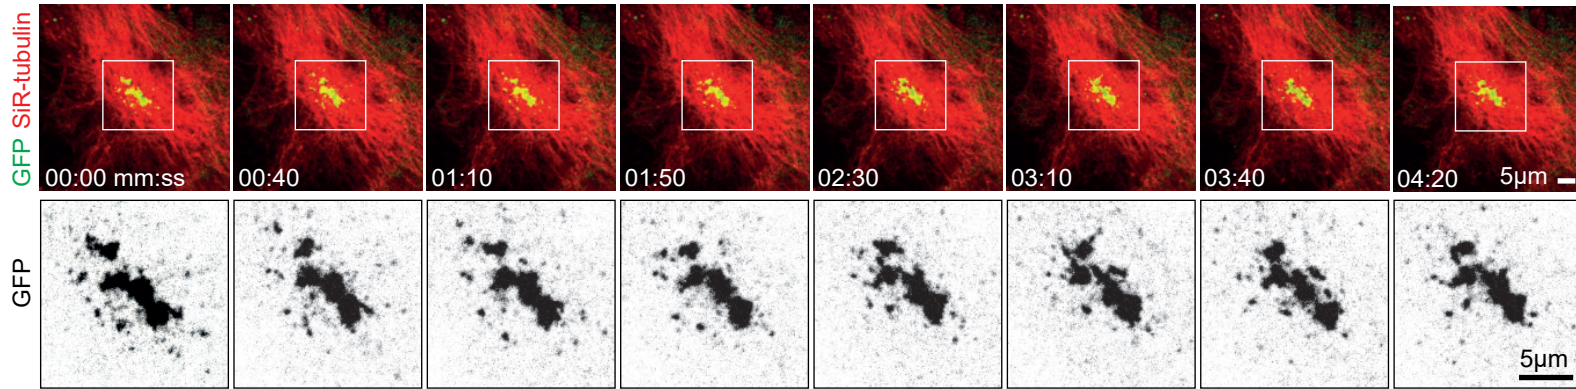

Figure 2- figure supplement 1

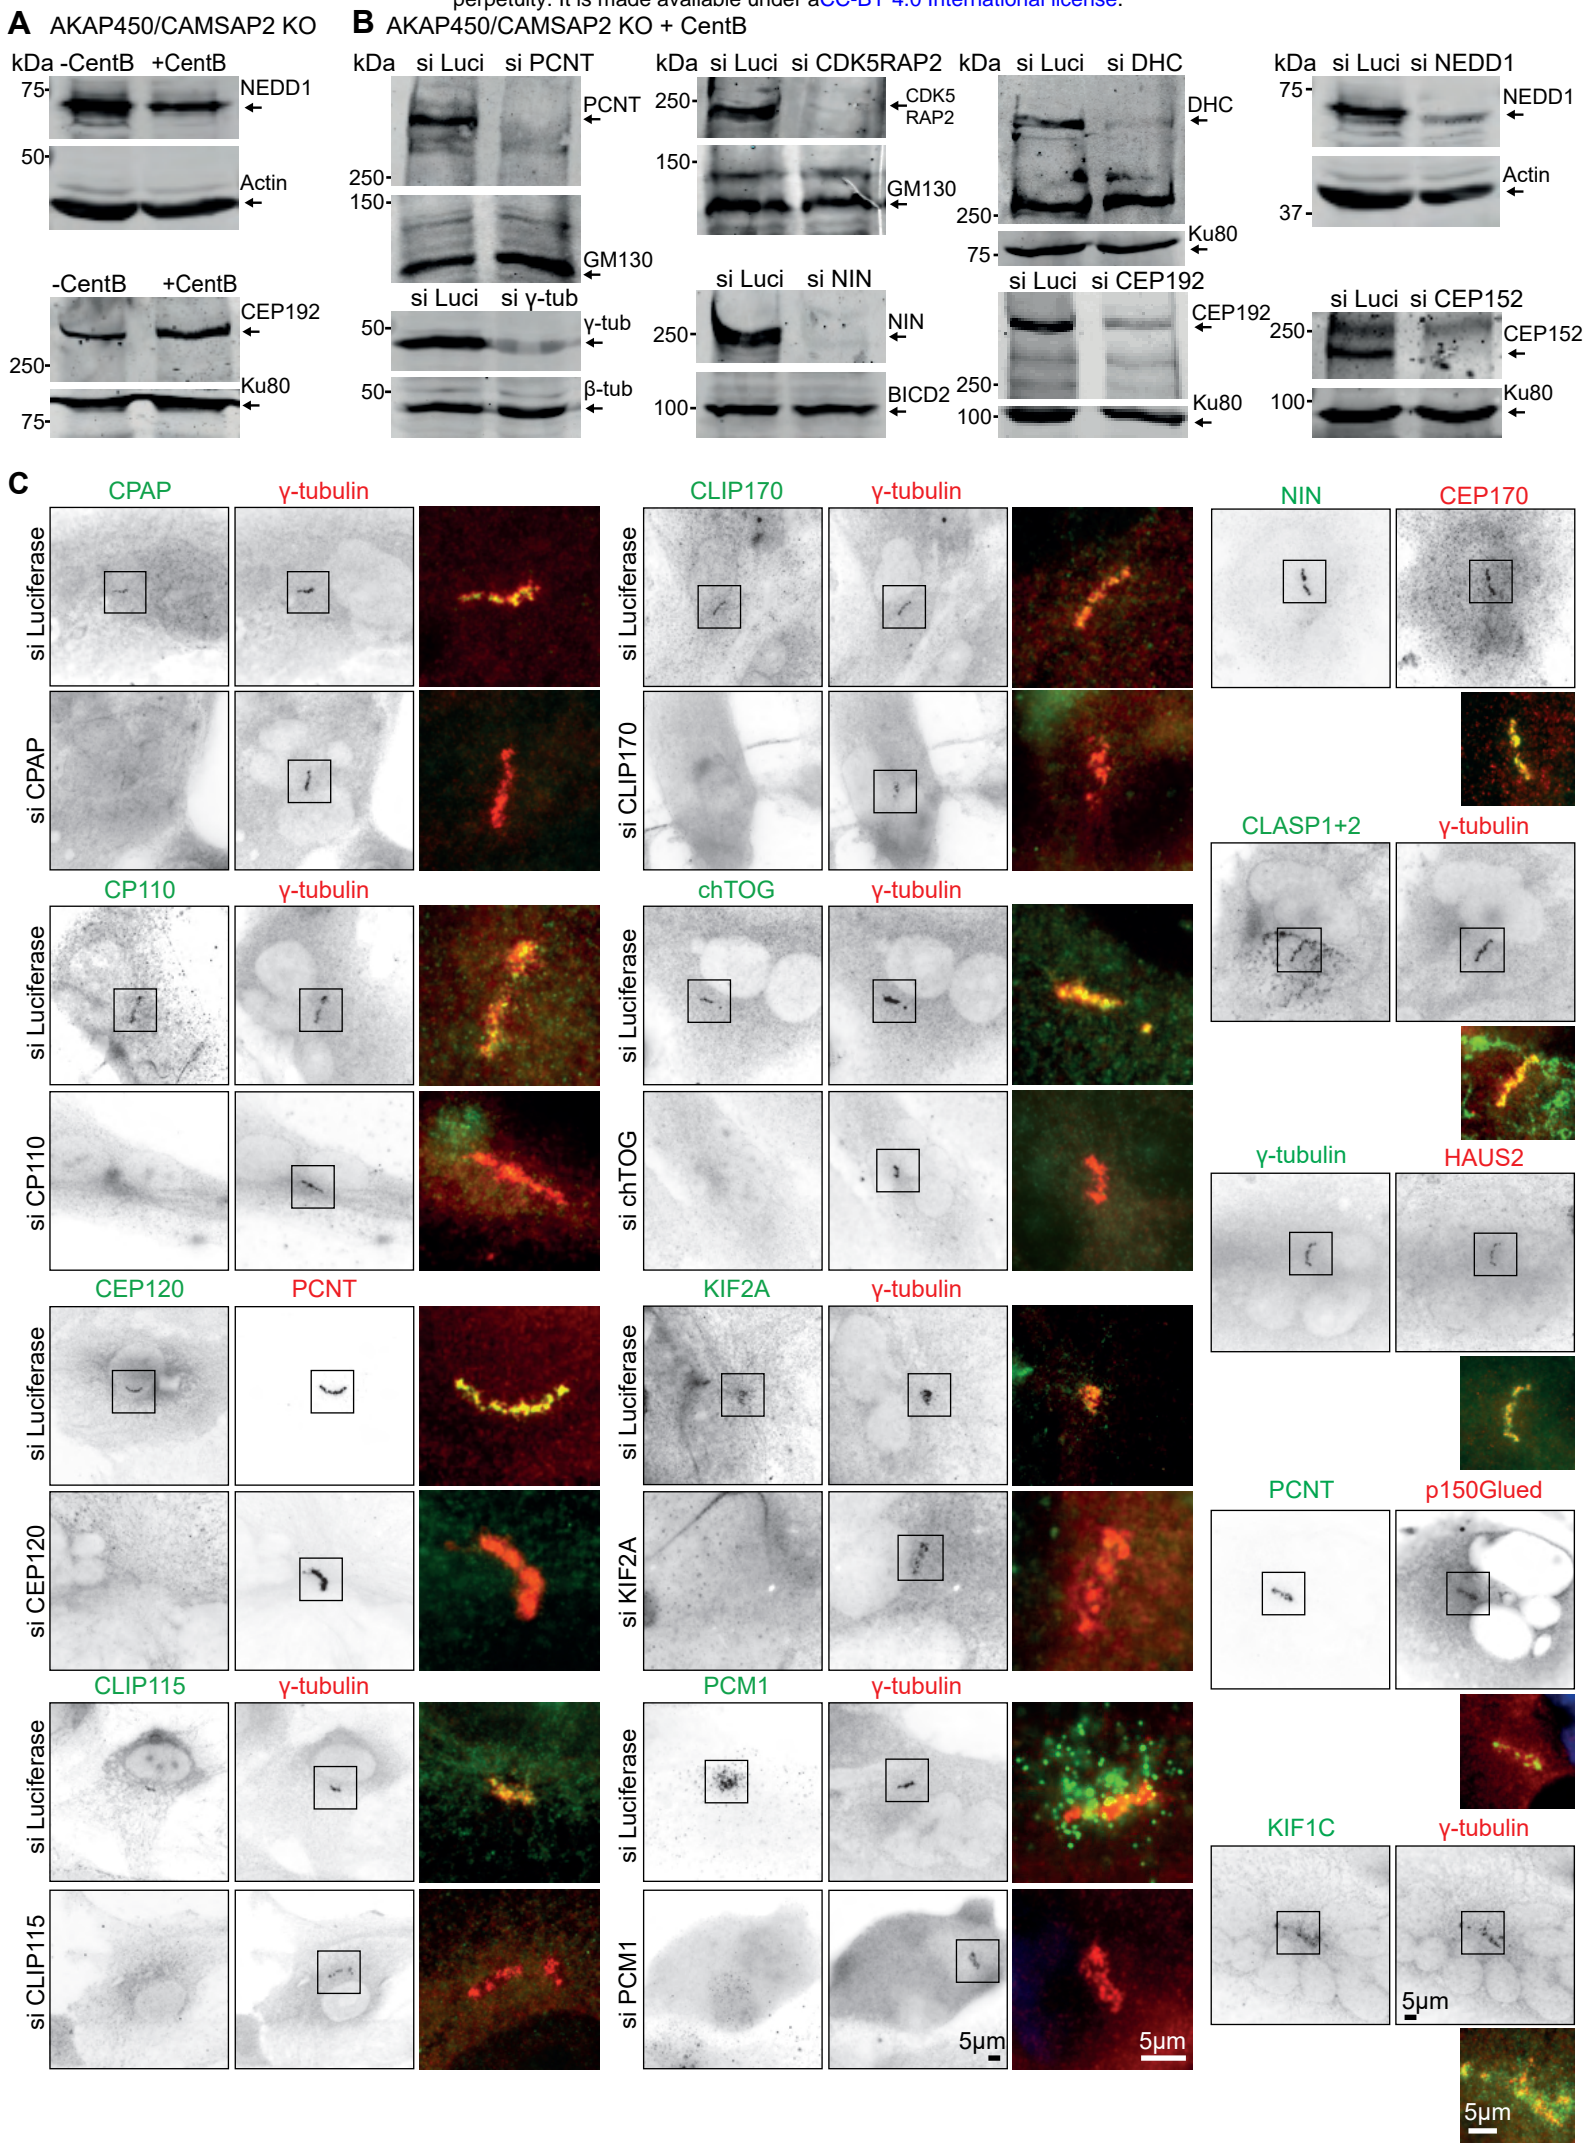

Figure 2 figure supplement 2

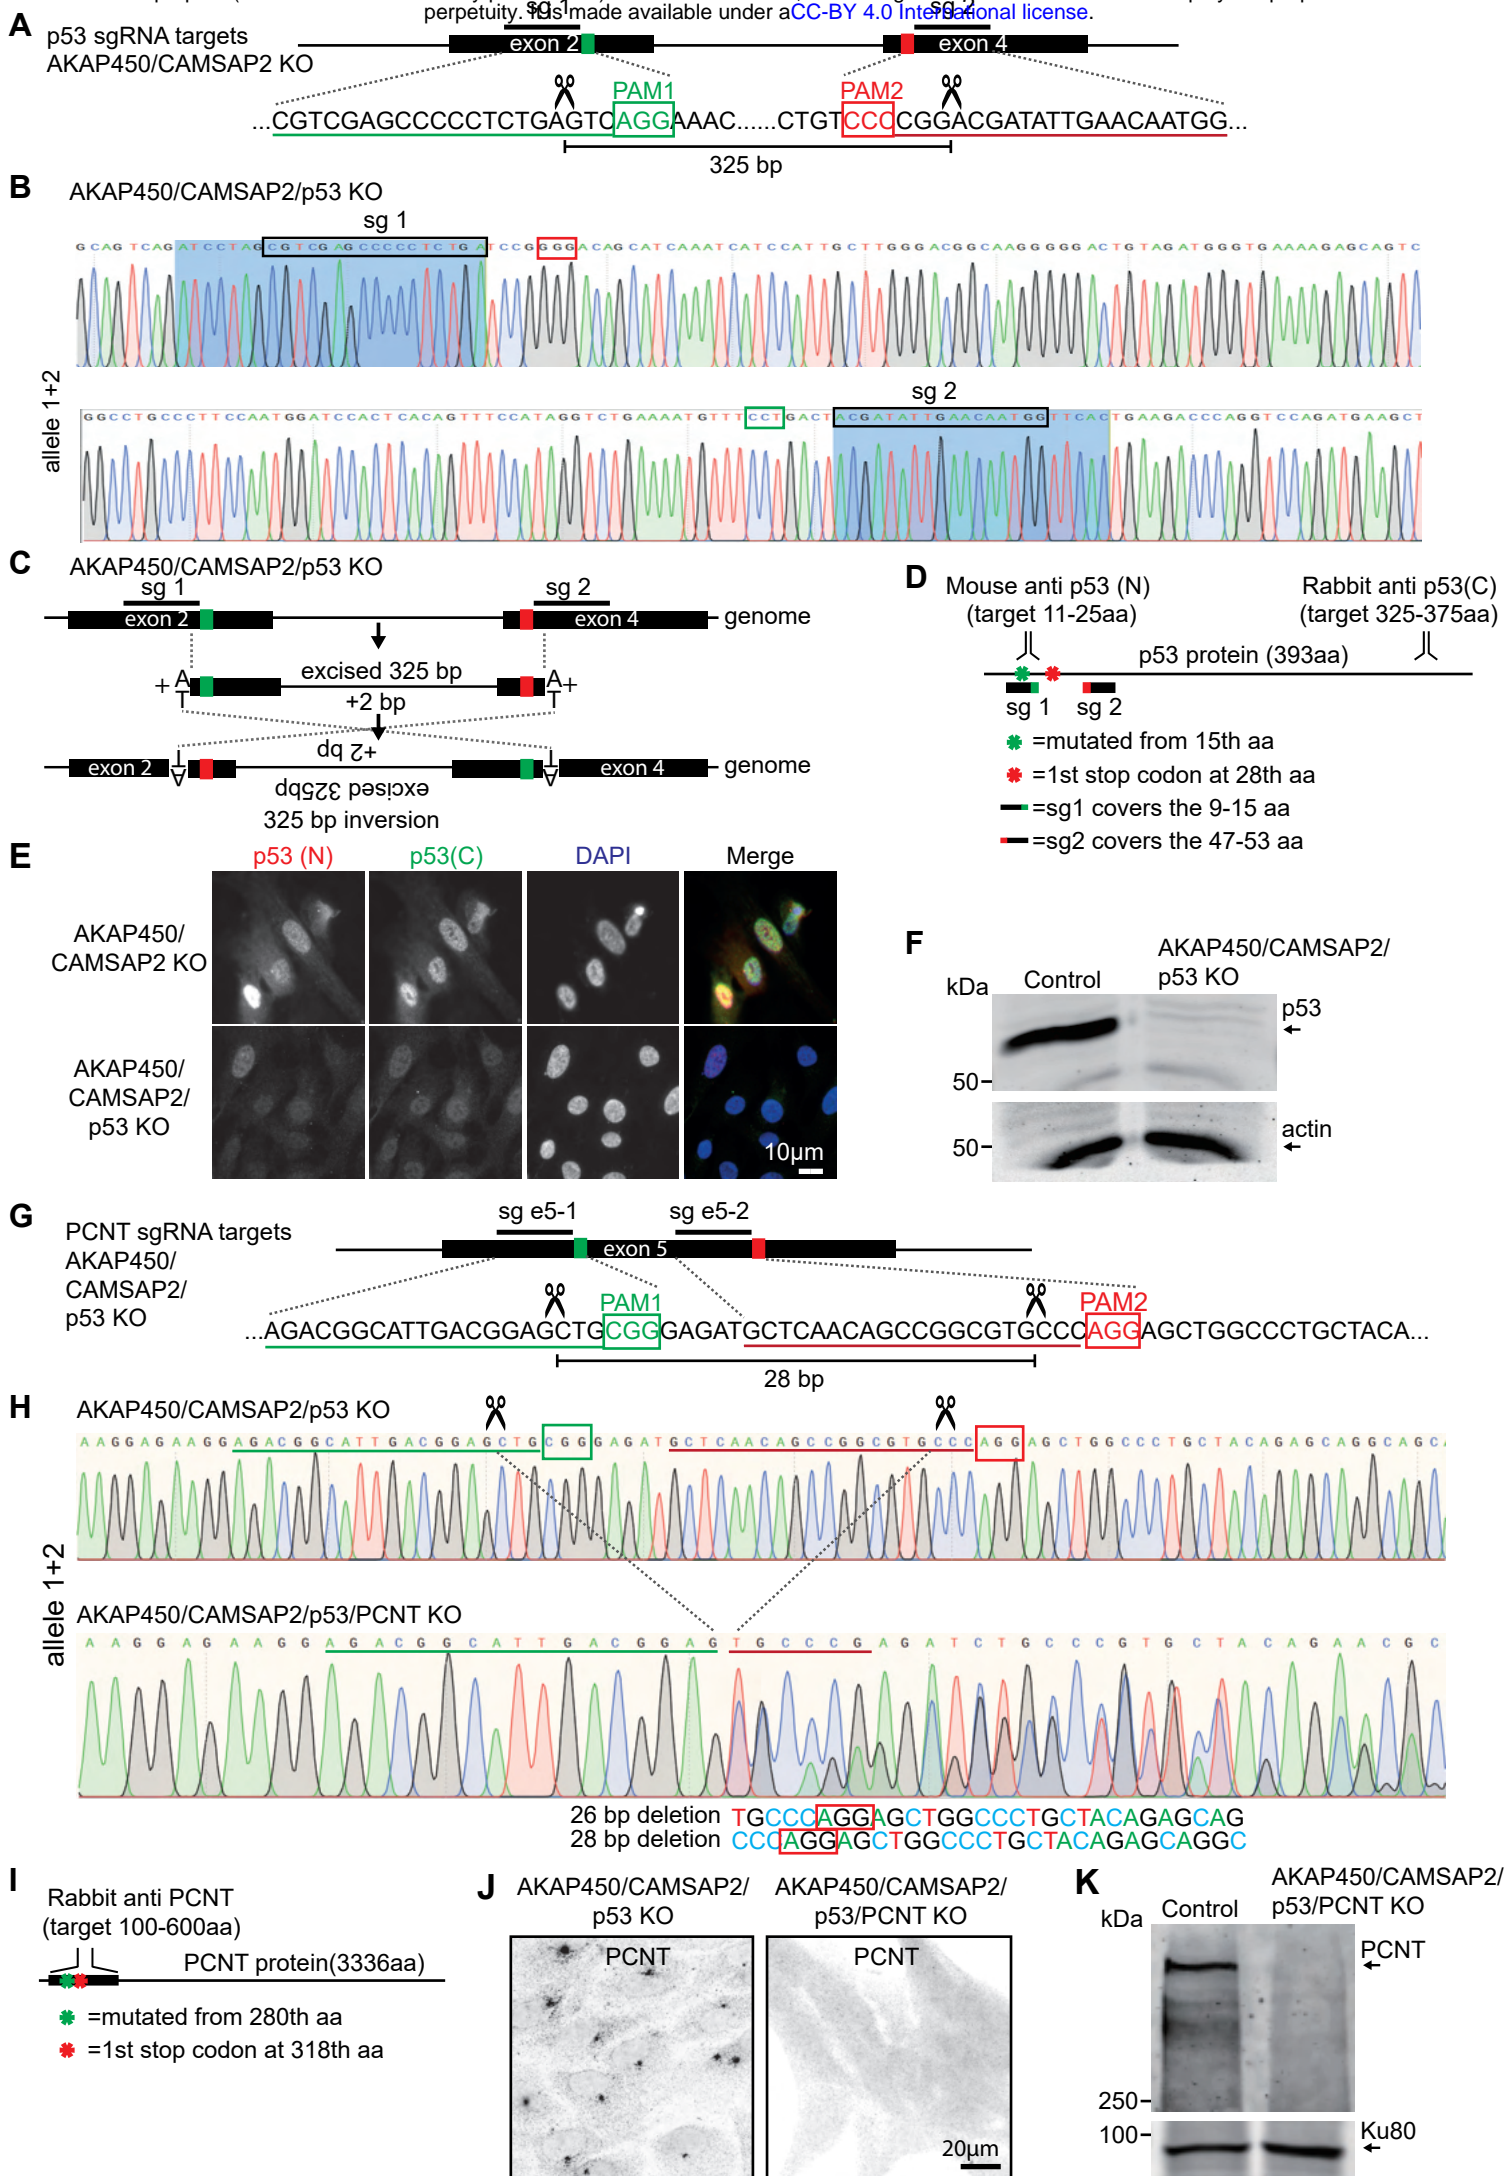

**Figure 2-figure supplement 3**

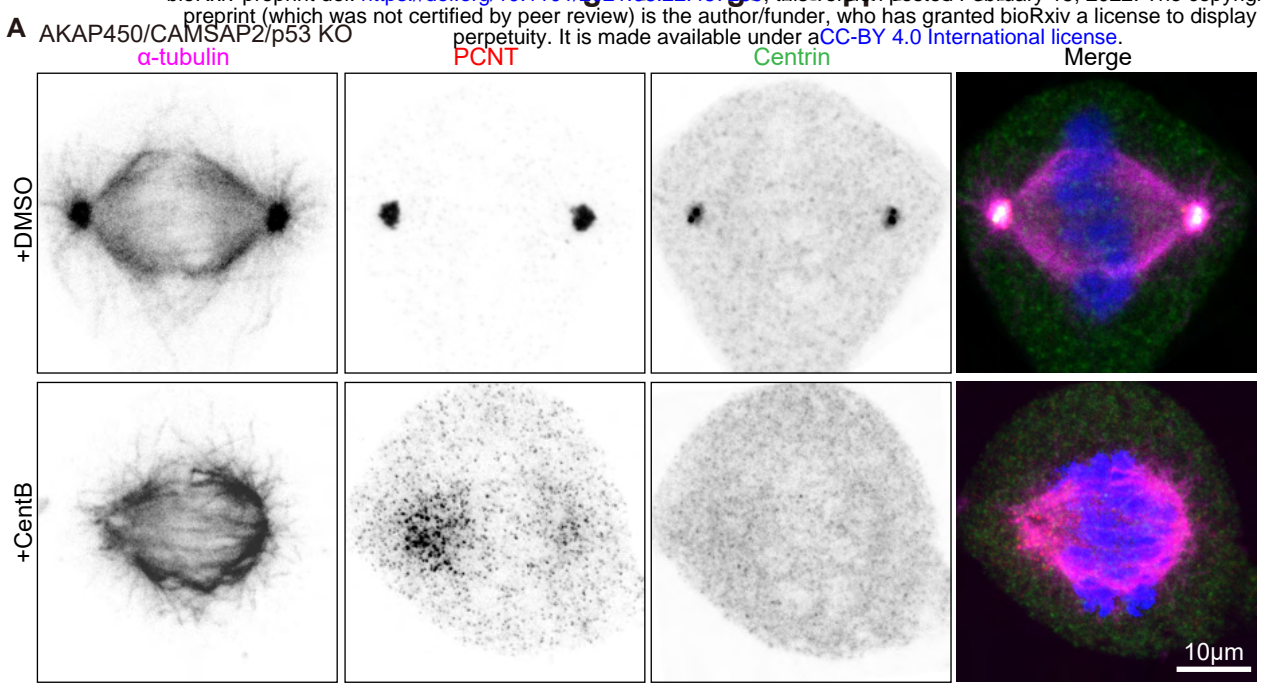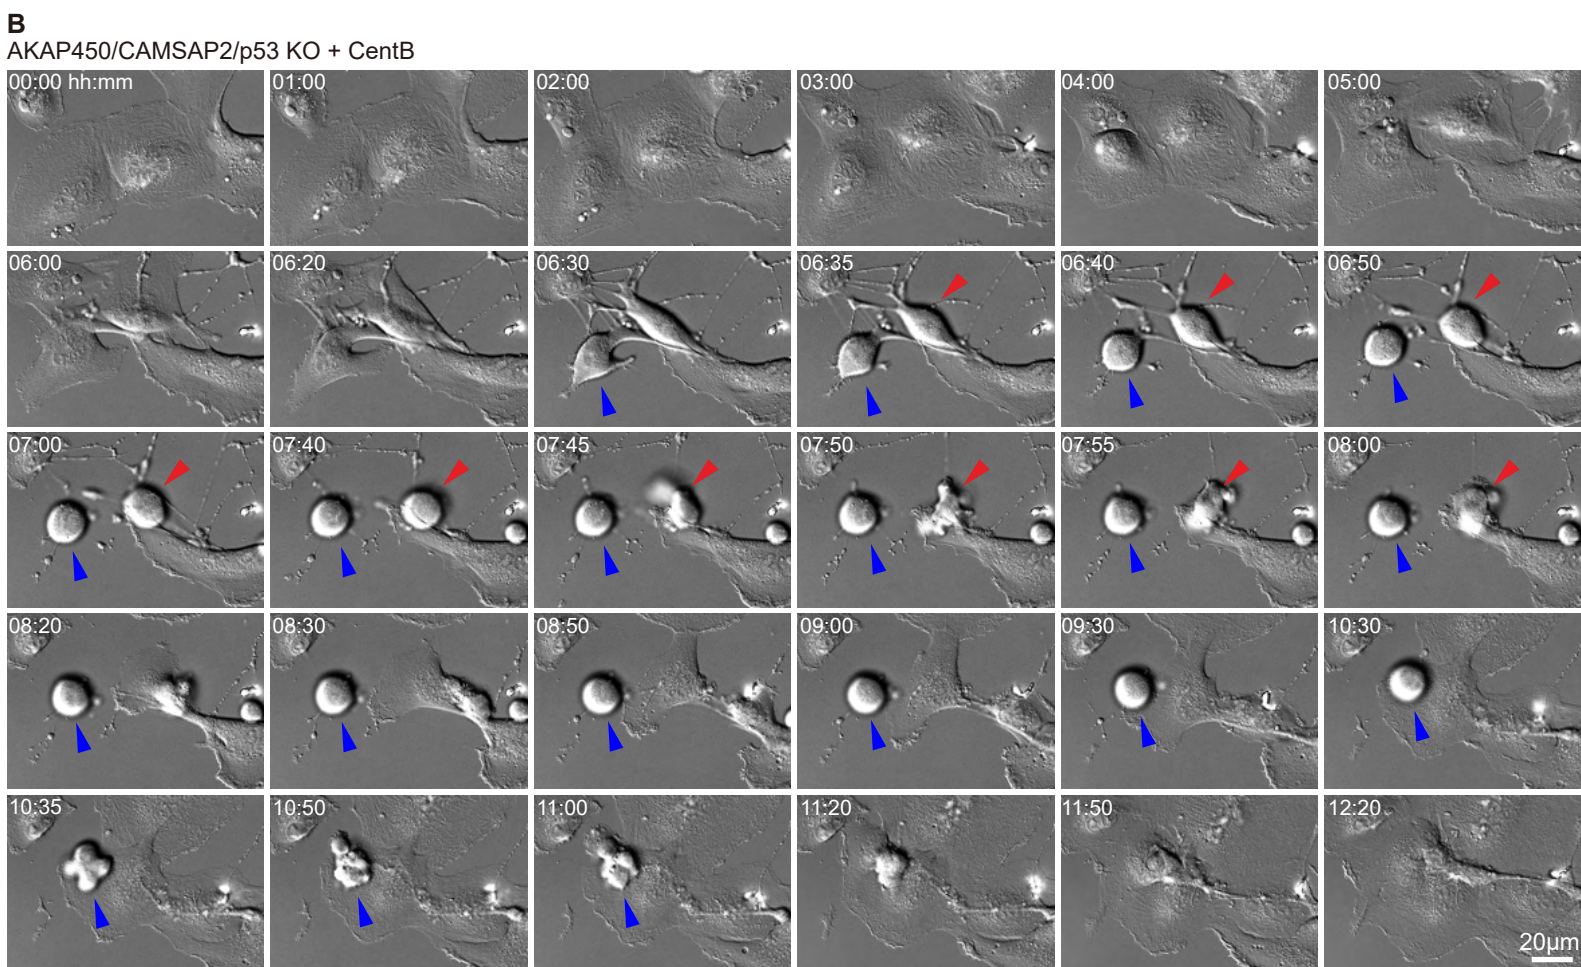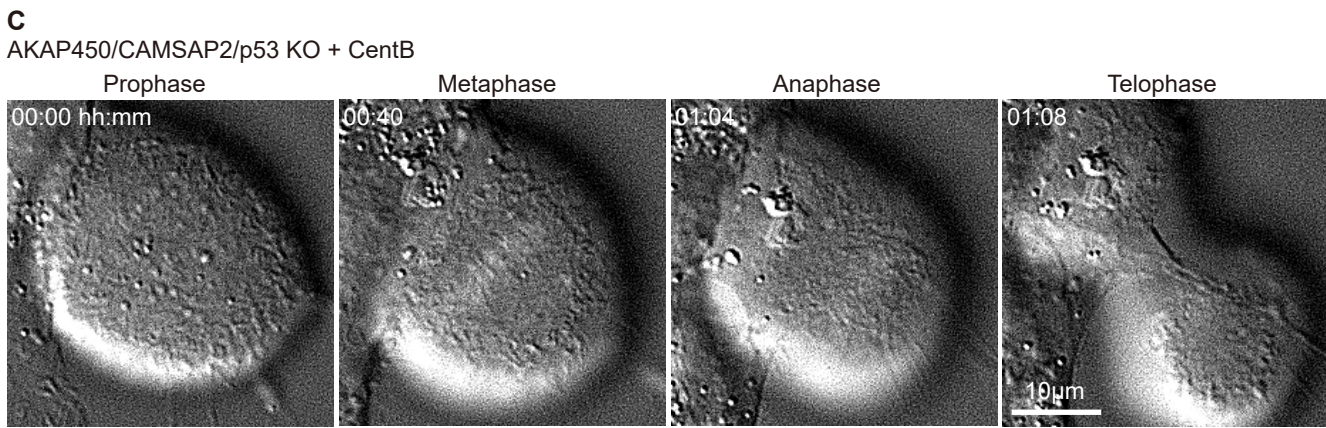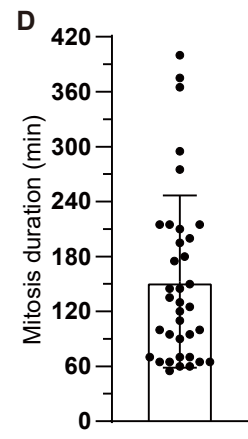

Figure 2 - figure supplement 4

**A** Control=AKAP450/CAMSAP2/p53 KO + CentB

PCNT KO=AKAP450/CAMSAP2/p53/PCNT KO + CentB

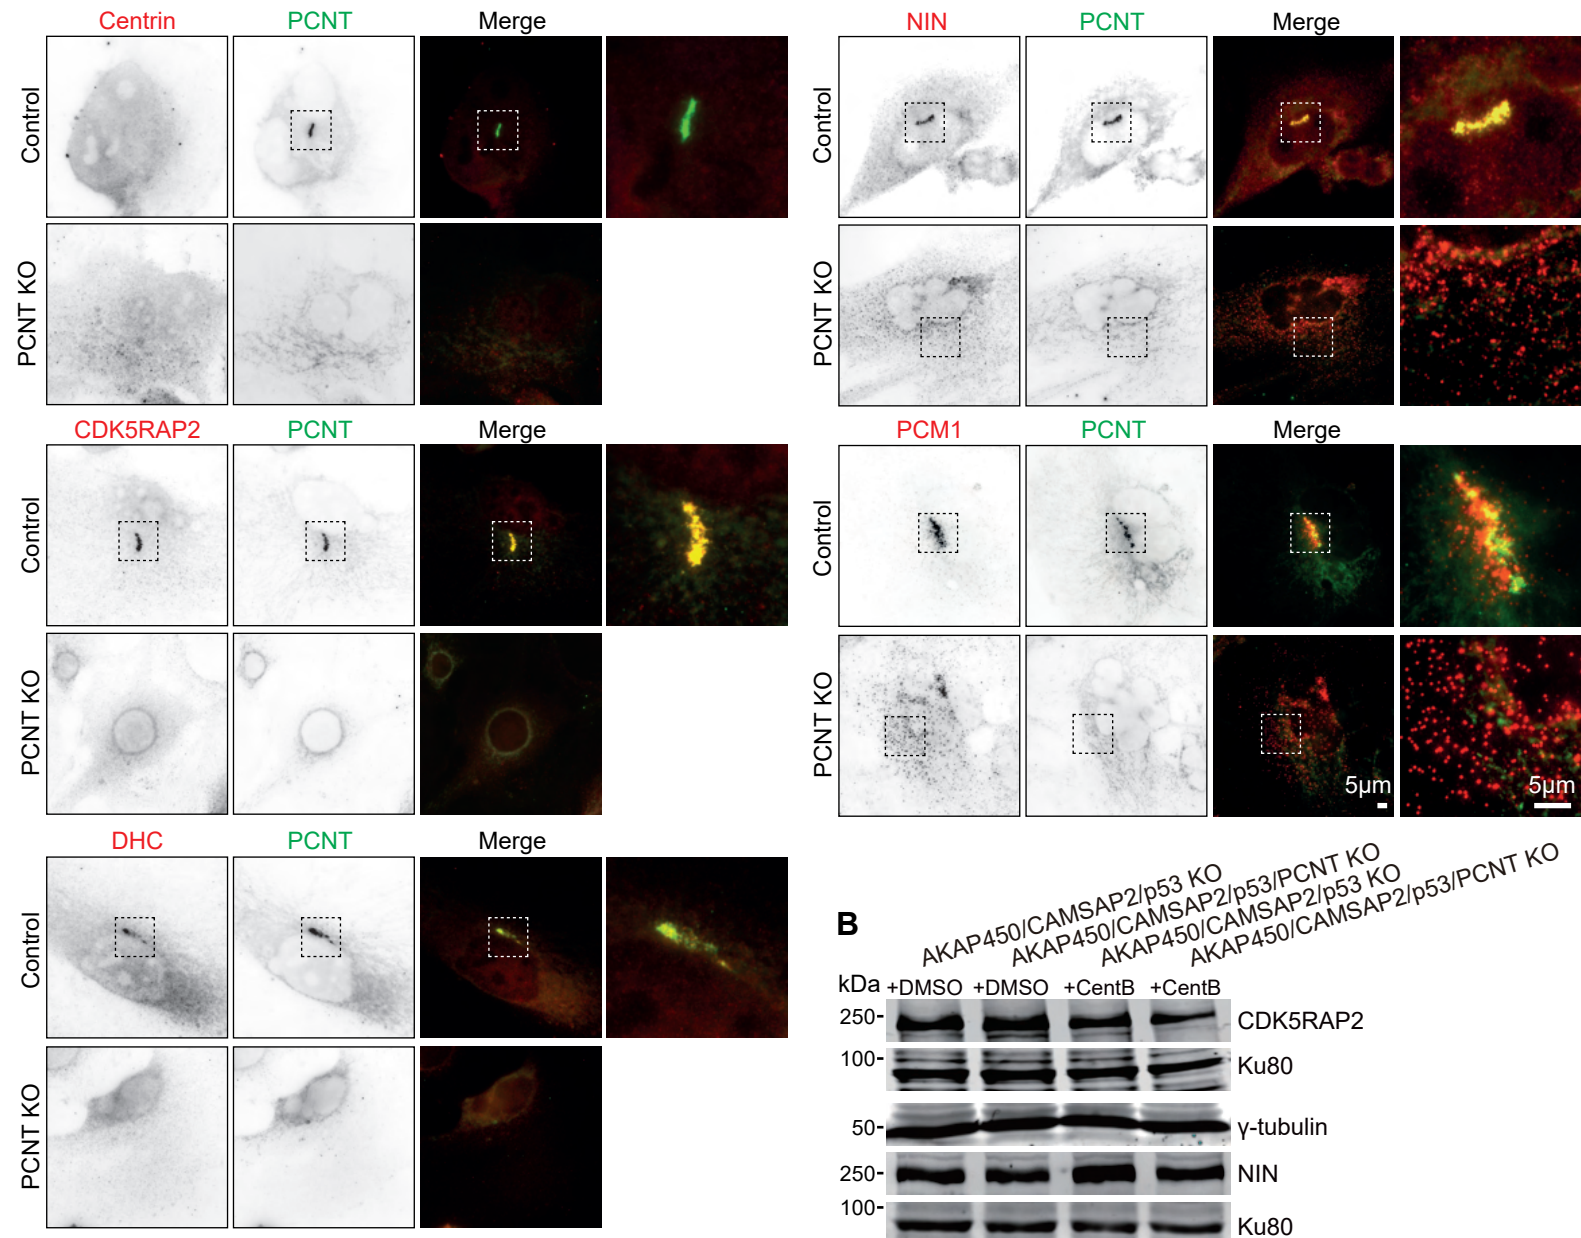

Figure 2 - Figure supplement 5

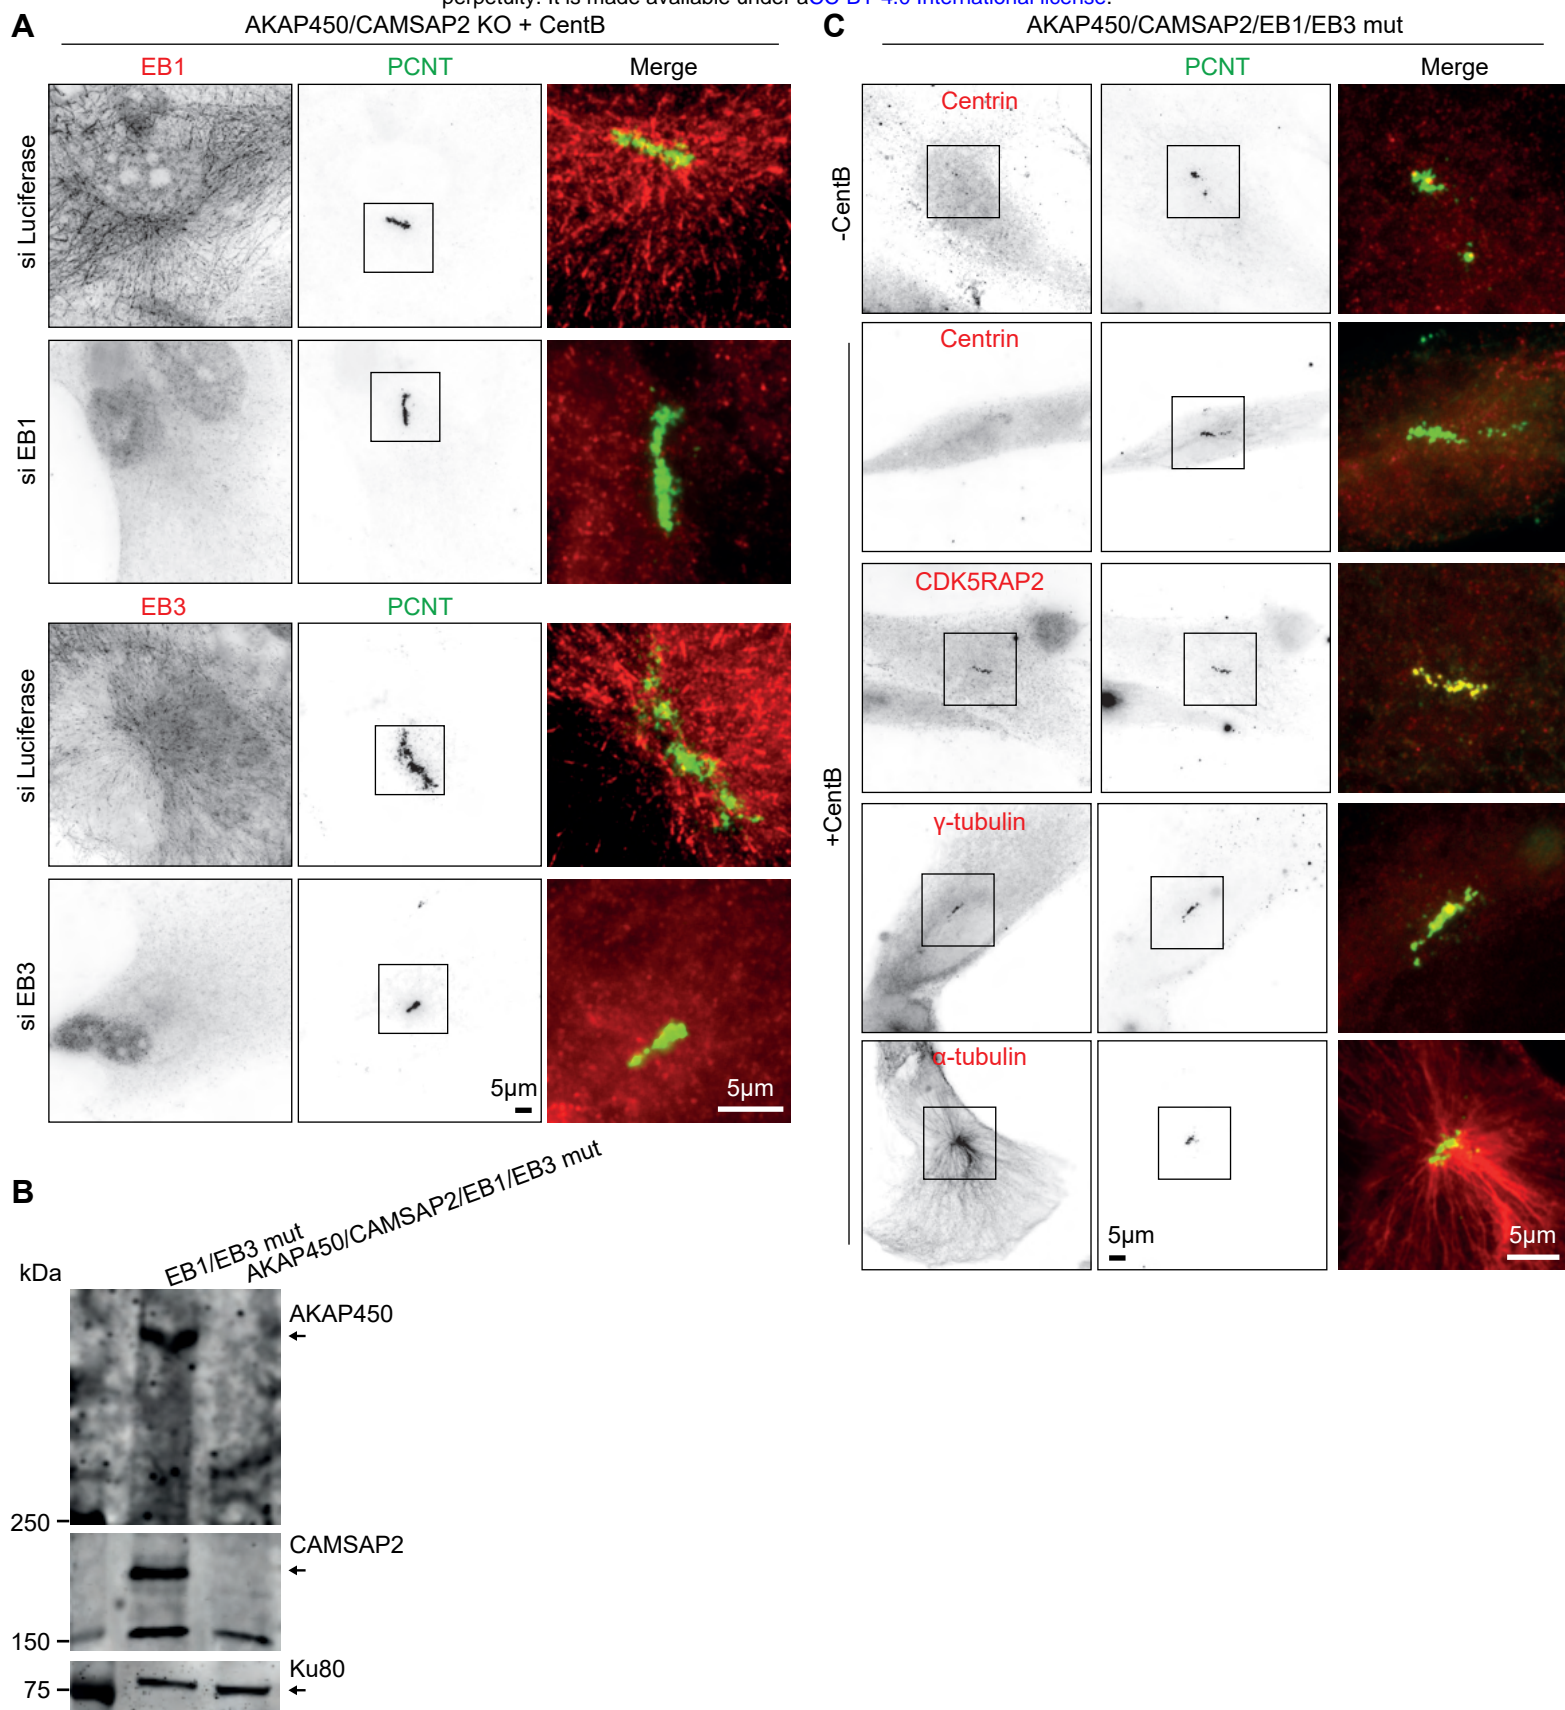

**A** AKAP450/CAMSAP2 KO stable GFP-CentB

Noco treatment

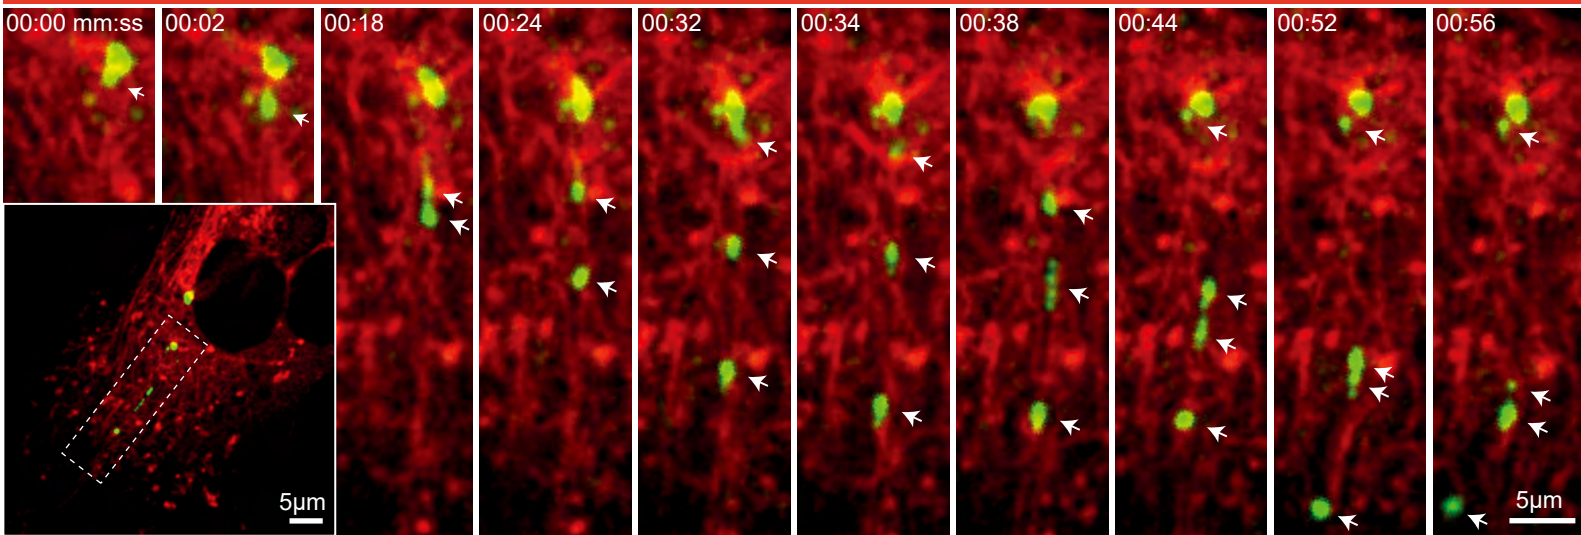

**B** AKAP450/CAMSAP2 KO + CentB

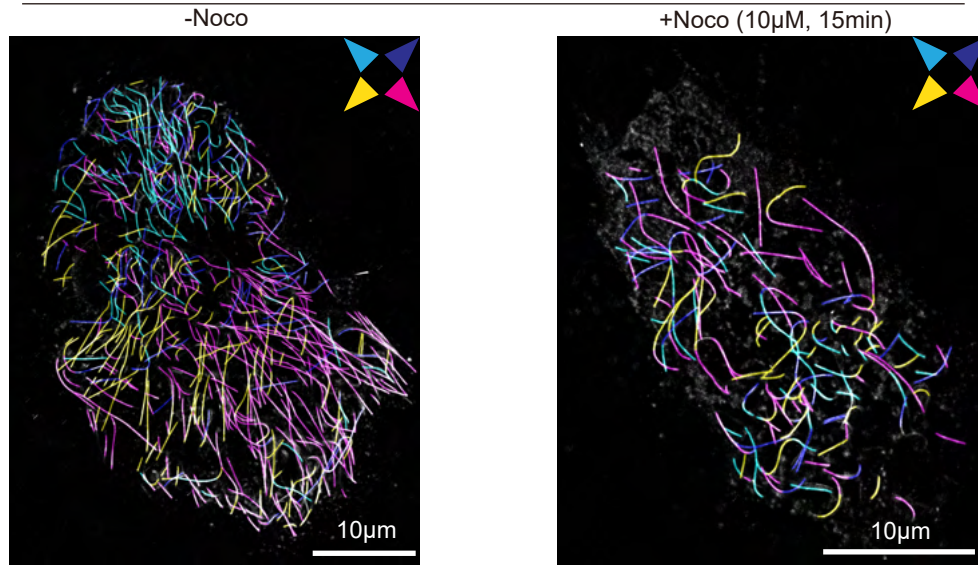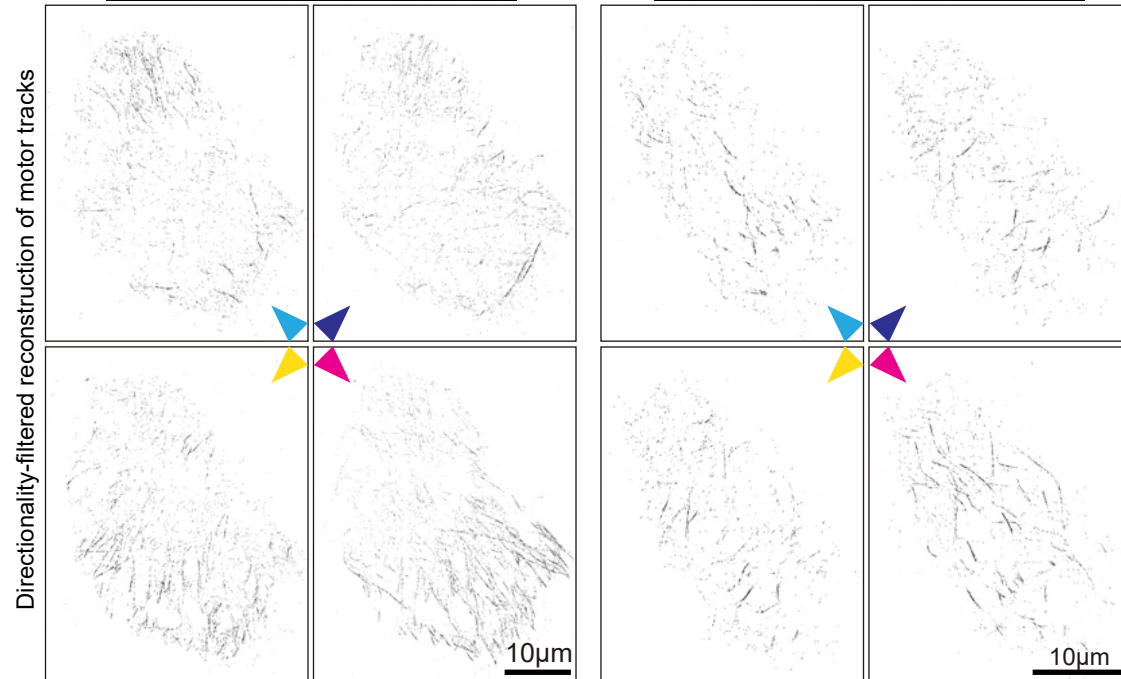

**C** AKAP450/CAMSAP2 KO + CentB, Cold treatment (30min 4°C)

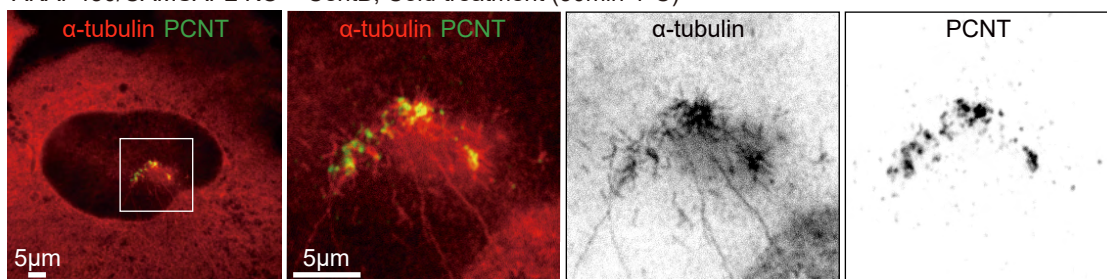

# Figure 5-figure supplement 1

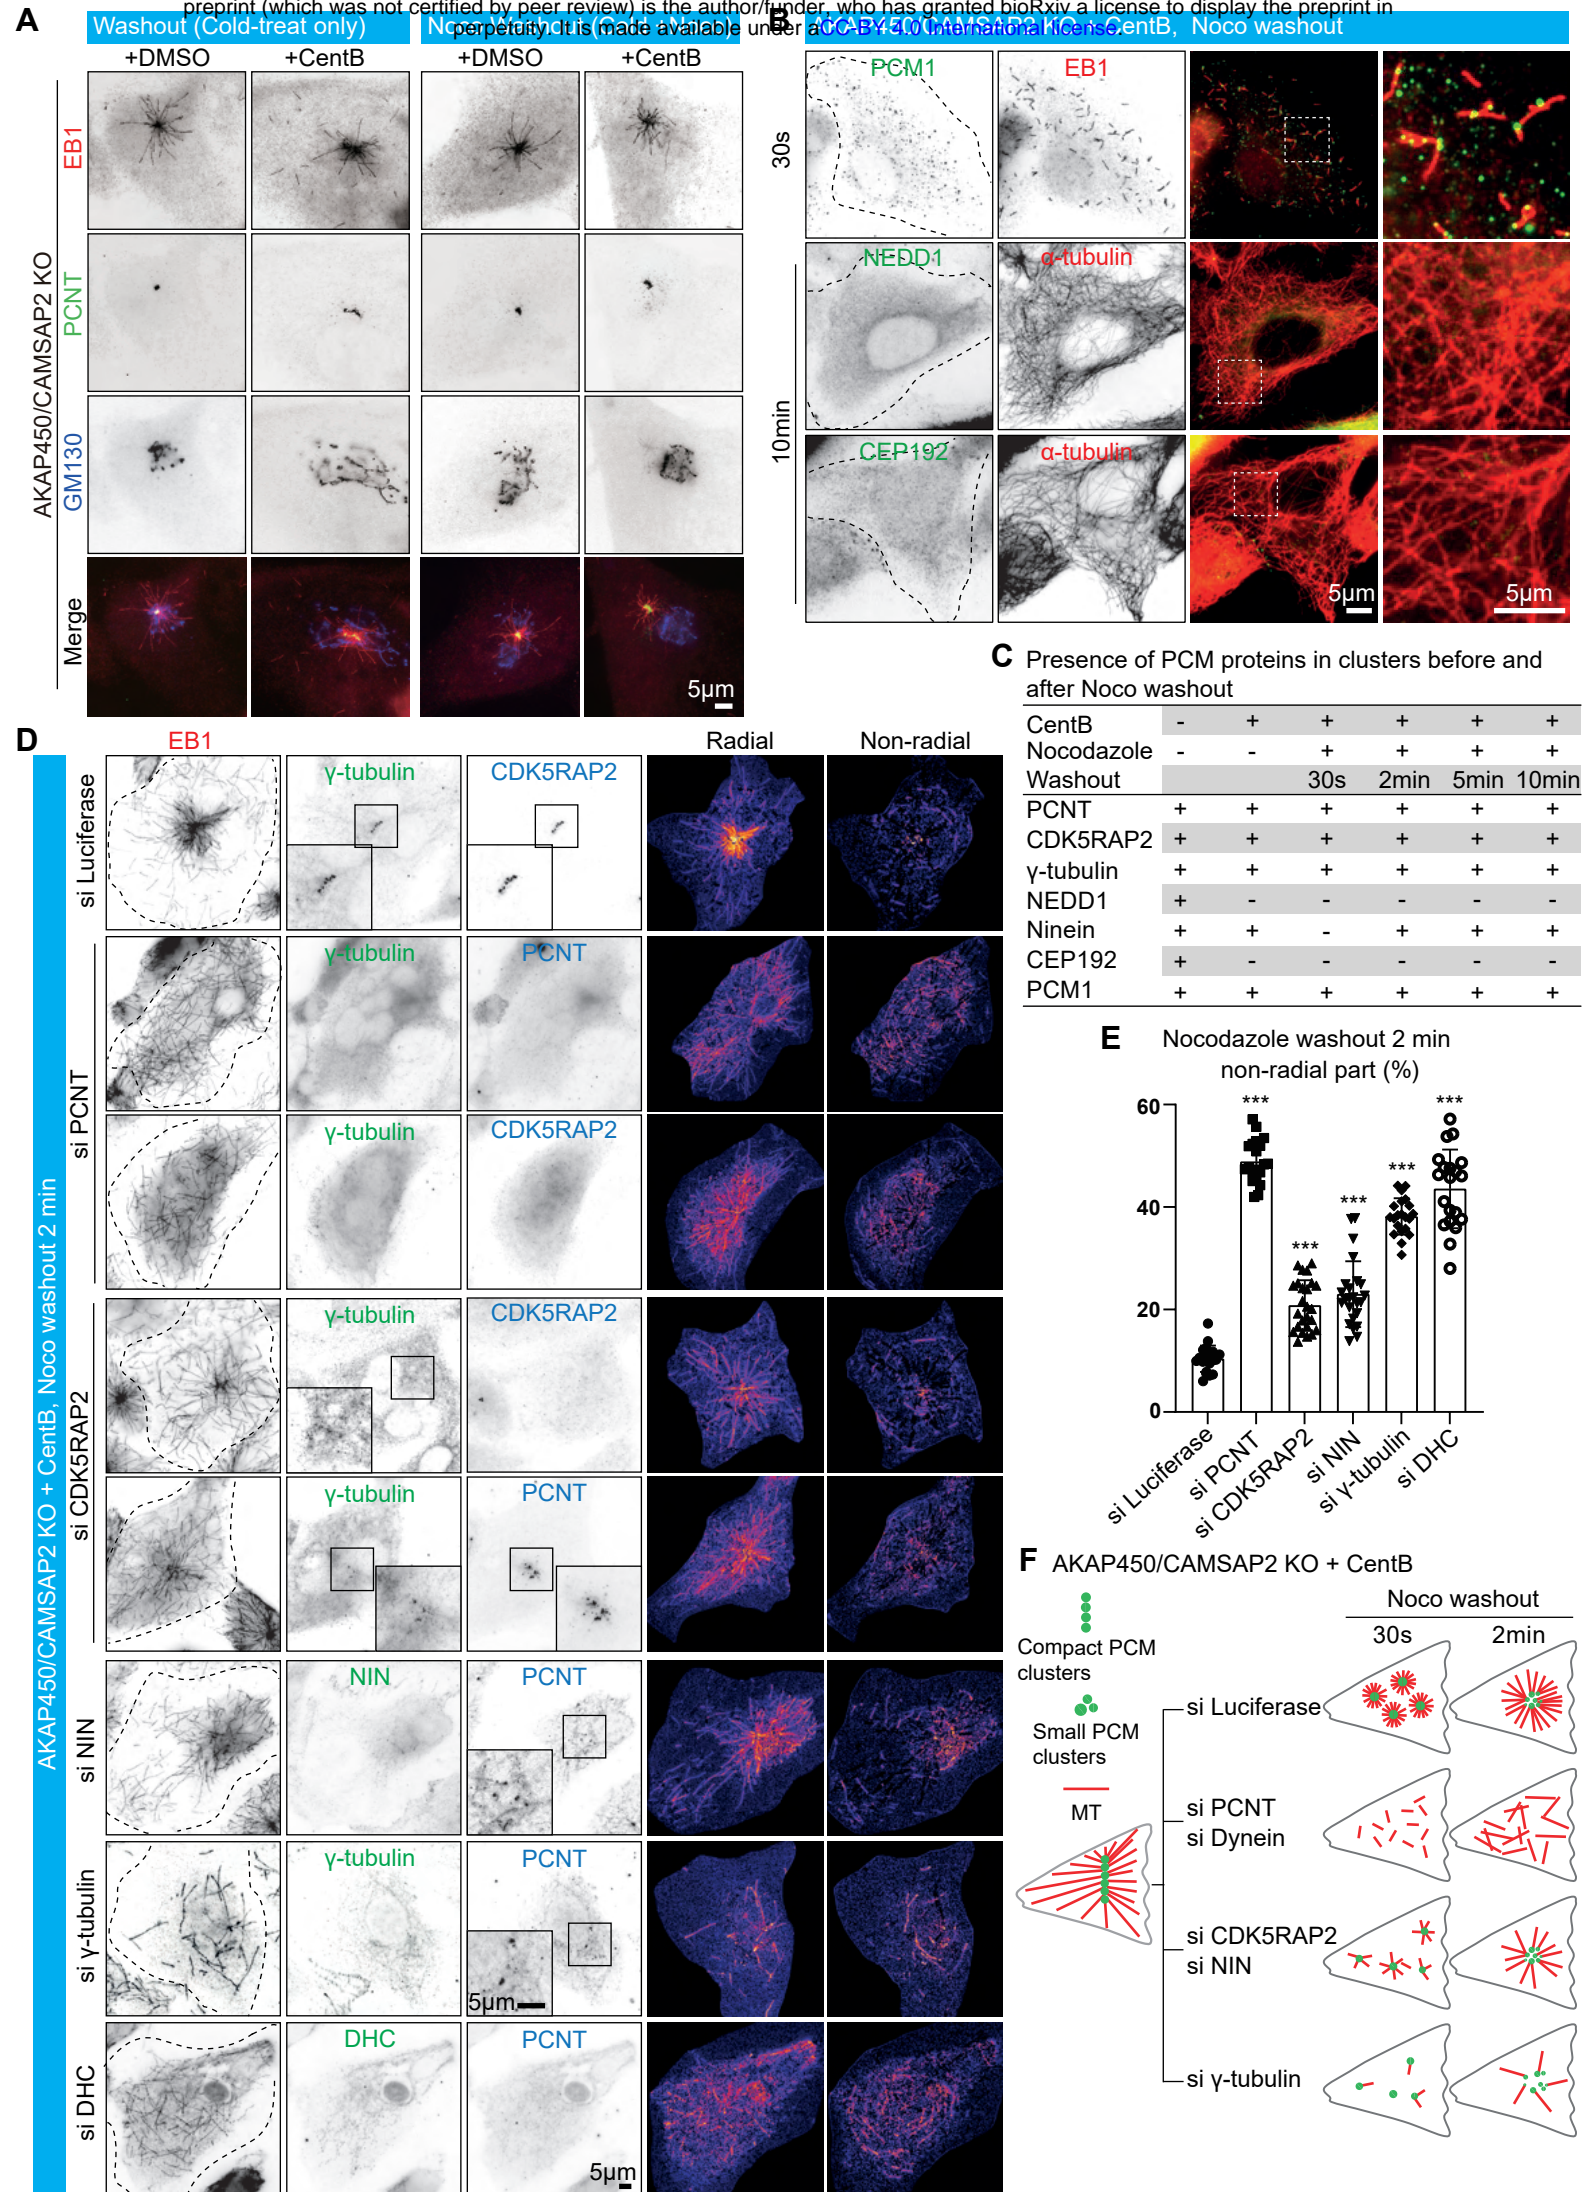



Figure 5 - Figure supplement 2

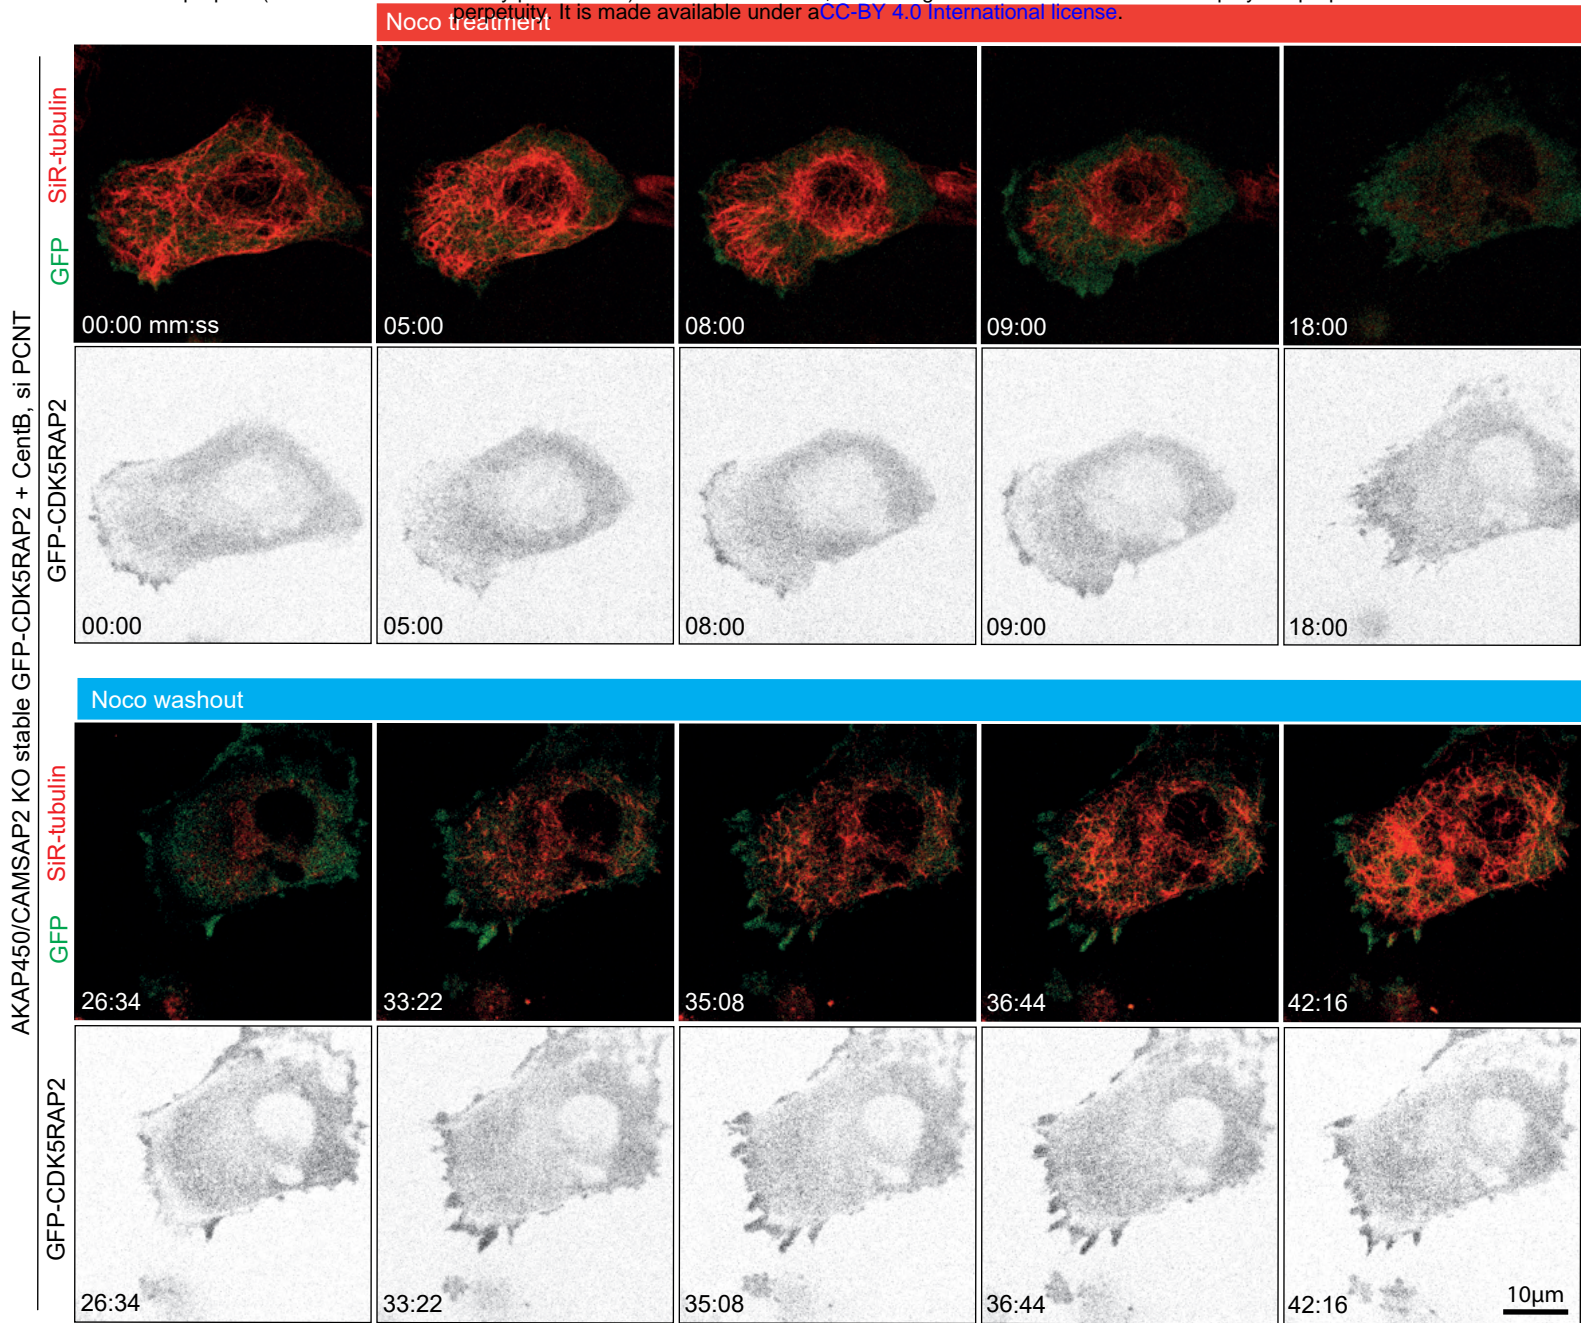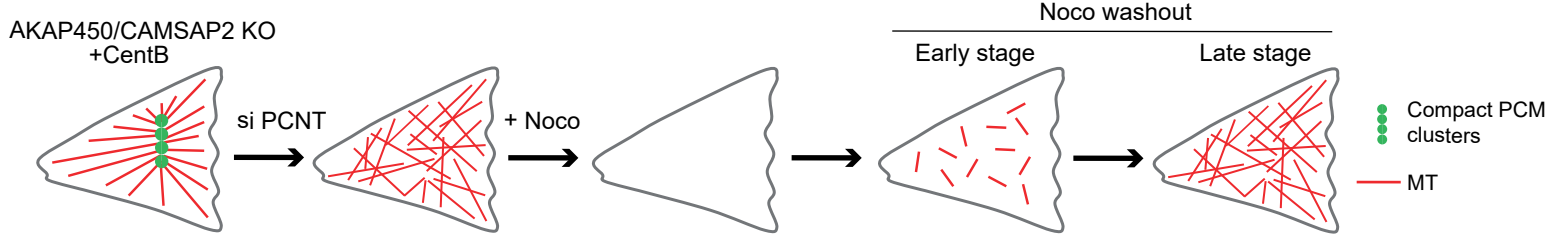

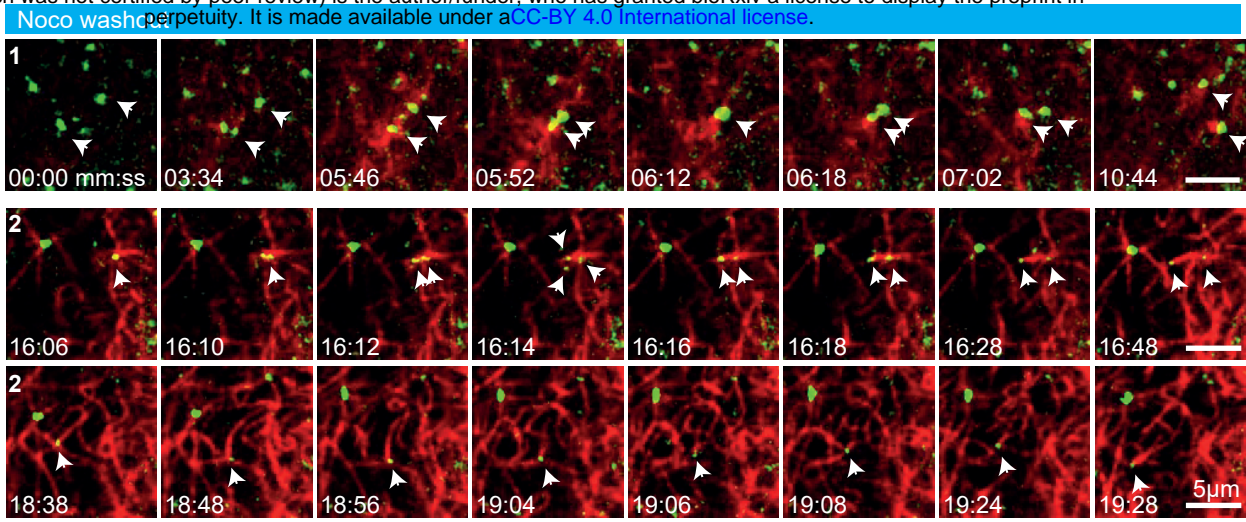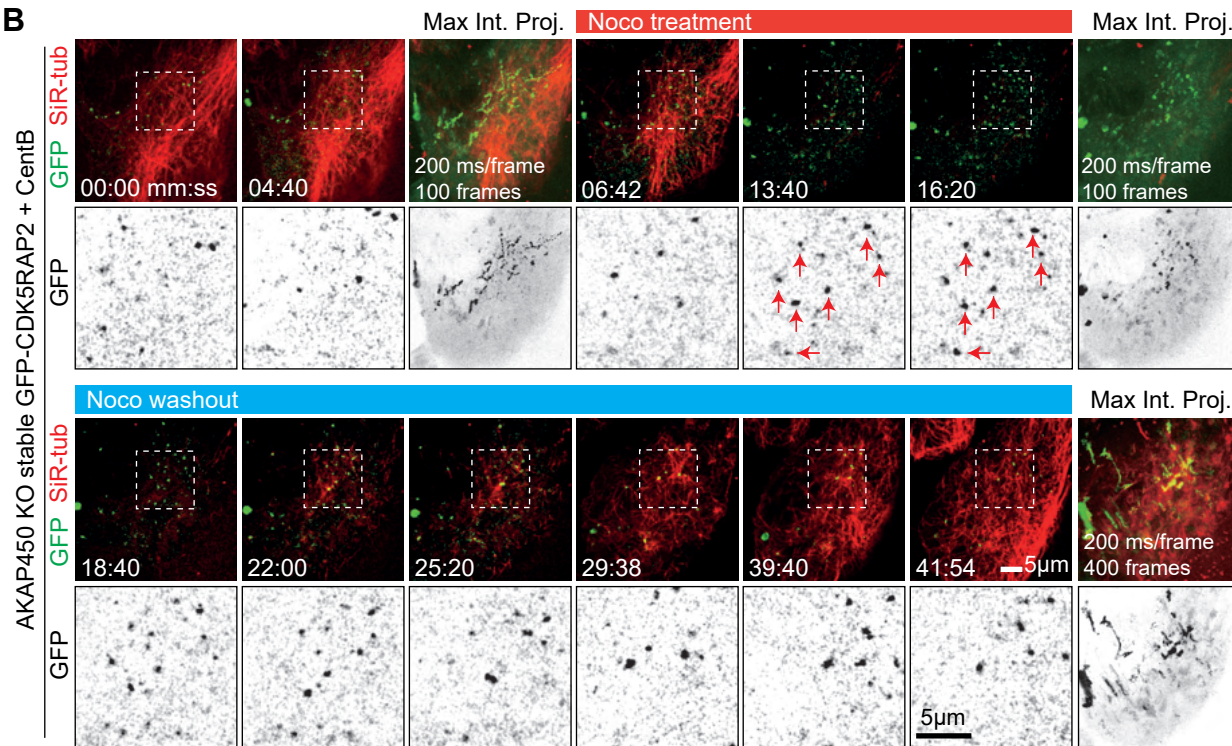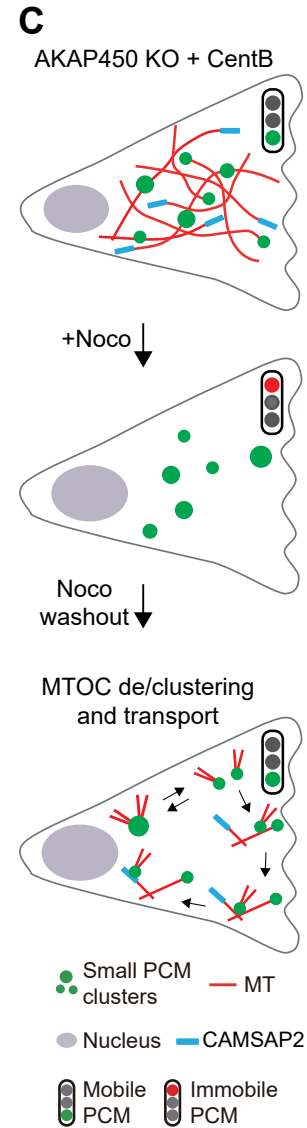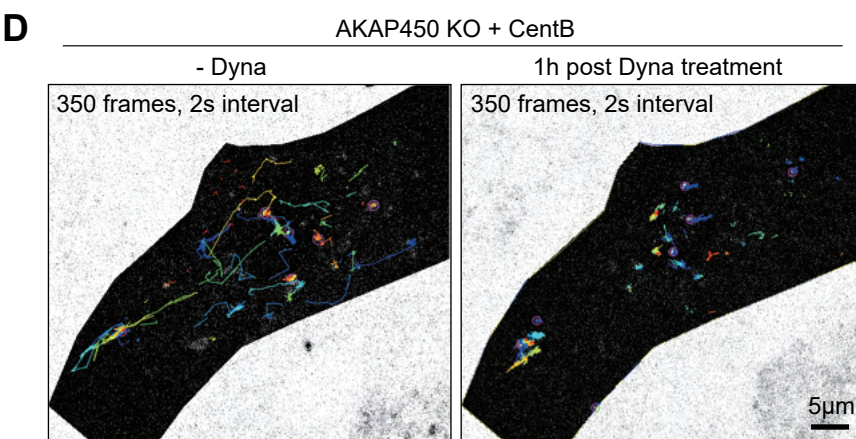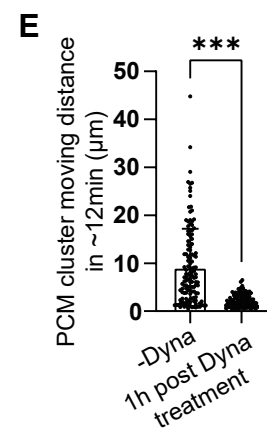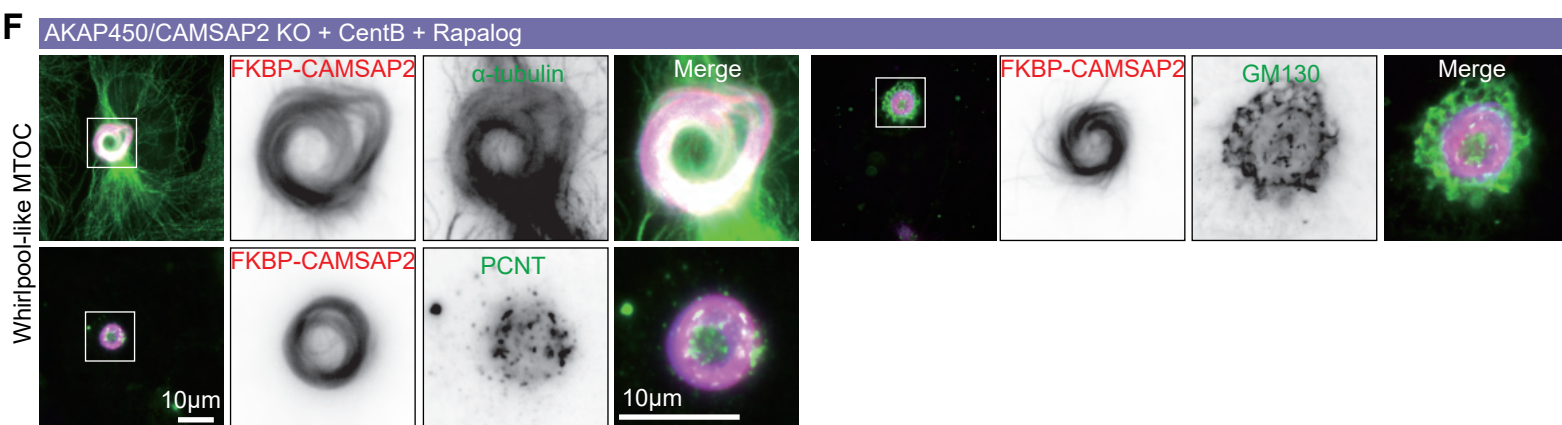

Figure 8 - figure supplement 2

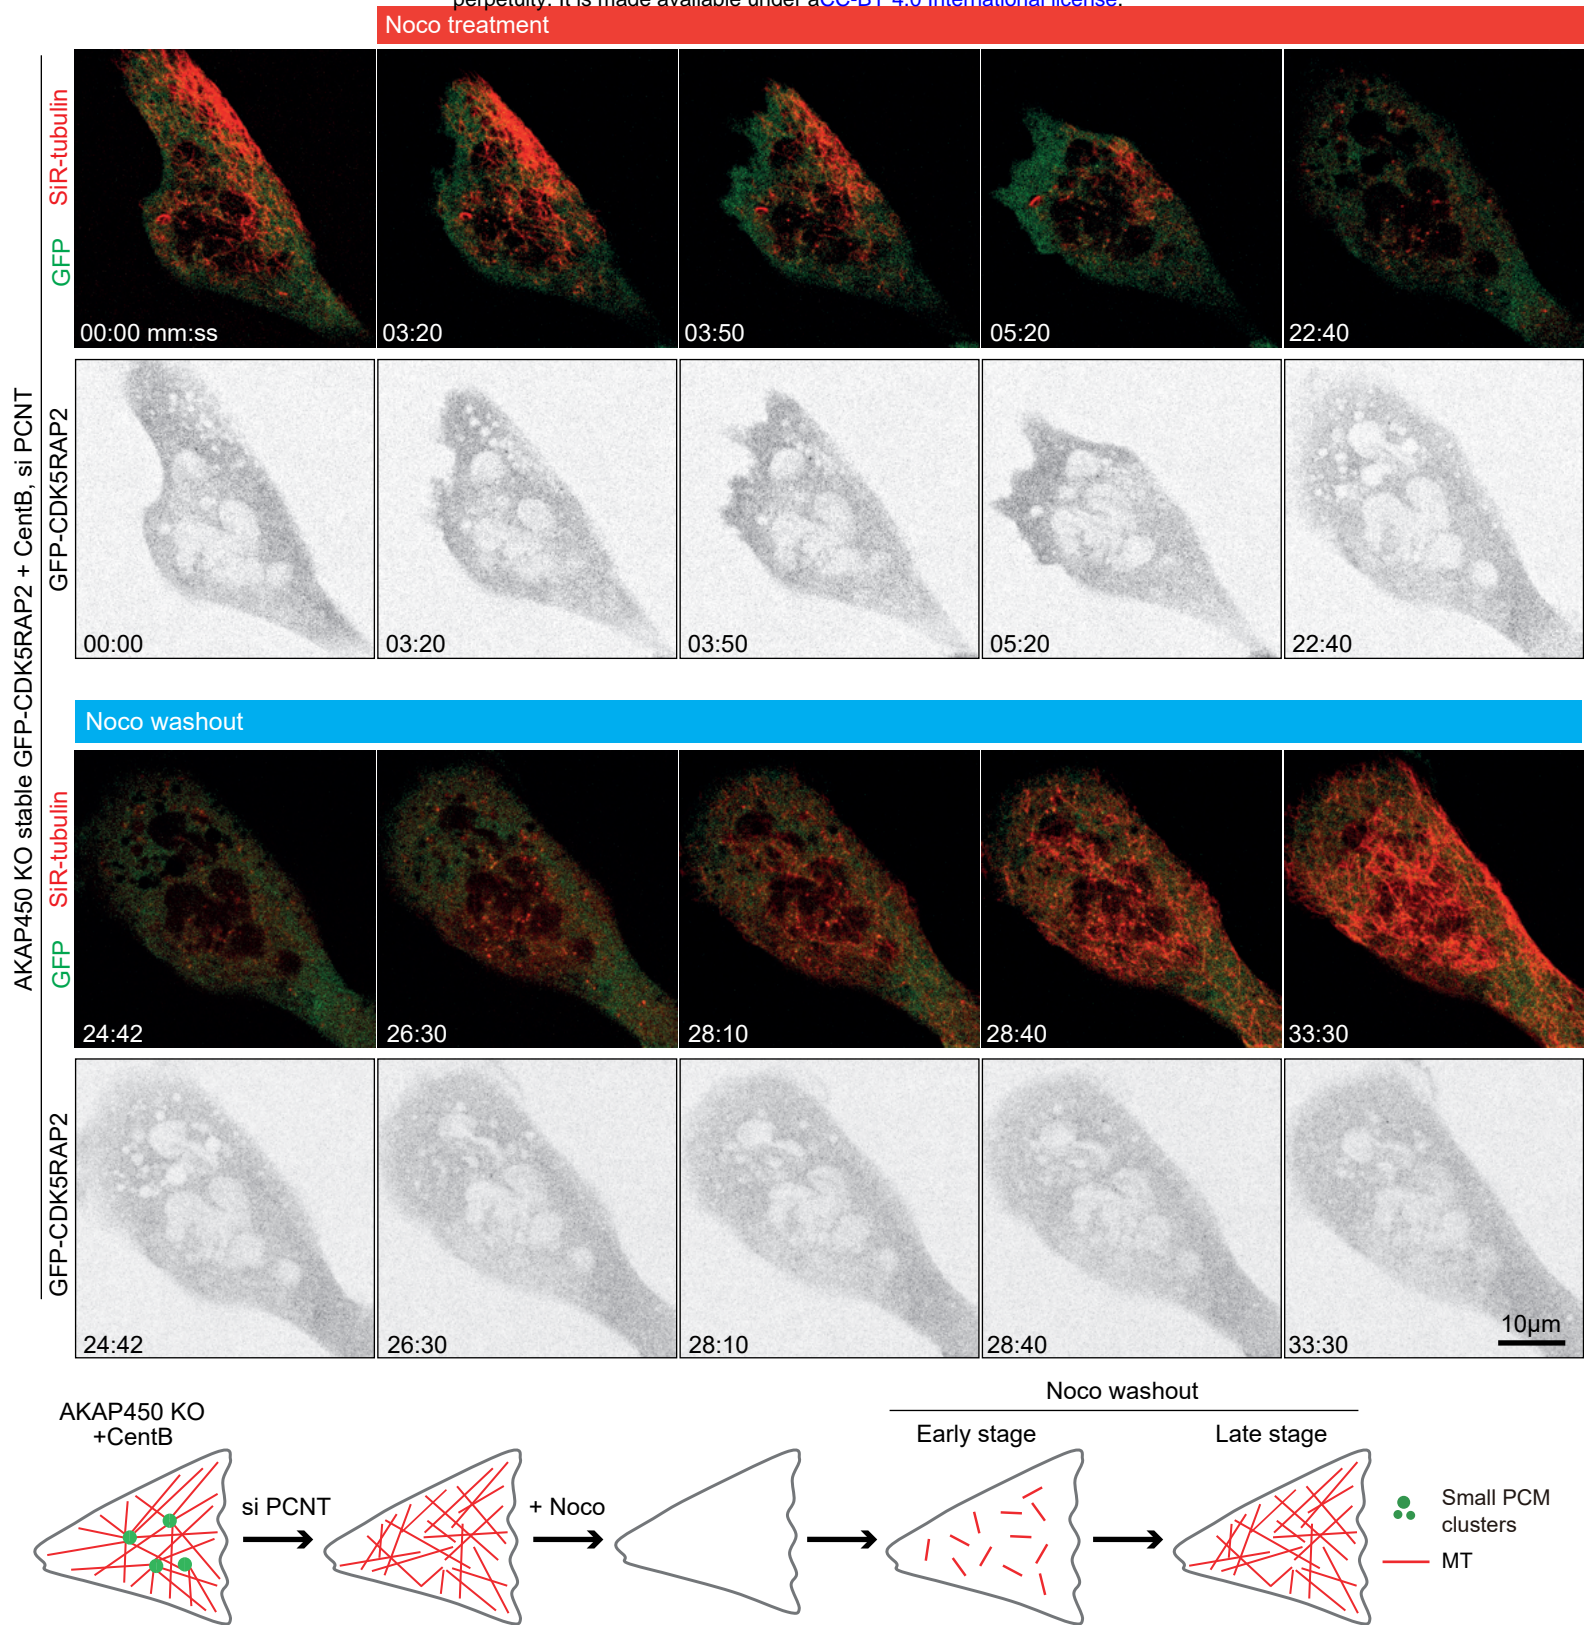

# Figure 7, figure supplement 1

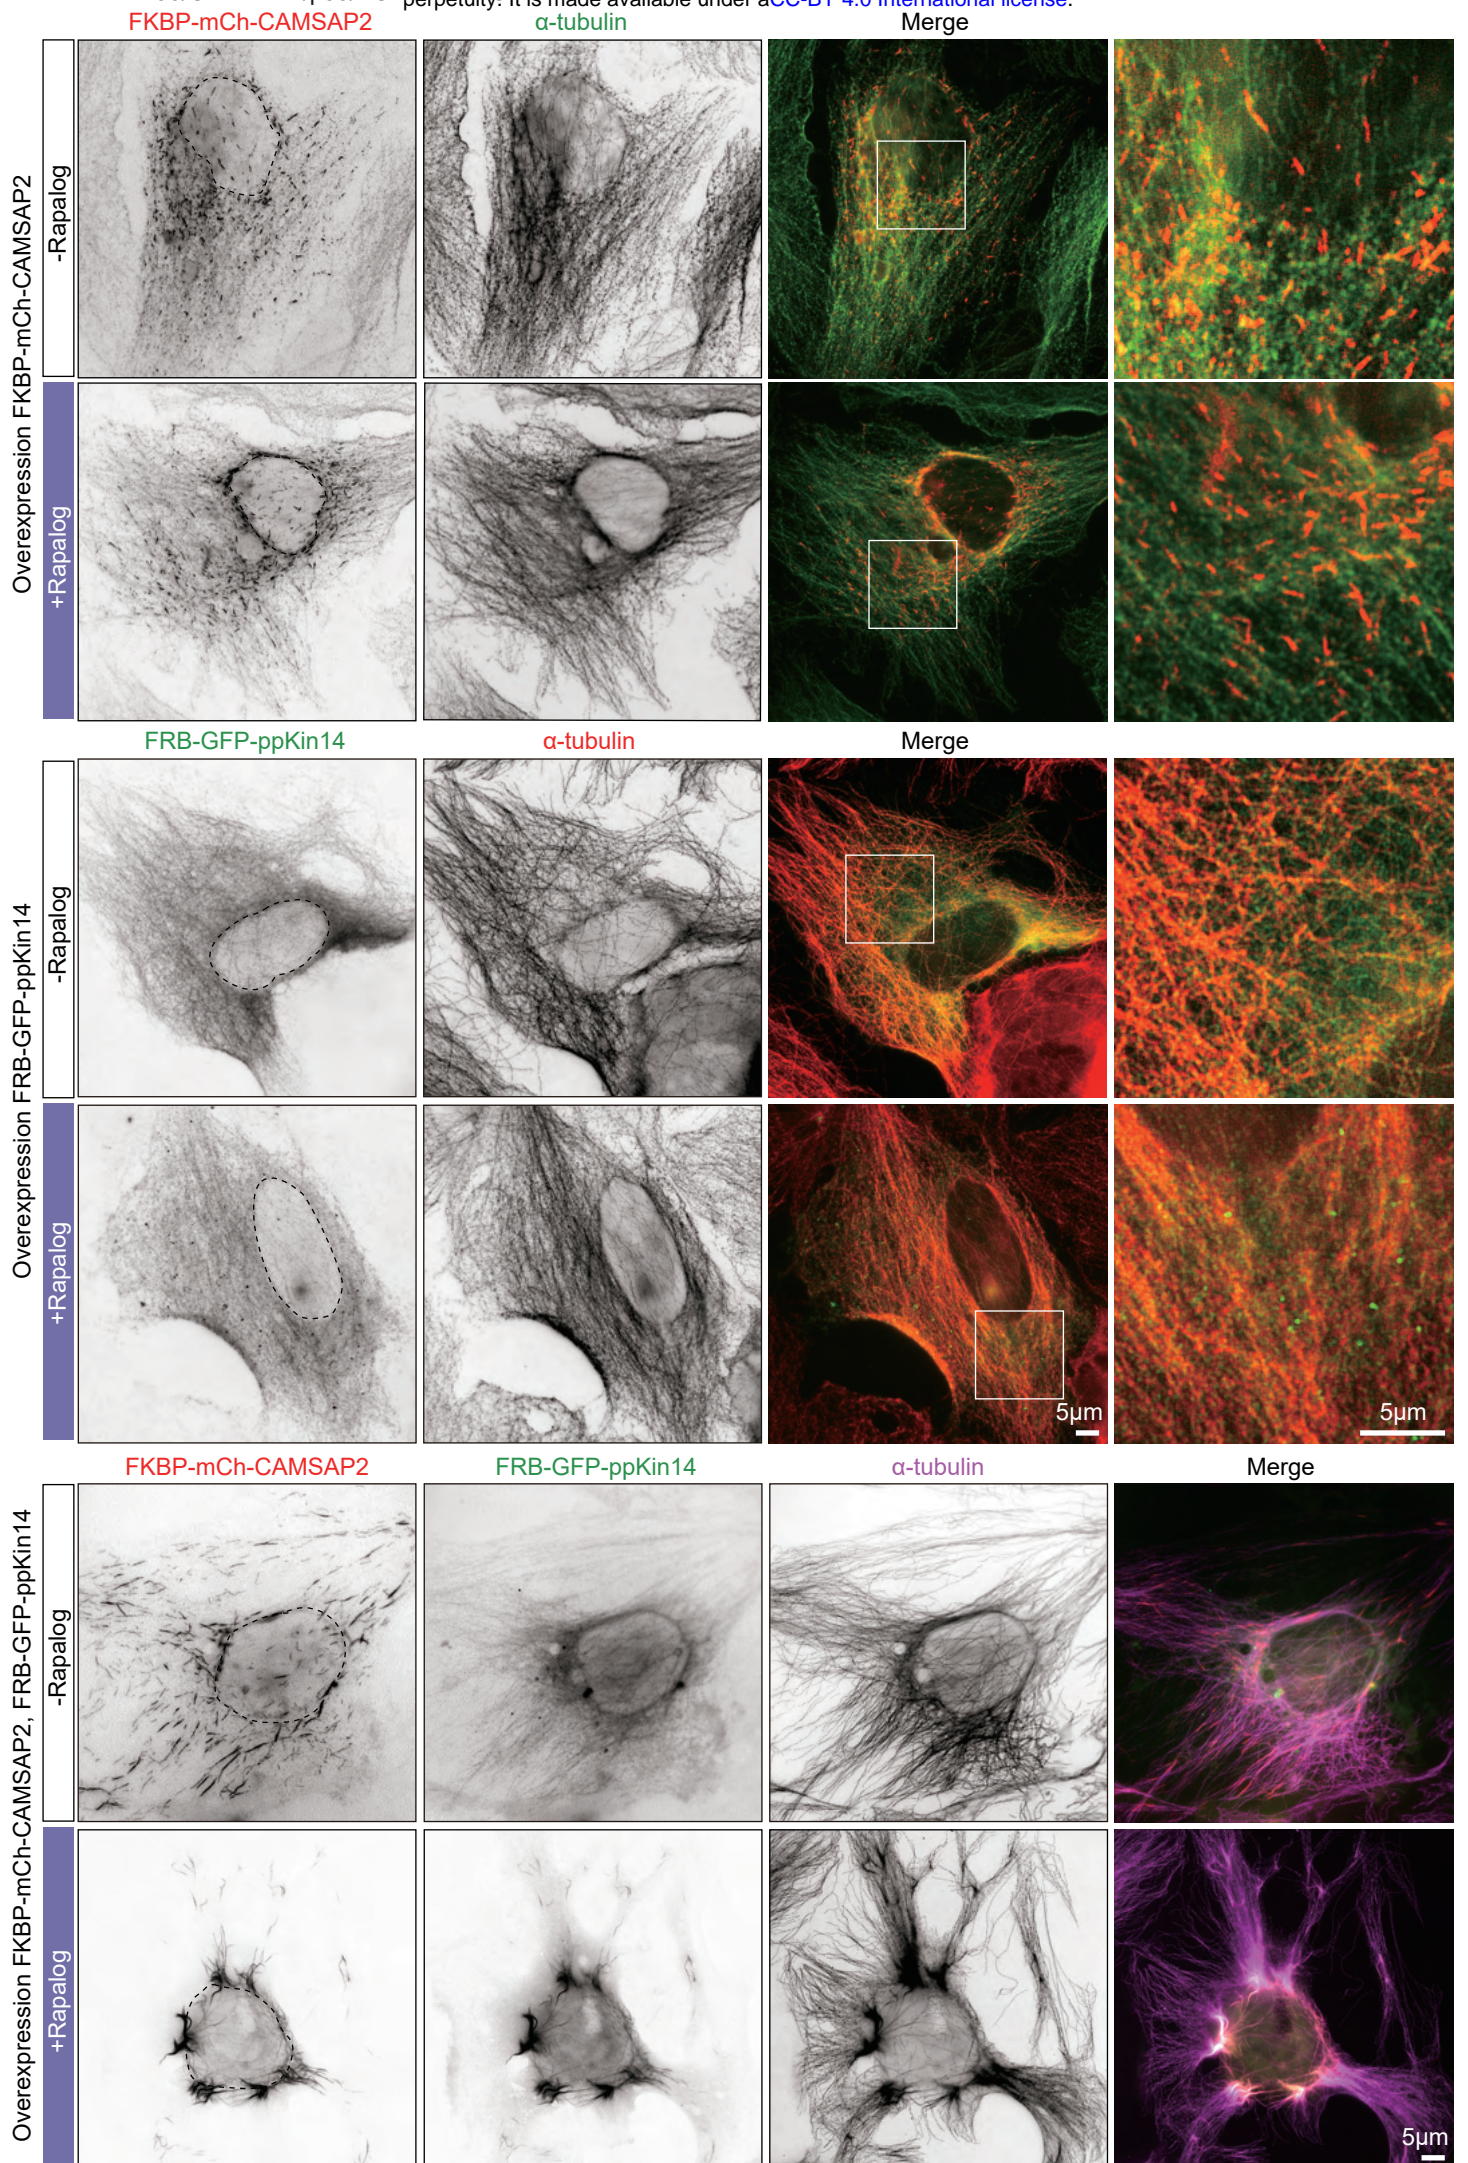

Figure 7-figure supplement 2

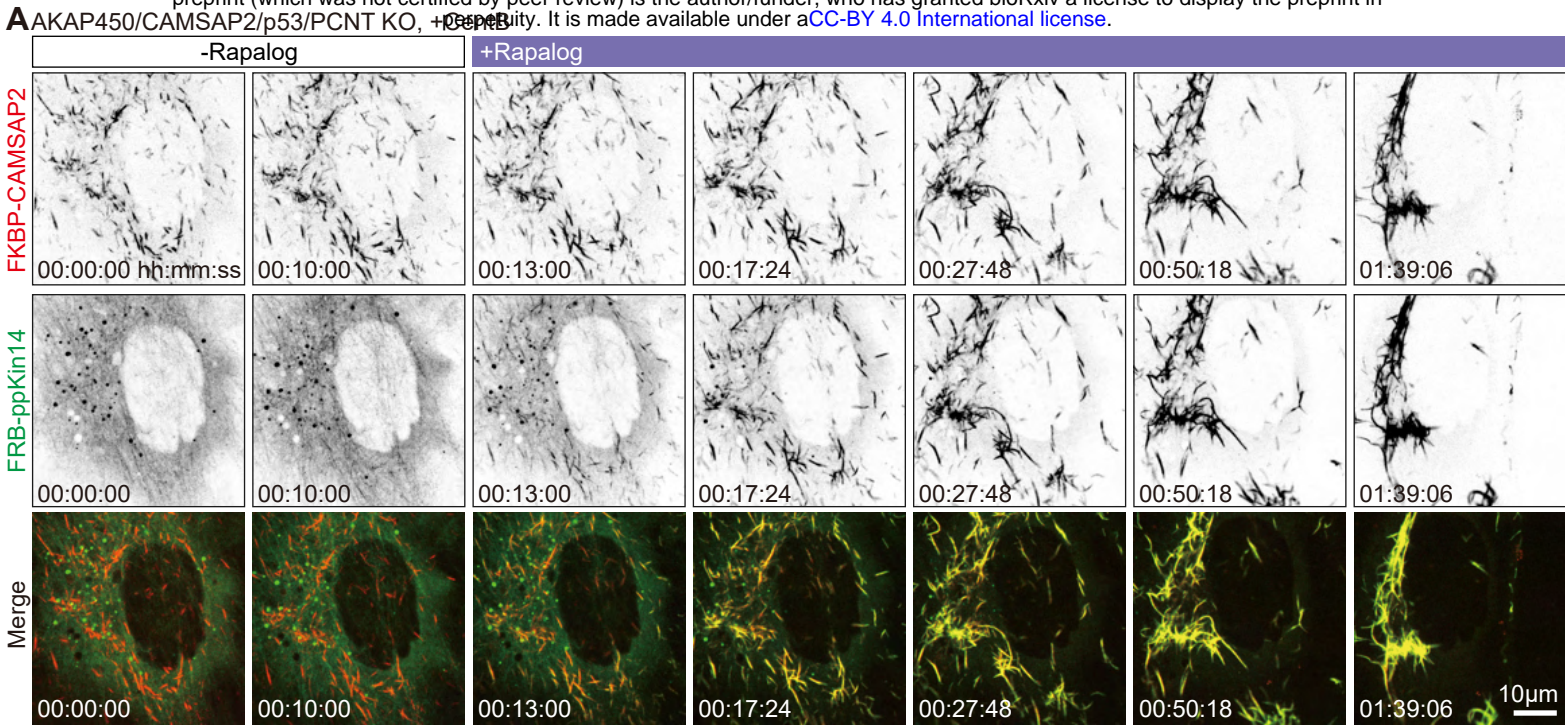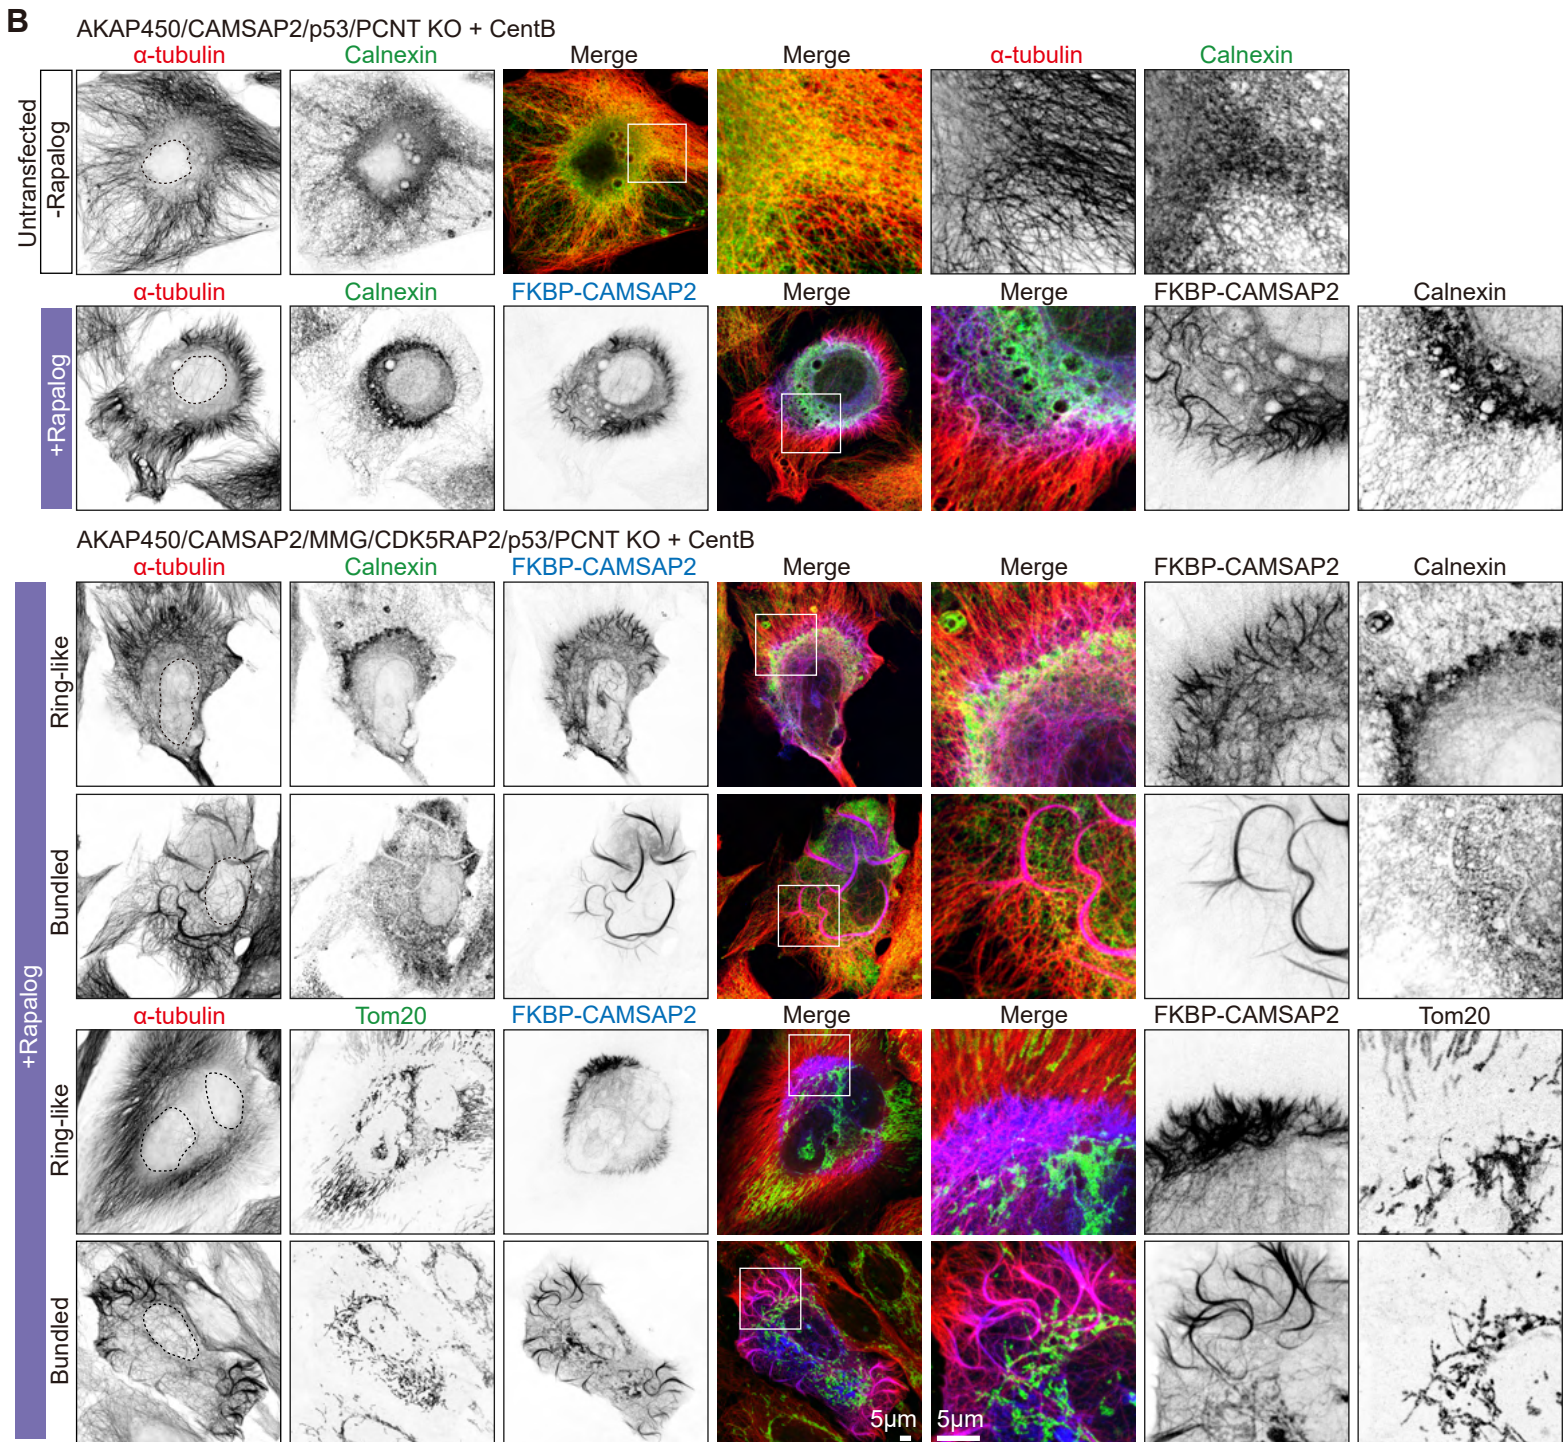

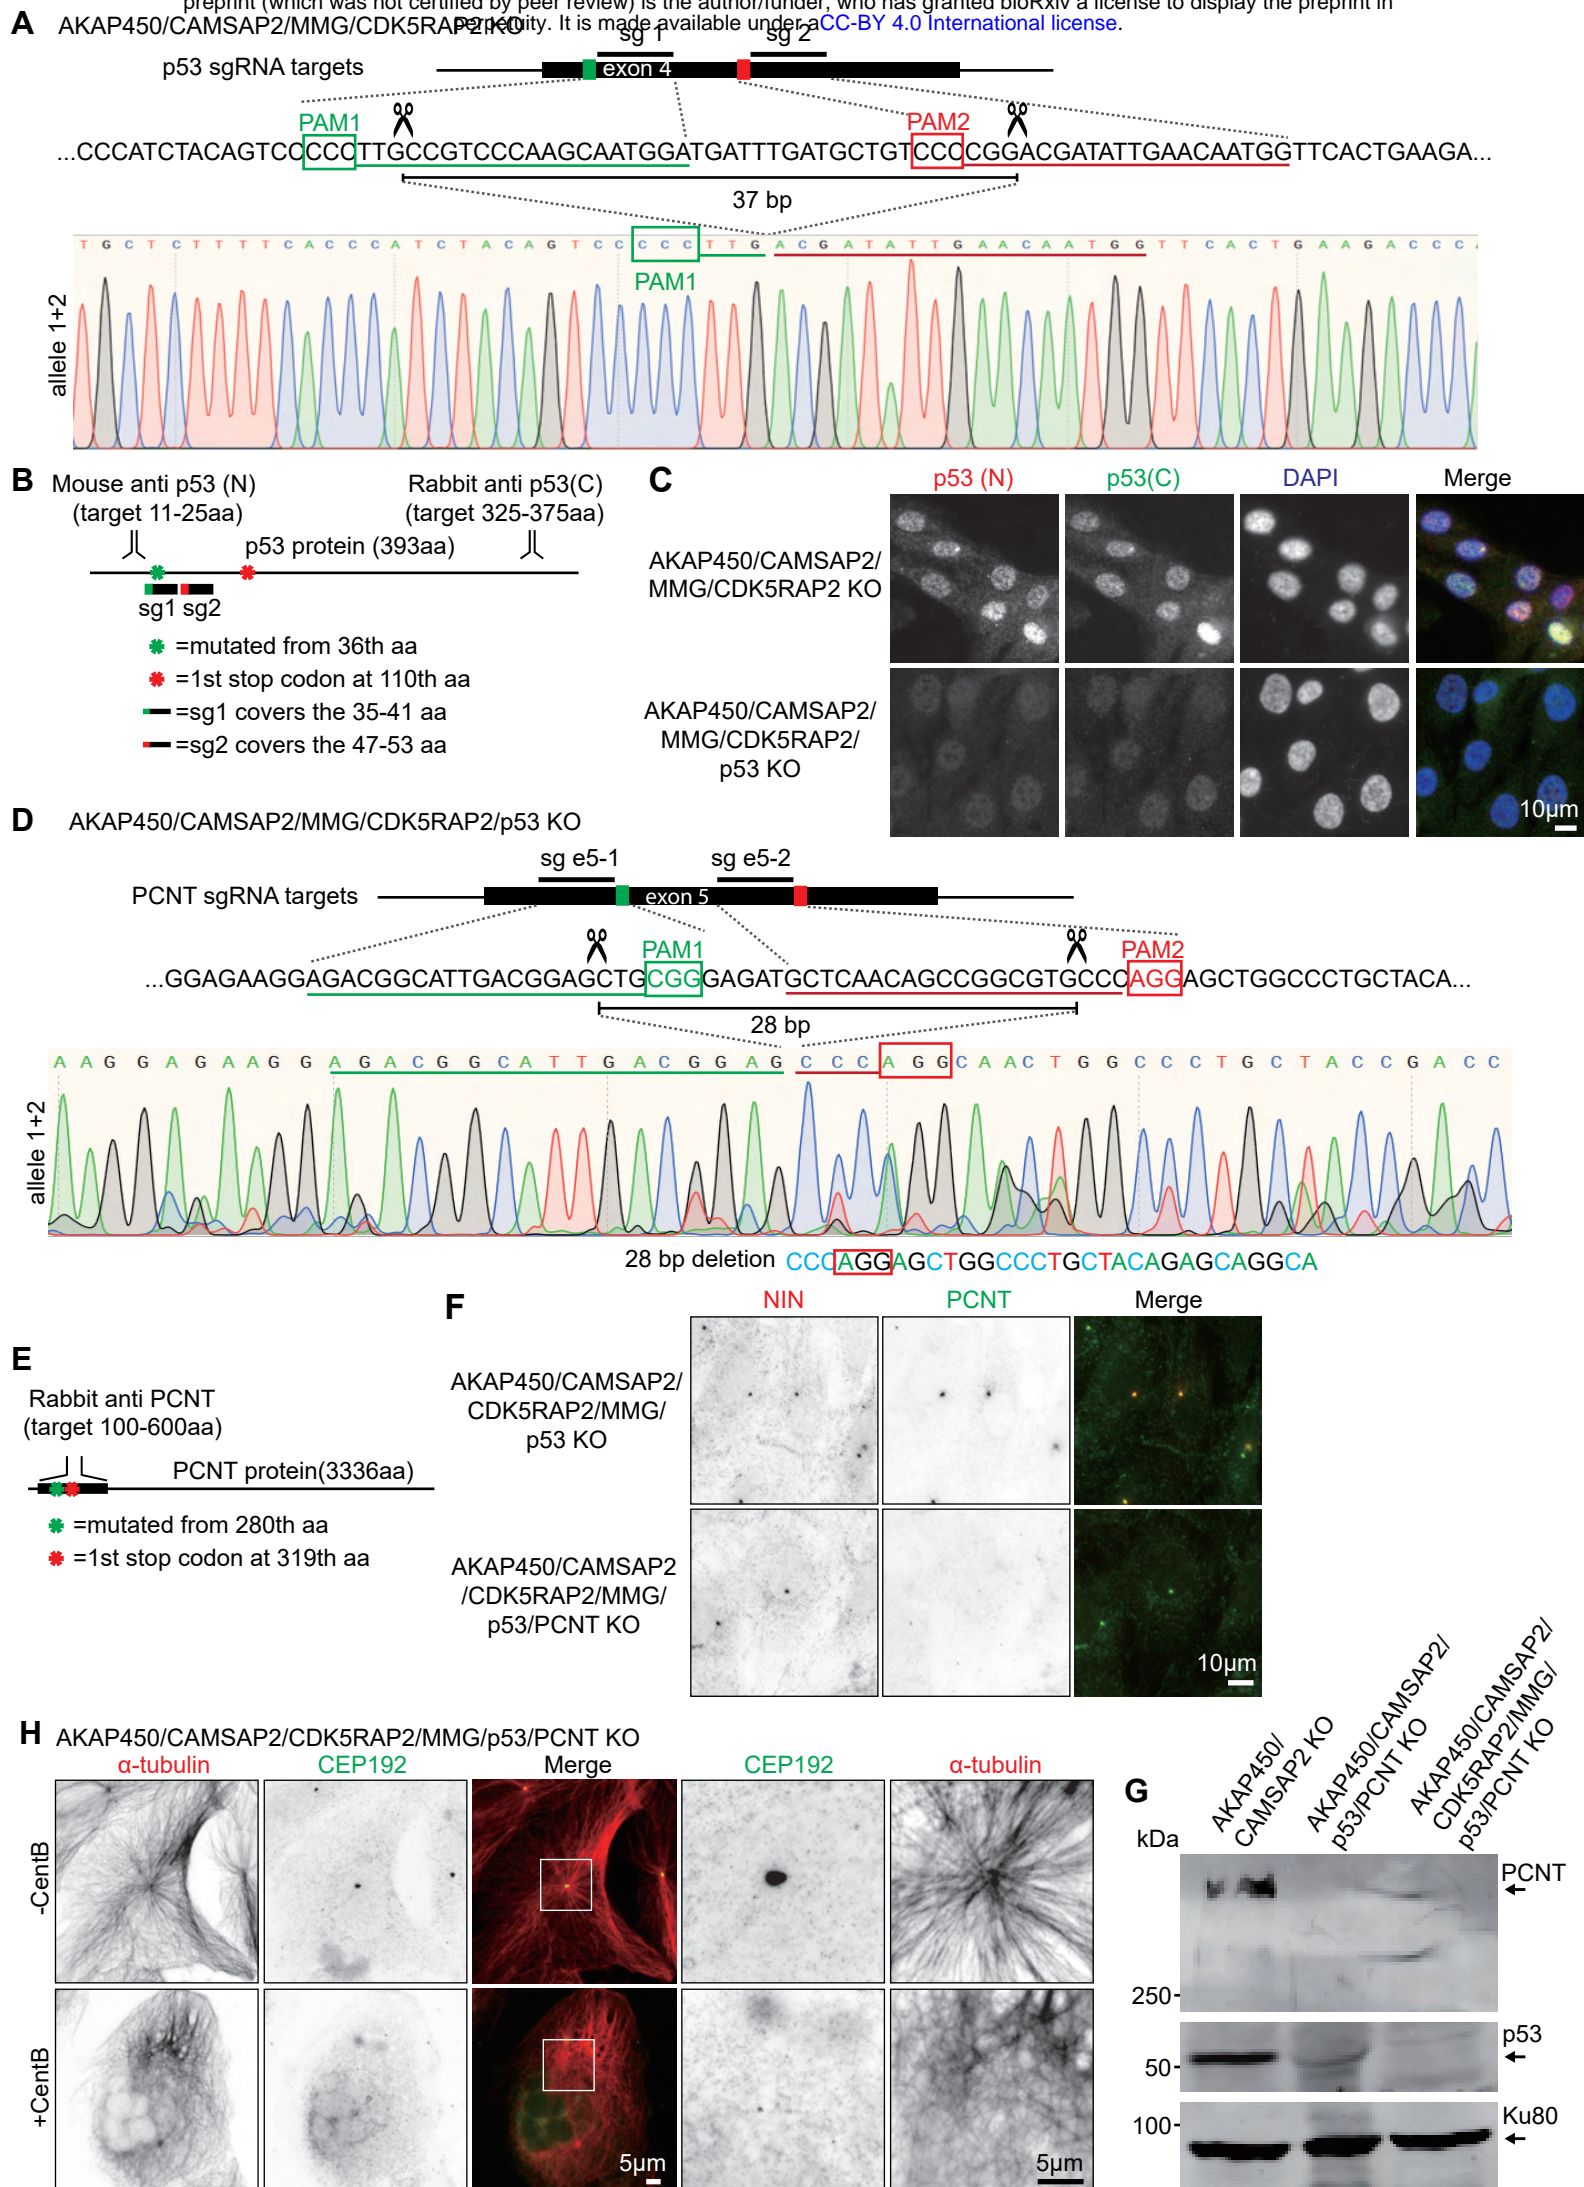

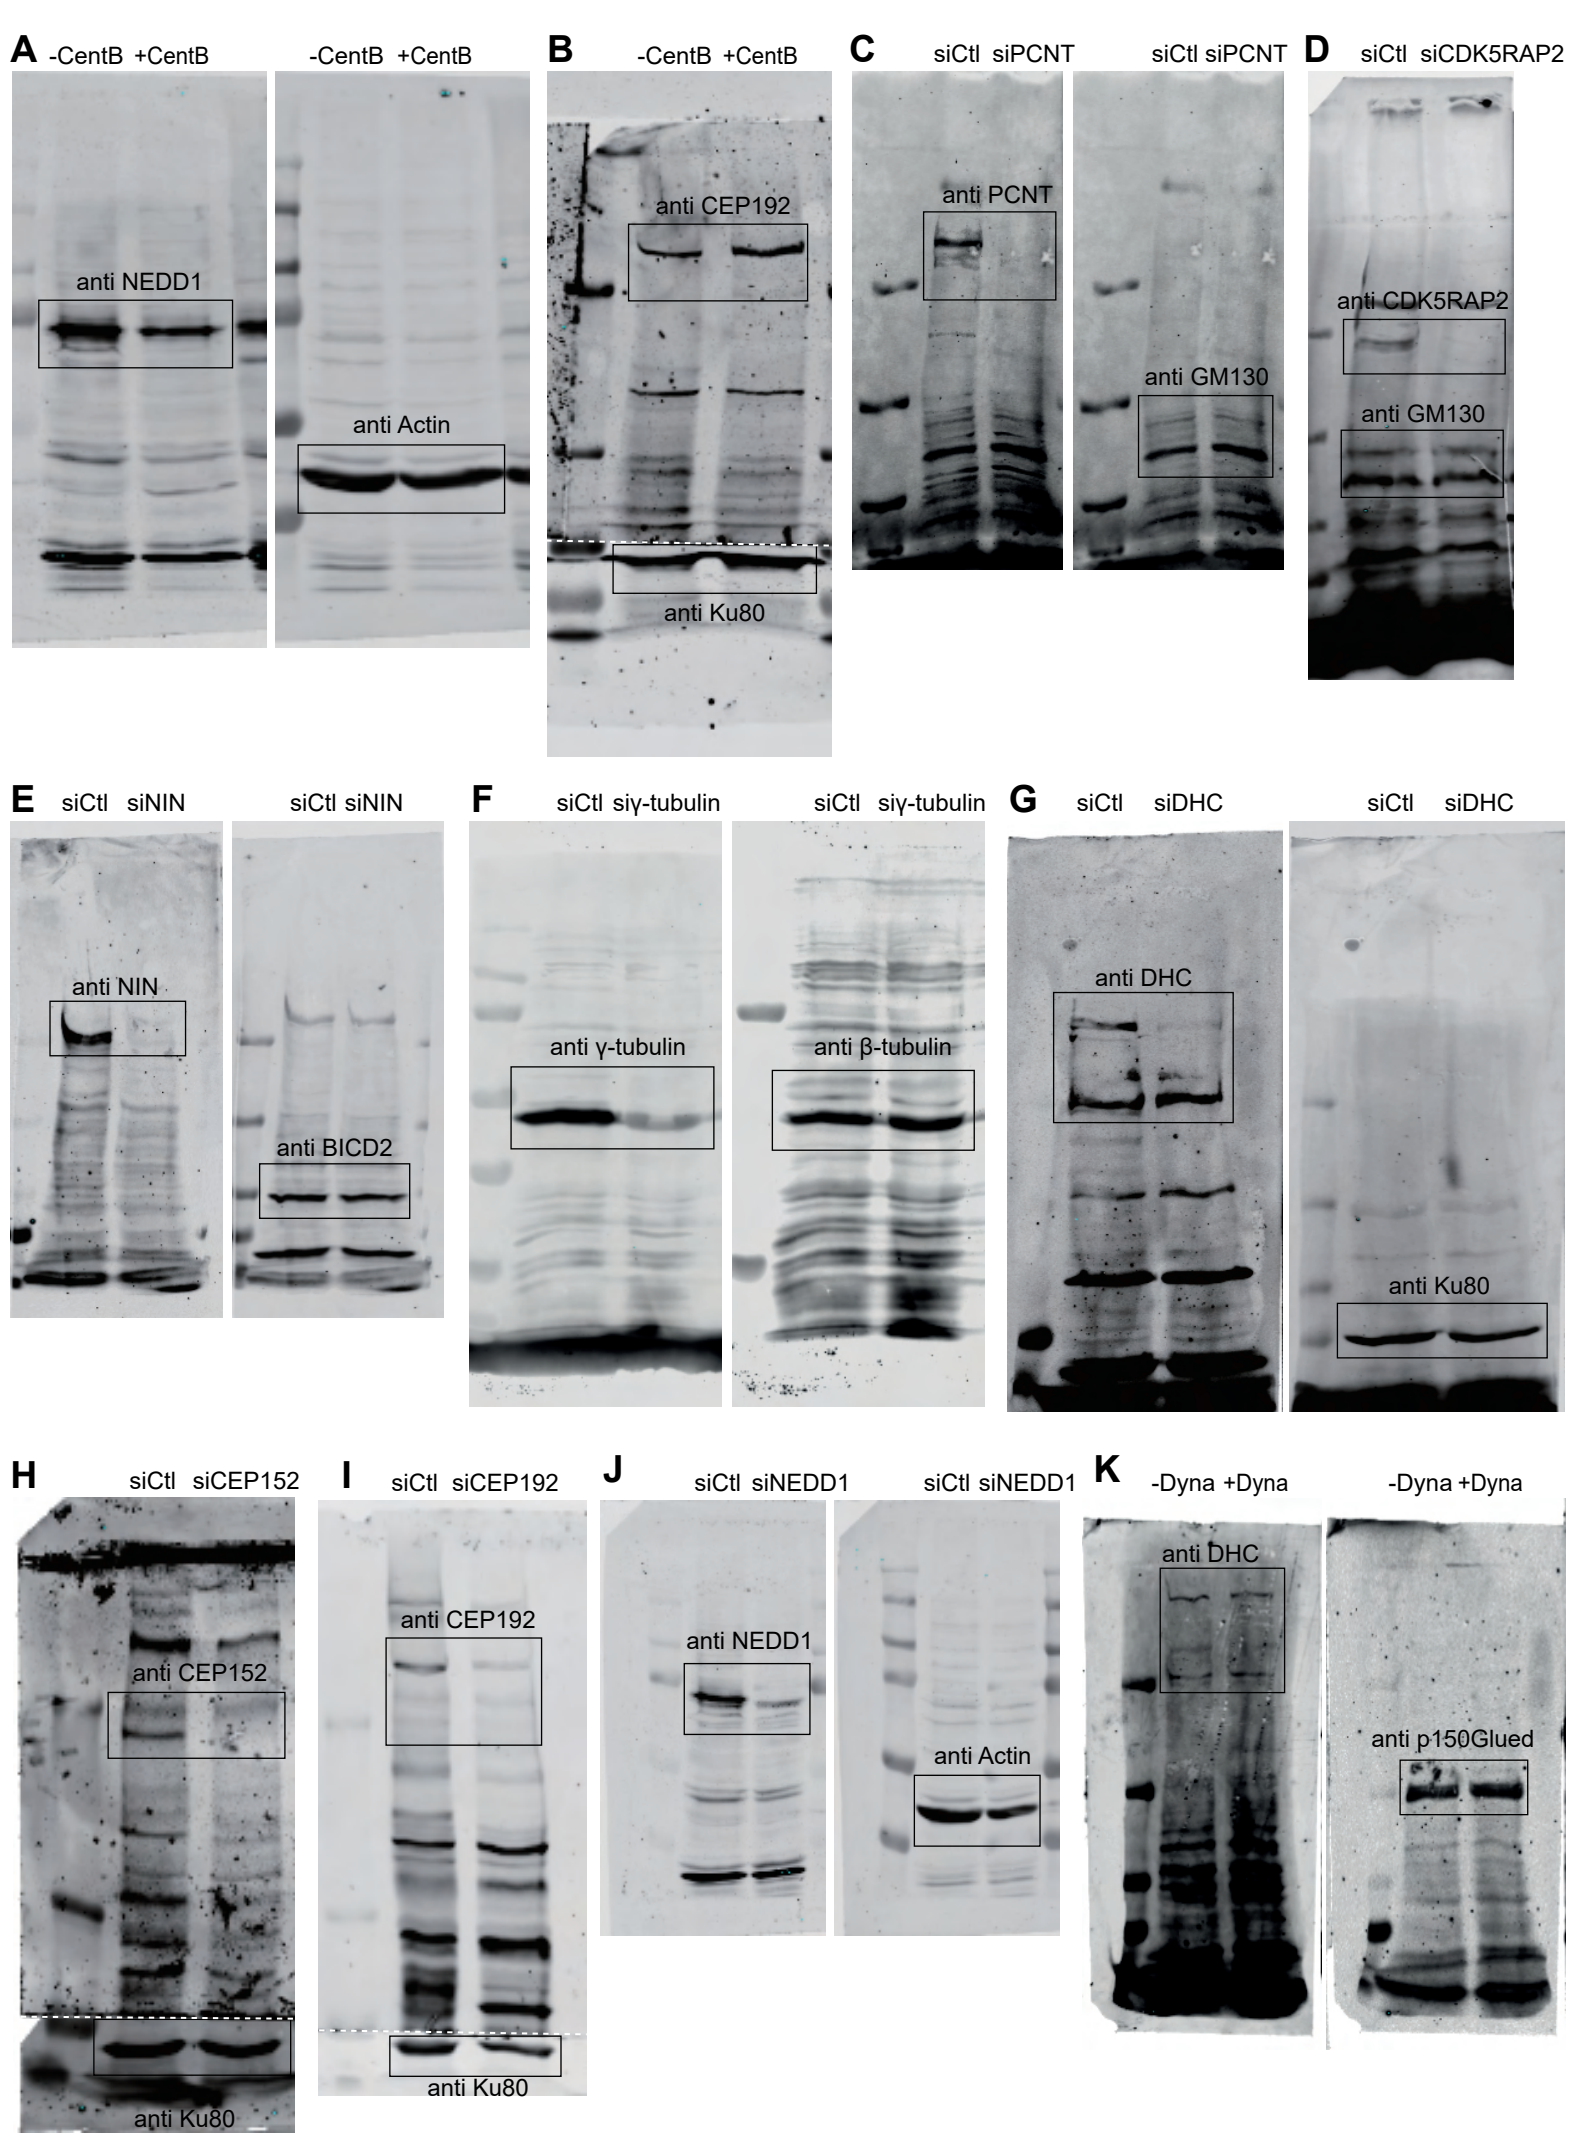

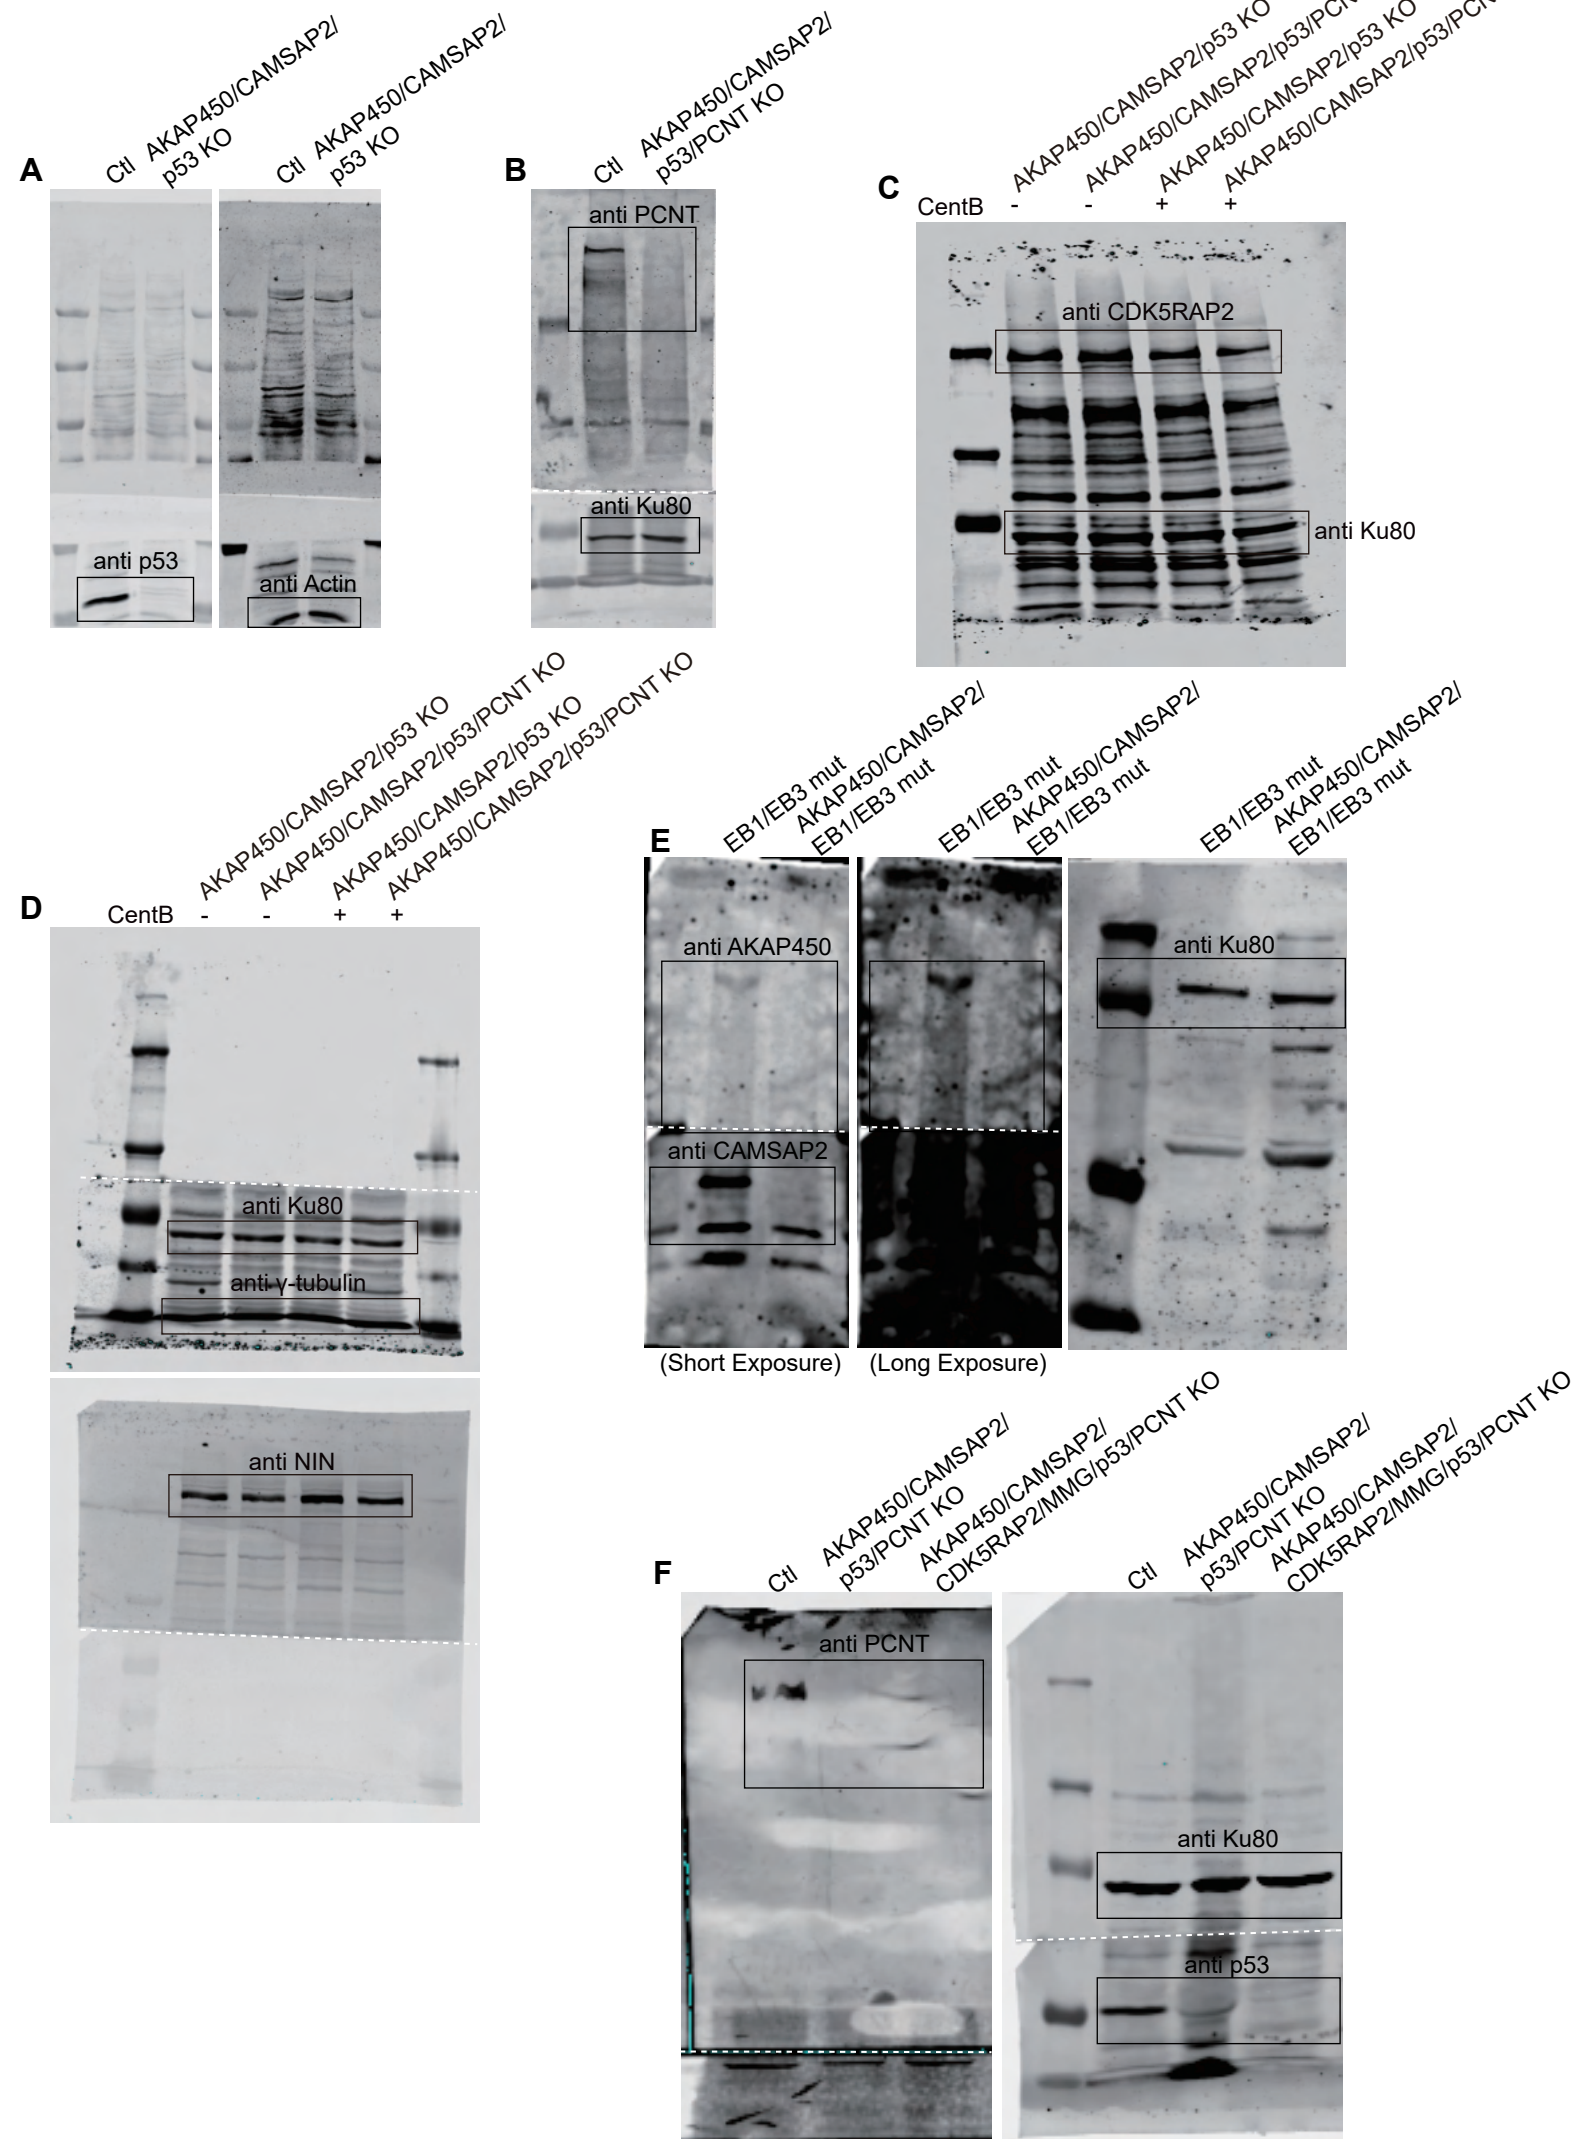

Source: https://www.biorxiv.org/content/biorxiv/early/2022/02/15/2021.08.22.457259.full.pdf
